# Supplementary material
Source: Copernicus journal article supplement (doi:10.5194/egusphere-2026-1771)
Supplement: Supplementary file 1 [file egusphere-2026-1771-supplement.pdf]

*Supplement of*

**Altitude-Dependent Role of Nitric Acid in Iodic Acid-Iodous  
Acid Nucleation: From Marine Boundary Layer Catalyst to  
Upper Troposphere Core Component**

**Jiaze Zhang et al.**

Corresponding to: Ling Liu (lingliu@bit.edu.cn), and Xiuhui Zhang  
(zhangxiuhui@bit.edu.cn)

The copyright of individual parts of the supplement might differ from the article licence.

*Totally, 52 pages, 8 figures and 5 tables*

## Contents

|                                                                     |     |
|---------------------------------------------------------------------|-----|
| Supplementary Methods .....                                         | S3  |
| Multi-step cluster conformational search method.....                | S3  |
| The equations in Atmospheric Cluster Dynamics Code (ACDC). .....    | S4  |
| Uncertainty analysis: impact of iodine oxoacid concentrations. .... | S5  |
| Figure S1 .....                                                     | S7  |
| Figure S2 .....                                                     | S8  |
| Figure S3 .....                                                     | S9  |
| Figure S4.....                                                      | S10 |
| Figure S5.....                                                      | S11 |
| Figure S6.....                                                      | S12 |
| Figure S7.....                                                      | S13 |
| Figure S8.....                                                      | S14 |
| Table S1 .....                                                      | S15 |
| Table S2 .....                                                      | S17 |
| Table S3 .....                                                      | S25 |
| Table S4 .....                                                      | S26 |
| Table S5 .....                                                      | S27 |
| Supplementary Reference .....                                       | S52 |

## Supplementary Methods

### Multi-step cluster conformational search method.

This study employed a multi-step computational workflow to optimize configurations and calculate energies for  $(\text{HNO}_3)_x(\text{HIO}_3)_y(\text{HIO}_2)_z$  clusters ( $2 \leq x + y + z \leq 6$ ,  $1 \leq x \leq 3$ ). Initially, the ABCluster program (Zhang and Dolg, 2015) with the UFF force field (Rappe et al., 1992) was employed to systematically generate initial configurations, yielding 5,000 low-energy candidate structures for each cluster. These structures were then subjected to preliminary optimization with the PM7 (Stewart, 2013) semi-empirical method in MOPAC2016 program (Stewart, 2016) to filter for 100 low-energy configurations. All subsequent Density Functional Theory (DFT) optimizations were performed with the Gaussian 09 package, consistently using the  $\omega\text{B97X-D}$  functional and a FineGrid for integration. This DFT stage proceeded in two steps with different basis sets. First, the 100 most stable configurations were reoptimized using the 6-31+G\* (for H, O, and N) + Lanl2DZ (for I) basis sets (Elm and Kristensen, 2017). Following this, the 10 most stable isomers were selected for a final, high-precision reoptimization using the 6-311++G(3df,3pd) (for H, O, and N) + aug-cc-pVTZ-PP with ECP28MDF (for I) basis sets (Francl et al., 1982; Peterson et al., 2003) with a tight convergence criterion. Vibrational frequency calculations were performed at this final level to confirm the optimized structures were true energy minima.

### The equations in Atmospheric Cluster Dynamics Code (ACDC).

The collision coefficient,  $\beta_{i,j}$ , between clusters  $i$  and  $j$  is derived from kinetic gas theory:

$$\beta_{i,j} = \left( \frac{3}{4\pi} \right)^{\frac{1}{6}} \left( \frac{6k_B T}{m_i} + \frac{6k_B T}{m_j} \right)^{\frac{1}{2}} \left( V_i^{\frac{1}{3}} + V_j^{\frac{1}{3}} \right)^2, \quad (\text{S1})$$

where  $m_i$  is the mass of cluster  $i$ ,  $T$  is temperature and  $V_i$  is the van der Waals (vdW) volume of cluster  $i$ . The volume of each molecular cluster,  $V_i$ , was calculated using the Marching Tetrahedra (MT) approach in Multiwfn 3.7 (Lu and Chen, 2012). Subsequently, the cluster diameter  $d_i$  was derived from  $V_i$  assuming a spherical geometry.

The evaporation rate coefficient is derived via the detailed balance assumption:

$$\gamma_{(i+j) \rightarrow i} = \beta_{i,j} c_{ref} \exp \left( \frac{\Delta G_{i+j} - \Delta G_i - \Delta G_j}{k_B T} \right), \quad (\text{S2})$$

where  $\Delta G_{i+j}$  is the Gibbs free energy of formation for cluster  $i + j$  at reference pressure  $P_{ref} = 1 \text{ atm}$ .

### **Uncertainty analysis: impact of iodine oxoacid concentrations.**

To probe the uncertainty from  $\text{HIO}_2$  concentration (Figure S7), we simulated scenarios where its concentration was reduced by one or two orders of magnitude from 2 to 14 km, relative to a base case where the concentration remained unchanged from 2 to 14 km, with all other species and environmental conditions held constant. The results reveal that the two nucleation mechanisms exhibit different sensitivities to  $\text{HIO}_2$ . The pure  $\text{HIO}_3$ - $\text{HIO}_2$  mechanism is most sensitive to  $\text{HIO}_2$  changes in the mid-troposphere (4-8 km), but above 9 km, a decrease in  $\text{HIO}_2$  concentration has little impact on its rate; this aligns with our cluster analysis (Figure 5(c)), which shows this mechanism relies primarily on  $\text{HIO}_3$  for growth at high altitudes. In contrast, the  $\text{HNO}_3$ - $\text{HIO}_3$ - $\text{HIO}_2$  mechanism shows a strong dependence on  $\text{HIO}_2$  in high-altitude regions, where a one or two order of magnitude reduction in  $\text{HIO}_2$  causes the maximum nucleation rate to drop by 10-fold and 50-fold, respectively, even as  $\text{HNO}_3$  still provides a promotional effect.

For  $\text{HIO}_3$ , we tested the effect in Scenario C (Figure S8) by reducing its concentration by one order of magnitude. Consistent with the previous findings, the pure  $\text{HIO}_3$ - $\text{HIO}_2$  mechanism is highly sensitive to the  $\text{HIO}_3$  concentration, whereas the  $\text{HNO}_3$ - $\text{HIO}_3$ - $\text{HIO}_2$  mechanism is less affected.

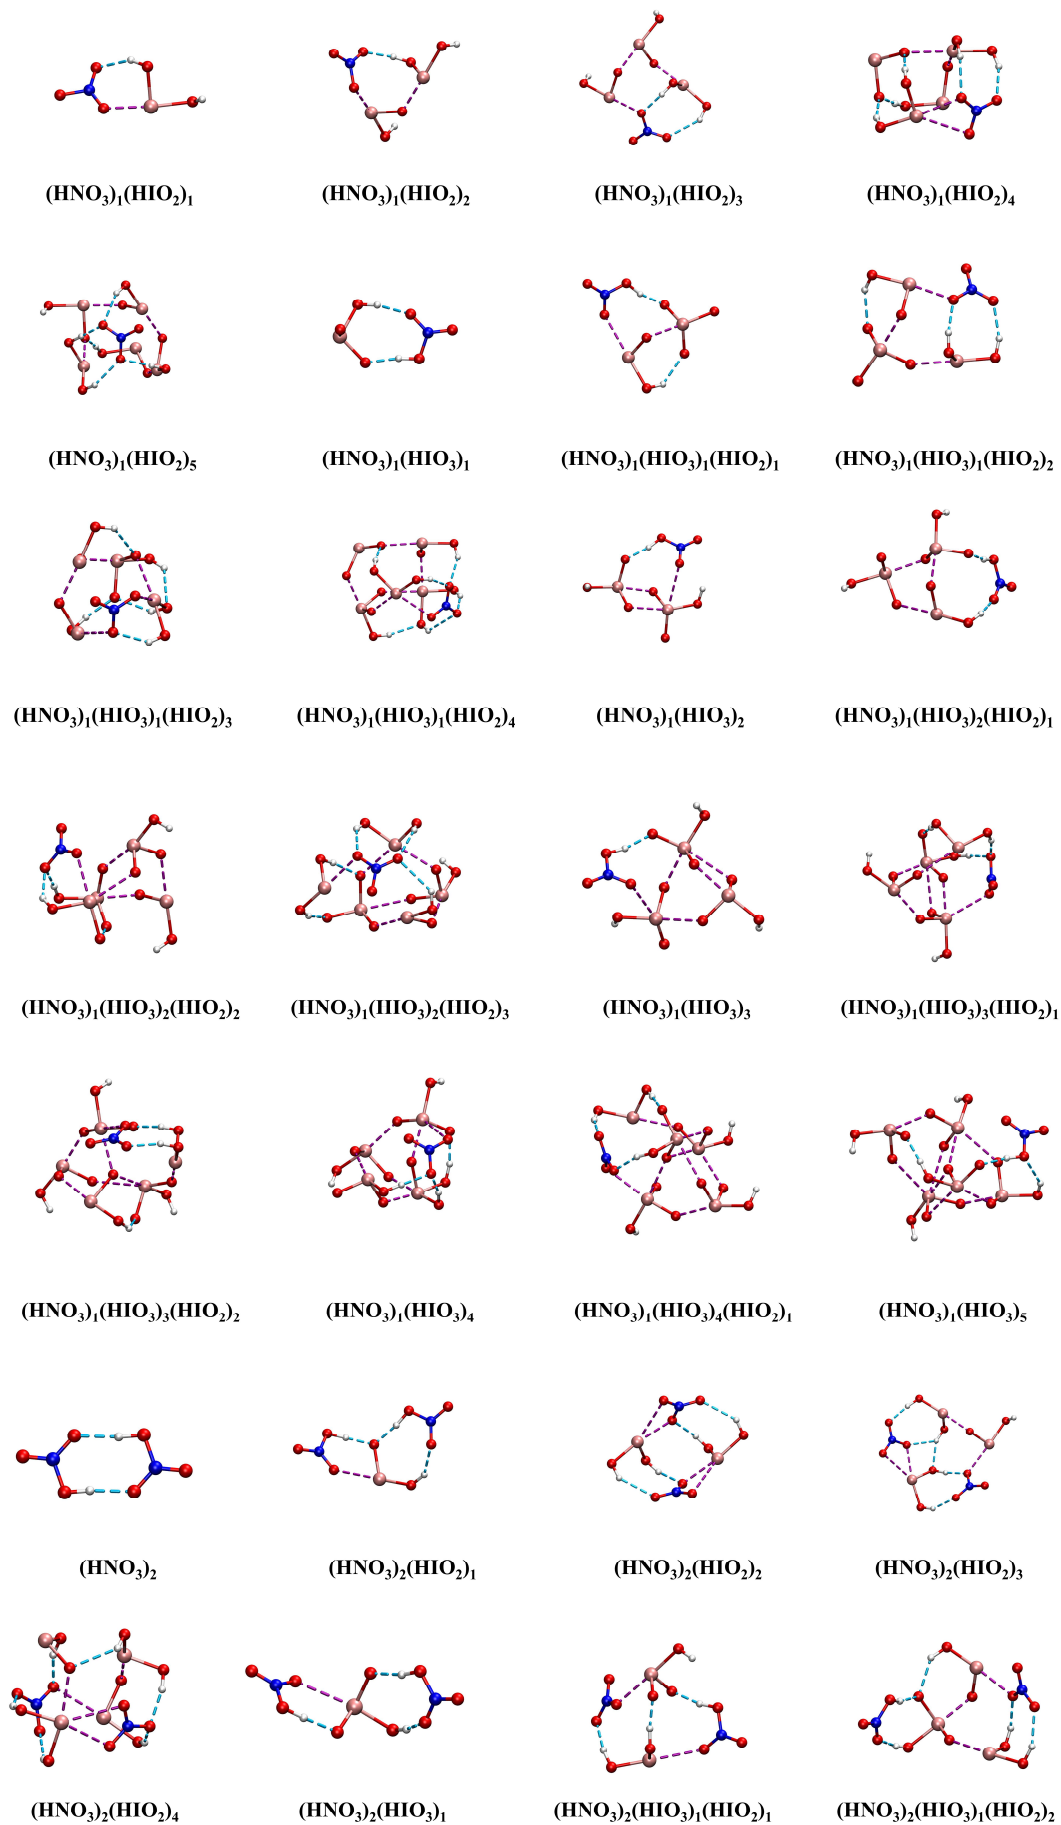

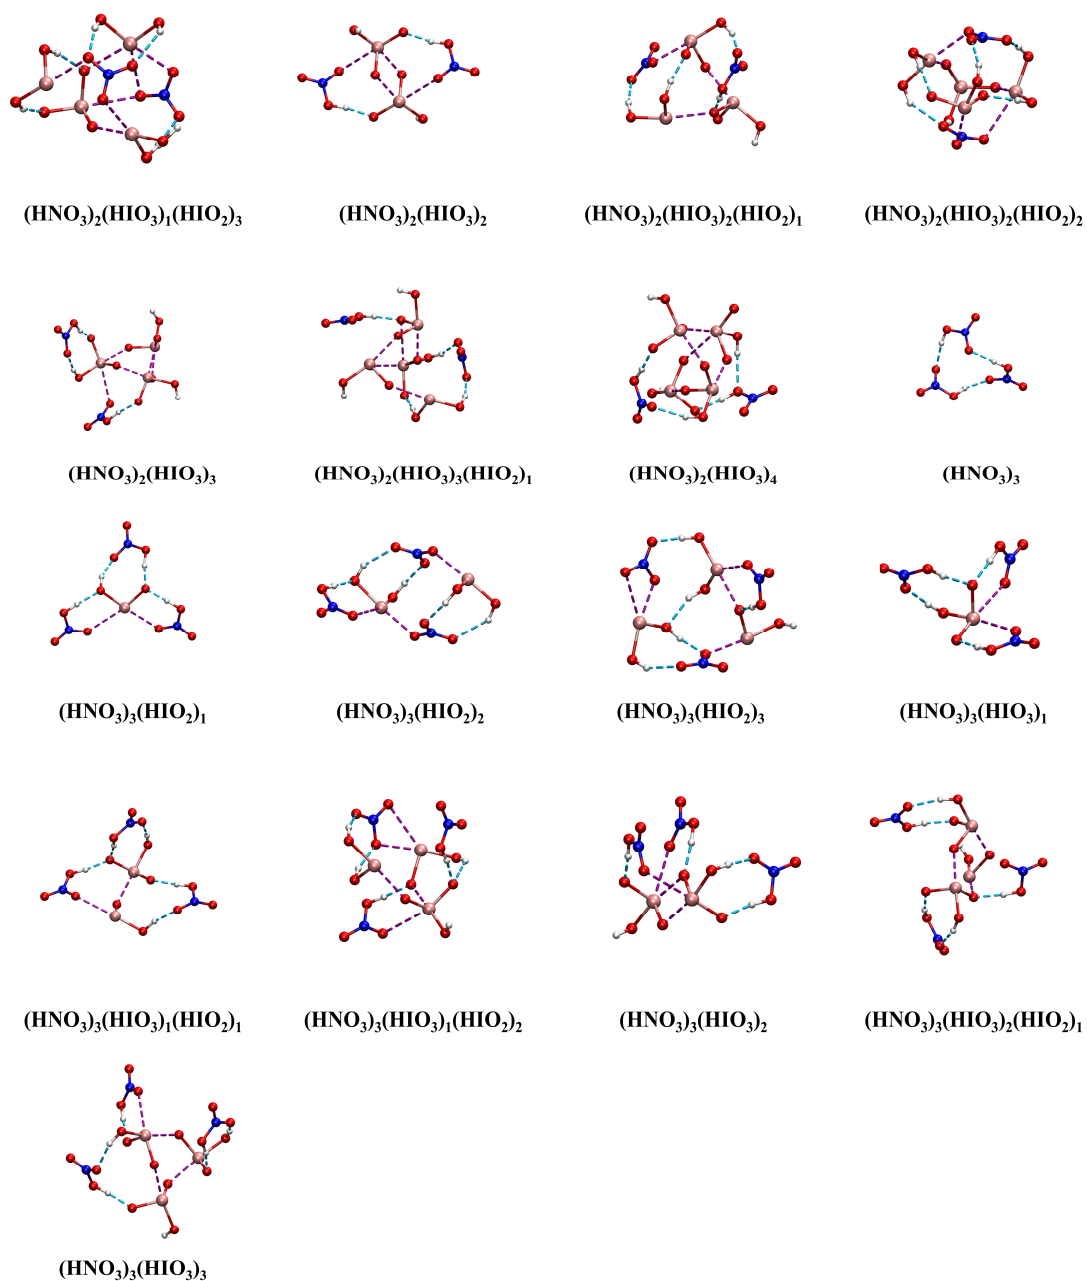

Figure S1. The most stable configurations of  $(\text{HNO}_3)_x(\text{HIO}_3)_y(\text{HIO}_2)_z$  clusters ( $2 \leq x + y + z \leq 6$ ,  $1 \leq x \leq 3$ ) identified at the  $\omega\text{B97X-D/6-311++G(3df, 3pd)}$  (for H, N, and O) and aug-cc-pVTZ-PP with ECP28MDF (for I) level of theory. The white, blue, red, and pink balls represent the H, N, O, and I atoms, respectively. Blue and purple dashed lines represent hydrogen bonds and halogen bonds, respectively.

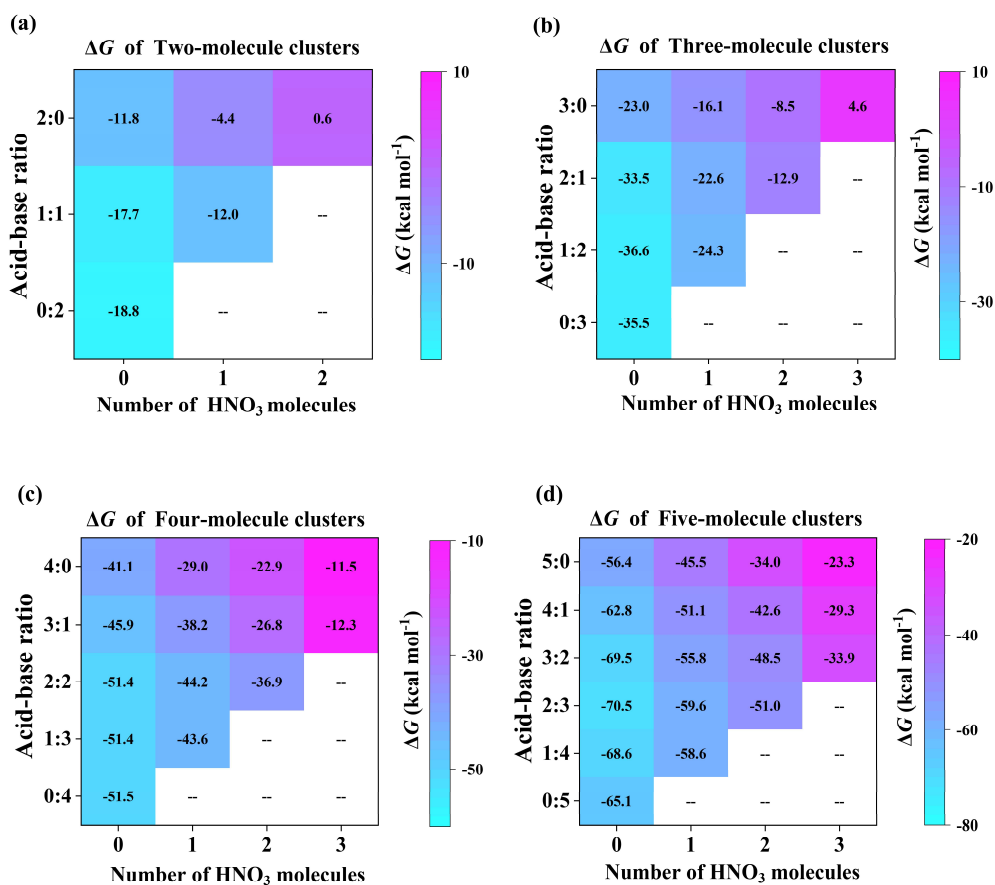

Figure S2. Gibbs free energies of formation ( $\Delta G$ , in  $\text{kcal mol}^{-1}$ ) at 288 K for the most stable  $\text{HNO}_3$ - $\text{HIO}_3$ - $\text{HIO}_2$  clusters with varying sizes: (a) two-, (b) three-, (c) four-, and (d) five-molecule clusters. All values were calculated at the DLPNO-CCSD(T)/aug-cc-pVTZ(-PP)// $\omega$ B97X-D/6-311++G(3df,3pd) + aug-cc-pVTZ-PP level of theory.

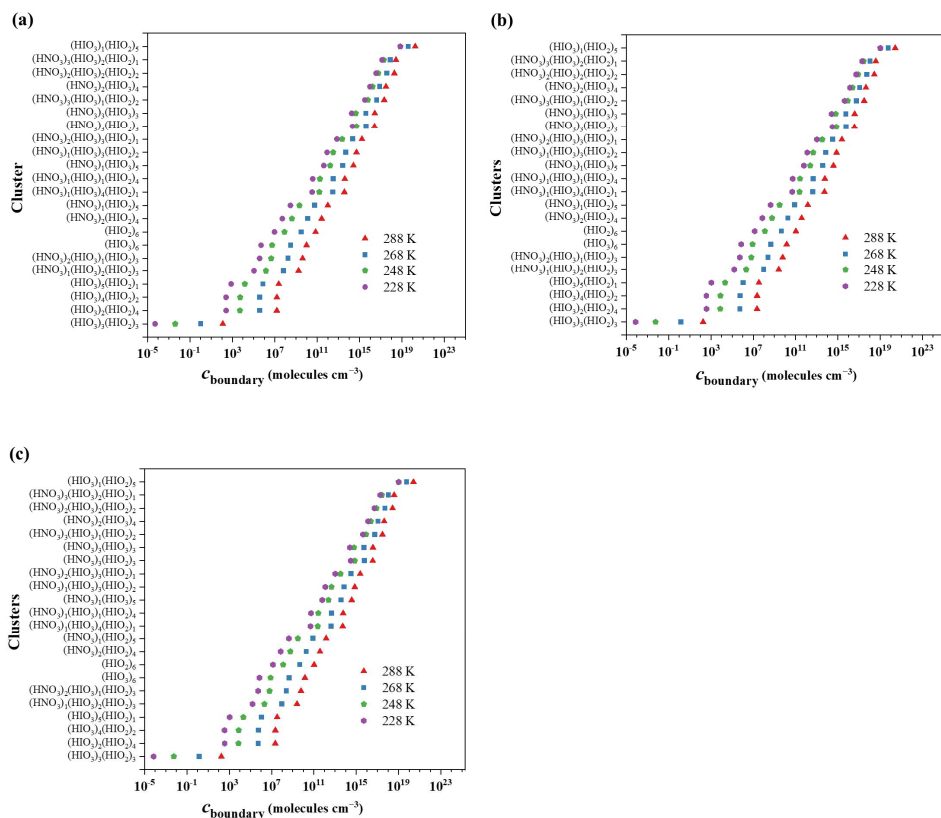

Figure S3. The minimum concentration,  $c_{\text{boundary}}$ , required for a six-molecule cluster to form a boundary cluster upon collision with (a)  $\text{HNO}_3$ , (b)  $\text{HIO}_3$ , and (c)  $\text{HIO}_2$  at different temperatures. Clusters are sorted in ascending order of  $c_{\text{boundary}}$ . This concentration is determined by the condition  $\beta c_{\text{boundary}}/\Sigma\gamma = 1$ .

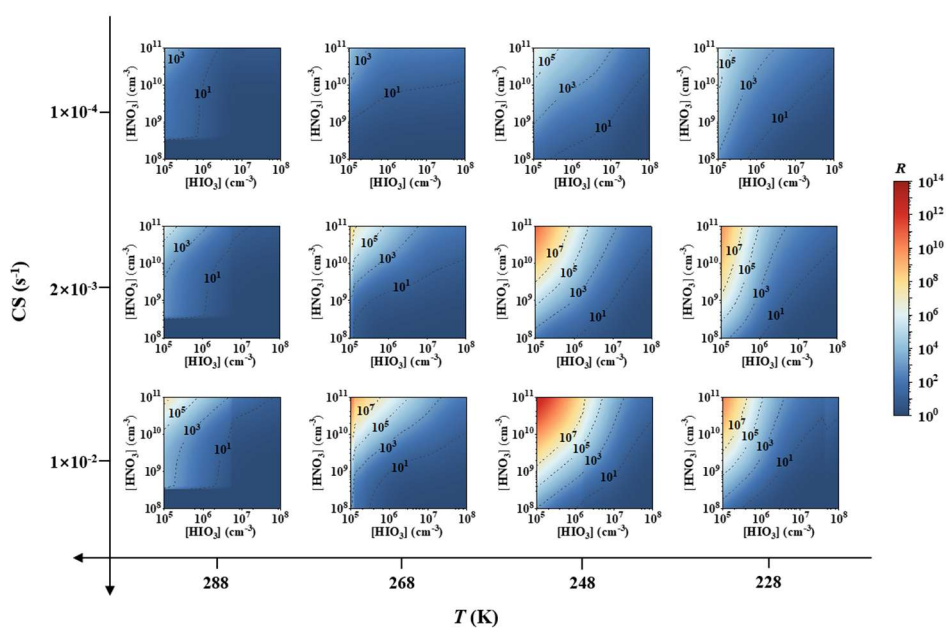

Figure S4. Heatmaps of HNO<sub>3</sub> enhancement factor ( $R$ ) as a function of HNO<sub>3</sub> and HIO<sub>3</sub> concentrations, simulated under various temperature ( $T$ ) and condensation sink (CS) conditions. The HIO<sub>2</sub> concentration was set to  $[\text{HIO}_2] = [\text{HIO}_3]/50$ .  $R$  is represented by a color gradient from blue ( $10^0$ ) to red ( $10^{14}$ ), with contour lines indicating  $R$  values of  $10^1$ ,  $10^3$ ,  $10^5$  and  $10^7$ .

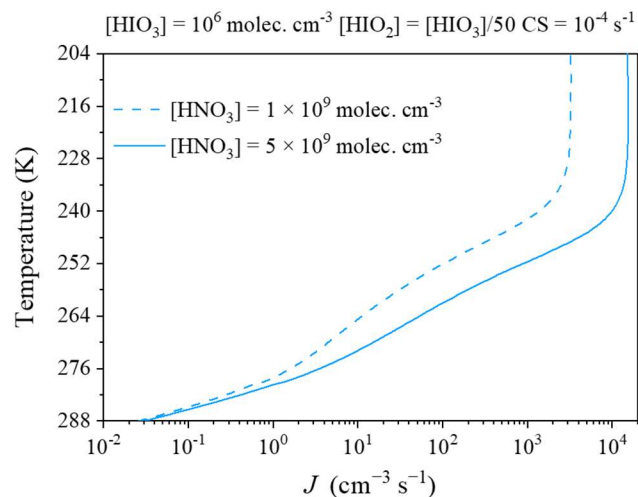

Figure S5. Temperature dependence of cluster formation rates  $J$  ( $\text{cm}^{-3} \text{ s}^{-1}$ ) for the  $\text{HNO}_3$ - $\text{HIO}_3$ - $\text{HIO}_2$  nucleation mechanism over the tropospheric temperature range (204–288 K). Simulation conditions were fixed at  $[\text{HIO}_3] = 10^6$  molecules  $\text{cm}^{-3}$ ,  $[\text{HIO}_2] = [\text{HIO}_3]/50$ , and  $\text{CS} = 10^{-4} \text{ s}^{-1}$ . The dashed and solid lines represent  $[\text{HNO}_3] = 1 \times 10^9$  molecules  $\text{cm}^{-3}$  and  $5 \times 10^9$  molecules  $\text{cm}^{-3}$ , respectively.

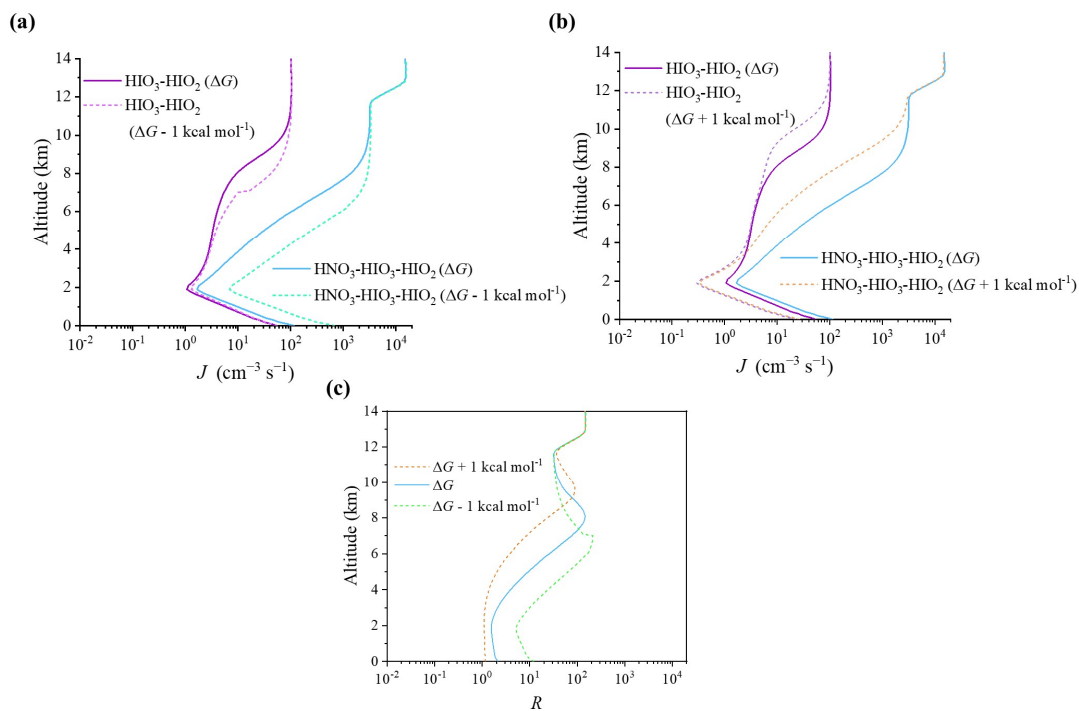

Figure S6. Sensitivity of cluster formation rates  $J$  ( $\text{cm}^{-3}\text{s}^{-1}$ ) and enhancement factor of HNO<sub>3</sub> ( $R$ ) to uncertainties in binding free energy ( $\Delta G$ ) at different altitudes. The simulations compare the Base scenario ( $\Delta G$ ) (solid lines) with two tests where the  $\Delta G$  of all clusters (excluding monomers) was systematically shifted by  $\pm 1 \text{ kcal mol}^{-1}$ . (a)  $J$  for the  $\Delta G - 1 \text{ kcal mol}^{-1}$  scenario compared to the Base scenario for the HIO<sub>3</sub>-HIO<sub>2</sub> and HNO<sub>3</sub>-HIO<sub>3</sub>-HIO<sub>2</sub> mechanisms. (b)  $J$  for the  $\Delta G + 1 \text{ kcal mol}^{-1}$  scenario compared to the Base scenario for both mechanisms. (c) Corresponding enhancement factor ( $R$ ) of HNO<sub>3</sub> for all three scenarios (Base  $\Delta G$ ,  $\Delta G - 1 \text{ kcal mol}^{-1}$ , and  $\Delta G + 1 \text{ kcal mol}^{-1}$ ).

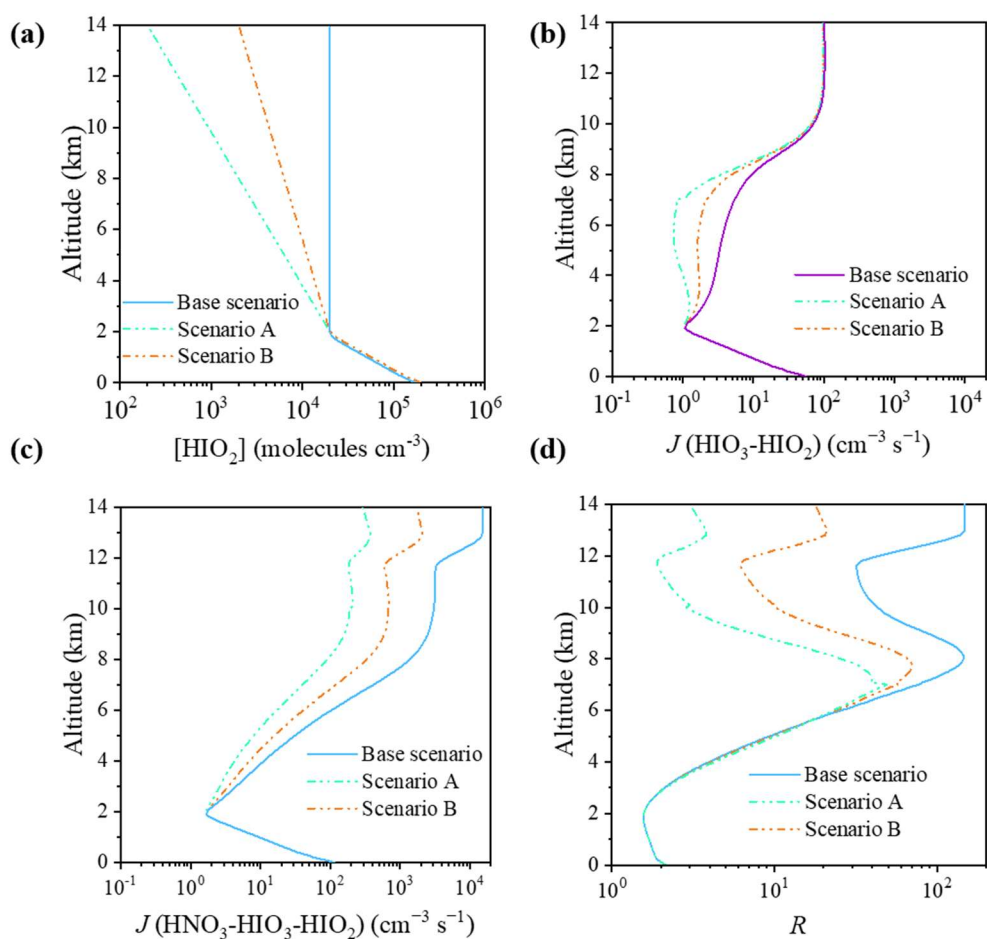

Figure S7. Sensitivity of cluster formation rates  $J$  ( $\text{cm}^{-3}\text{s}^{-1}$ ) and enhancement factor of  $\text{HNO}_3$  ( $R$ ) to the vertical profile of  $\text{HIO}_2$  concentration. The simulations are run for three different scenarios based on the  $[\text{HIO}_2]$  profile: the Base scenario (solid lines), Scenario A (brown dash-dotted lines, with  $[\text{HIO}_2]$  reduced by one order of magnitude from 2–14 km relative to the base), and Scenario B (cyan dash-dotted lines, with  $[\text{HIO}_2]$  reduced by two orders of magnitude from 2–14 km). (a) The assumed vertical concentration profiles for  $[\text{HIO}_2]$  in the three scenarios. (b, c)  $J$  at different altitudes for the (b)  $\text{HIO}_3$ - $\text{HIO}_2$  and (c)  $\text{HNO}_3$ - $\text{HIO}_3$ - $\text{HIO}_2$  mechanisms. (d) Corresponding enhancement factor of  $\text{HNO}_3$  ( $R$ ), calculated as the ratio of  $J(\text{HNO}_3\text{-HIO}_3\text{-HIO}_2)$  to  $J(\text{HIO}_3\text{-HIO}_2)$ .

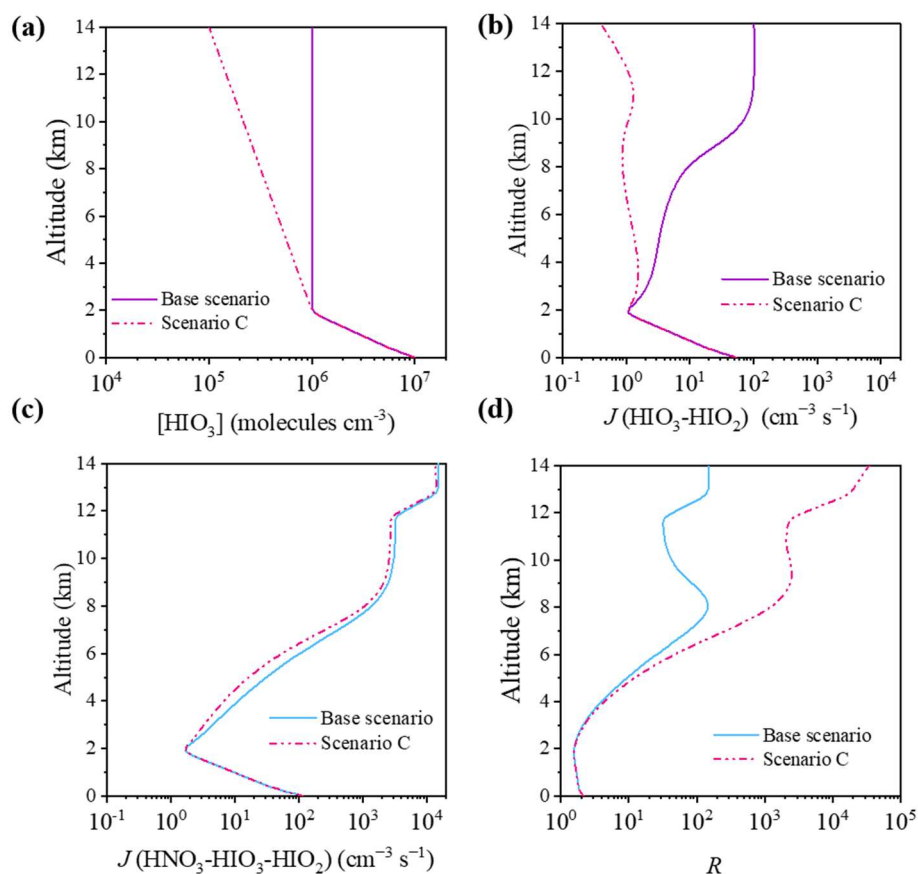

Figure S8. Sensitivity of cluster formation rates  $J$  ( $\text{cm}^{-3}\text{s}^{-1}$ ) and enhancement factor of  $\text{HNO}_3$  ( $R$ ) to the vertical profile of  $\text{HIO}_3$  concentration. The simulations are run for two different  $[\text{HIO}_3]$  profile scenarios: the Base scenario (solid lines) and Scenario C (pink dash-dotted lines, with  $[\text{HIO}_3]$  reduced by one order of magnitude from 2–14 km relative to the base). (a) The assumed vertical concentration profiles for  $[\text{HIO}_3]$  in the two scenarios. (b, c)  $J$  at different altitudes for the (b)  $\text{HIO}_3\text{-HIO}_2$  and (c)  $\text{HNO}_3\text{-HIO}_3\text{-HIO}_2$  mechanisms. (d) Corresponding enhancement factor of  $\text{HNO}_3$  ( $R$ ), calculated as the ratio of  $J(\text{HNO}_3\text{-HIO}_3\text{-HIO}_2)$  to  $J(\text{HIO}_3\text{-HIO}_2)$ .

Table S1. The Gibbs free energies of formation ( $\Delta G$ , kcal mol<sup>-1</sup>) of the (HNO<sub>3</sub>)<sub>x</sub>(HIO<sub>3</sub>)<sub>y</sub>(HIO<sub>2</sub>)<sub>z</sub> clusters ( $2 \leq x + y + z \leq 6$ ,  $1 \leq x \leq 3$ ) at DLPNO-CCSD(T)/aug-cc-pVTZ (for H, N, and O atoms) + aug-cc-pVTZ-PP with ECP28MDF (for I atom) level of theory at 288 K, 268 K, 248 K and 228 K.

| Clusters                                                                                           | $\Delta G$ (kcal mol <sup>-1</sup> ) |       |       |       |
|----------------------------------------------------------------------------------------------------|--------------------------------------|-------|-------|-------|
|                                                                                                    | 288K                                 | 268K  | 248K  | 228K  |
| (HNO <sub>3</sub> ) <sub>1</sub> (HIO <sub>2</sub> ) <sub>1</sub>                                  | -12.0                                | -12.8 | -13.6 | -14.4 |
| (HNO <sub>3</sub> ) <sub>1</sub> (HIO <sub>2</sub> ) <sub>2</sub>                                  | -24.3                                | -25.9 | -27.5 | -29.1 |
| (HNO <sub>3</sub> ) <sub>1</sub> (HIO <sub>2</sub> ) <sub>3</sub>                                  | -43.6                                | -46.1 | -48.6 | -51.1 |
| (HNO <sub>3</sub> ) <sub>1</sub> (HIO <sub>2</sub> ) <sub>4</sub>                                  | -58.6                                | -62.0 | -65.4 | -68.8 |
| (HNO <sub>3</sub> ) <sub>1</sub> (HIO <sub>2</sub> ) <sub>5</sub>                                  | -74.8                                | -79.1 | -83.3 | -87.6 |
| (HNO <sub>3</sub> ) <sub>1</sub> (HIO <sub>3</sub> ) <sub>1</sub>                                  | -4.4                                 | -5.1  | -5.8  | -6.4  |
| (HNO <sub>3</sub> ) <sub>1</sub> (HIO <sub>3</sub> ) <sub>1</sub> (HIO <sub>2</sub> ) <sub>1</sub> | -22.6                                | -24.2 | -25.8 | -27.4 |
| (HNO <sub>3</sub> ) <sub>1</sub> (HIO <sub>3</sub> ) <sub>1</sub> (HIO <sub>2</sub> ) <sub>2</sub> | -44.2                                | -46.7 | -49.2 | -51.7 |
| (HNO <sub>3</sub> ) <sub>1</sub> (HIO <sub>3</sub> ) <sub>1</sub> (HIO <sub>2</sub> ) <sub>3</sub> | -59.6                                | -63.0 | -66.3 | -69.7 |
| (HNO <sub>3</sub> ) <sub>1</sub> (HIO <sub>3</sub> ) <sub>1</sub> (HIO <sub>2</sub> ) <sub>4</sub> | -76.2                                | -80.5 | -84.9 | -89.2 |
| (HNO <sub>3</sub> ) <sub>1</sub> (HIO <sub>3</sub> ) <sub>2</sub>                                  | -16.1                                | -17.7 | -19.2 | -20.8 |
| (HNO <sub>3</sub> ) <sub>1</sub> (HIO <sub>3</sub> ) <sub>2</sub> (HIO <sub>2</sub> ) <sub>1</sub> | -38.2                                | -40.6 | -42.9 | -45.3 |
| (HNO <sub>3</sub> ) <sub>1</sub> (HIO <sub>3</sub> ) <sub>2</sub> (HIO <sub>2</sub> ) <sub>2</sub> | -55.8                                | -59.1 | -62.5 | -65.9 |
| (HNO <sub>3</sub> ) <sub>1</sub> (HIO <sub>3</sub> ) <sub>2</sub> (HIO <sub>2</sub> ) <sub>3</sub> | -83.9                                | -88.1 | -92.3 | -96.6 |
| (HNO <sub>3</sub> ) <sub>1</sub> (HIO <sub>3</sub> ) <sub>3</sub>                                  | -29.0                                | -31.4 | -33.7 | -36.1 |
| (HNO <sub>3</sub> ) <sub>1</sub> (HIO <sub>3</sub> ) <sub>3</sub> (HIO <sub>2</sub> ) <sub>1</sub> | -51.1                                | -54.5 | -57.9 | -61.3 |
| (HNO <sub>3</sub> ) <sub>1</sub> (HIO <sub>3</sub> ) <sub>3</sub> (HIO <sub>2</sub> ) <sub>2</sub> | -75.7                                | -79.9 | -84.2 | -88.5 |
| (HNO <sub>3</sub> ) <sub>1</sub> (HIO <sub>3</sub> ) <sub>4</sub>                                  | -45.6                                | -49.0 | -52.4 | -55.8 |
| (HNO <sub>3</sub> ) <sub>1</sub> (HIO <sub>3</sub> ) <sub>4</sub> (HIO <sub>2</sub> ) <sub>1</sub> | -70.5                                | -74.6 | -78.8 | -83.0 |
| (HNO <sub>3</sub> ) <sub>1</sub> (HIO <sub>3</sub> ) <sub>5</sub>                                  | -63.0                                | -67.1 | -71.2 | -75.4 |
| (HNO <sub>3</sub> ) <sub>2</sub>                                                                   | 0.6                                  | -0.1  | -0.8  | -1.5  |
| (HNO <sub>3</sub> ) <sub>2</sub> (HIO <sub>2</sub> ) <sub>1</sub>                                  | -12.9                                | -14.4 | -15.9 | -17.4 |
| (HNO <sub>3</sub> ) <sub>2</sub> (HIO <sub>2</sub> ) <sub>2</sub>                                  | -36.9                                | -39.4 | -41.9 | -44.4 |
| (HNO <sub>3</sub> ) <sub>2</sub> (HIO <sub>2</sub> ) <sub>3</sub>                                  | -51.0                                | -54.2 | -57.5 | -60.7 |
| (HNO <sub>3</sub> ) <sub>2</sub> (HIO <sub>2</sub> ) <sub>4</sub>                                  | -69.1                                | -73.4 | -77.7 | -82.0 |
| (HNO <sub>3</sub> ) <sub>2</sub> (HIO <sub>3</sub> ) <sub>1</sub>                                  | -8.5                                 | -9.9  | -11.3 | -12.8 |
| (HNO <sub>3</sub> ) <sub>2</sub> (HIO <sub>3</sub> ) <sub>1</sub> (HIO <sub>2</sub> ) <sub>1</sub> | -26.8                                | -29.2 | -31.5 | -33.9 |

|                                                    |       |       |       |       |
|----------------------------------------------------|-------|-------|-------|-------|
| $(\text{HNO}_3)_2(\text{HIO}_3)_1(\text{HIO}_2)_2$ | -48.5 | -51.6 | -54.8 | -57.9 |
| $(\text{HNO}_3)_2(\text{HIO}_3)_1(\text{HIO}_2)_3$ | -72.5 | -76.6 | -80.9 | -85.1 |
| $(\text{HNO}_3)_2(\text{HIO}_3)_2$                 | -22.9 | -25.2 | -27.4 | -29.7 |
| $(\text{HNO}_3)_2(\text{HIO}_3)_2(\text{HIO}_2)_1$ | -42.6 | -45.9 | -49.2 | -52.5 |
| $(\text{HNO}_3)_2(\text{HIO}_3)_2(\text{HIO}_2)_2$ | -57.2 | -61.4 | -65.5 | -69.7 |
| $(\text{HNO}_3)_2(\text{HIO}_3)_3$                 | -34.0 | -37.0 | -40.1 | -43.2 |
| $(\text{HNO}_3)_2(\text{HIO}_3)_3(\text{HIO}_2)_1$ | -56.6 | -60.7 | -64.8 | -69.0 |
| $(\text{HNO}_3)_2(\text{HIO}_3)_4$                 | -48.0 | -52.0 | -56.0 | -60.1 |
| $(\text{HNO}_3)_3$                                 | 4.6   | 3.3   | 1.9   | 0.5   |
| $(\text{HNO}_3)_3(\text{HIO}_2)_1$                 | -12.3 | -14.5 | -16.8 | -19.0 |
| $(\text{HNO}_3)_3(\text{HIO}_2)_2$                 | -33.9 | -37.0 | -40.1 | -43.3 |
| $(\text{HNO}_3)_3(\text{HIO}_2)_3$                 | -54.9 | -58.9 | -62.9 | -66.9 |
| $(\text{HNO}_3)_3(\text{HIO}_3)_1$                 | -11.5 | -13.6 | -15.7 | -17.8 |
| $(\text{HNO}_3)_3(\text{HIO}_3)_1(\text{HIO}_2)_1$ | -29.3 | -32.3 | -35.2 | -38.2 |
| $(\text{HNO}_3)_3(\text{HIO}_3)_1(\text{HIO}_2)_2$ | -51.2 | -55.0 | -58.9 | -62.8 |
| $(\text{HNO}_3)_3(\text{HIO}_3)_2$                 | -23.3 | -26.3 | -29.2 | -32.2 |
| $(\text{HNO}_3)_3(\text{HIO}_3)_2(\text{HIO}_2)_1$ | -43.9 | -47.7 | -51.6 | -55.5 |
| $(\text{HNO}_3)_3(\text{HIO}_3)_3$                 | -37.9 | -41.7 | -45.5 | -49.4 |

---

Table S2. The bond types, corresponding weakly interacting species (with proton transfer indicated by the ionic forms of the molecules), bond lengths (Å), electron density  $\rho(r)$  (a.u.), Laplacian electron density  $\nabla^2\rho(r)$  (a.u.), and energy density  $H(r)$  (a.u.) at the bond critical points (BCPs) of the respective weak interactions. The orange spheres denote the bond critical points (BCPs) in the Atoms in Molecules (AIM) theory analysis. HB (hydrogen bond), XB (halogen bond).

| Cluster                                                                                                                                                  | Bond                                                                             | Bond type | Bond lengths (Å) | $\rho(r)$ (a.u.) | $\nabla^2\rho(r)$ (a.u.) | $H(r)$ (a.u.) |
|----------------------------------------------------------------------------------------------------------------------------------------------------------|----------------------------------------------------------------------------------|-----------|------------------|------------------|--------------------------|---------------|
| 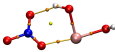<br>(HNO <sub>3</sub> ) <sub>1</sub> (HIO <sub>2</sub> ) <sub>1</sub>   | NO <sub>3</sub> <sup>-</sup> (O)⋯(I) H <sub>2</sub> IO <sub>2</sub> <sup>+</sup> | XB        | 2.22             | 0.0806           | 0.1772                   | 0.0221        |
|                                                                                                                                                          | NO <sub>3</sub> <sup>-</sup> (O)⋯(H) H <sub>2</sub> IO <sub>2</sub> <sup>+</sup> | HB        | 1.86             | 0.0391           | 0.1111                   | 0.0037        |
| <br>(HNO <sub>3</sub> ) <sub>1</sub> (HIO <sub>2</sub> ) <sub>2</sub>   | HIO <sub>2</sub> (O)⋯(I) H <sub>2</sub> IO <sub>2</sub> <sup>+</sup>             | XB        | 2.19             | 0.0841           | 0.1786                   | -0.0240       |
|                                                                                                                                                          | HIO <sub>2</sub> (I)⋯(O) NO <sub>3</sub> <sup>-</sup>                            | XB        | 2.32             | 0.0645           | 0.1490                   | -0.0124       |
|                                                                                                                                                          | H <sub>2</sub> IO <sub>2</sub> <sup>+</sup> (H)⋯(O) NO <sub>3</sub> <sup>-</sup> | HB        | 1.68             | 0.0460           | 0.1140                   | -0.0088       |
| <br>(HNO <sub>3</sub> ) <sub>1</sub> (HIO <sub>2</sub> ) <sub>3</sub> | H <sub>2</sub> IO <sub>2</sub> <sup>+</sup> (I)⋯(O) HIO <sub>2</sub>             | XB        | 2.24             | 0.0764           | 0.1650                   | -0.0190       |
|                                                                                                                                                          | HIO <sub>2</sub> (O)⋯(I) HIO <sub>2</sub>                                        | XB        | 2.24             | 0.0745           | 0.1639                   | -0.0178       |
|                                                                                                                                                          | NO <sub>3</sub> <sup>-</sup> (O)⋯(I) HIO <sub>2</sub>                            | XB        | 2.42             | 0.0527           | 0.1240                   | -0.0073       |
|                                                                                                                                                          | NO <sub>3</sub> <sup>-</sup> (O)⋯(H) H <sub>2</sub> IO <sub>2</sub> <sup>+</sup> | HB        | 1.74             | 0.0413           | 0.1117                   | -0.0056       |
|                                                                                                                                                          | NO <sub>3</sub> <sup>-</sup> (O)⋯(H) H <sub>2</sub> IO <sub>2</sub> <sup>+</sup> | HB        | 2.24             | 0.0123           | 0.0464                   | 0.0018        |
|                                                                                                                                                          | HIO <sub>2</sub> (H)⋯(O) IO <sub>2</sub> <sup>-</sup>                            | HB        | 1.54             | 0.0701           | 0.1053                   | -0.0252       |
| <br>(HNO <sub>3</sub> ) <sub>1</sub> (HIO <sub>2</sub> ) <sub>4</sub> | IO <sub>2</sub> <sup>-</sup> (O)⋯(H) H <sub>2</sub> IO <sub>2</sub> <sup>+</sup> | HB        | 1.65             | 0.0529           | 0.1092                   | -0.0133       |
|                                                                                                                                                          | NO <sub>3</sub> <sup>-</sup> (O)⋯(I) H <sub>2</sub> IO <sub>2</sub> <sup>+</sup> | XB        | 2.46             | 0.0502           | 0.1185                   | -0.0065       |
|                                                                                                                                                          | HIO <sub>2</sub> (O)⋯(I) H <sub>2</sub> IO <sub>2</sub> <sup>+</sup>             | XB        | 2.46             | 0.0490           | 0.1260                   | -0.0051       |
|                                                                                                                                                          | H <sub>2</sub> IO <sub>2</sub> <sup>+</sup> (I)⋯(O) IO <sub>2</sub> <sup>-</sup> | XB        | 2.53             | 0.0411           | 0.1121                   | -0.0023       |
|                                                                                                                                                          | IO <sub>2</sub> <sup>-</sup> (O)⋯(H) H <sub>2</sub> IO <sub>2</sub> <sup>+</sup> | HB        | 1.76             | 0.0404           | 0.1058                   | -0.0056       |
|                                                                                                                                                          | H <sub>2</sub> IO <sub>2</sub> <sup>+</sup> (H)⋯(O) NO <sub>3</sub> <sup>-</sup> | HB        | 1.95             | 0.0232           | 0.0854                   | 0.0017        |
|                                                                                                                                                          | NO <sub>3</sub> <sup>-</sup> (O)⋯(I) H <sub>2</sub> IO <sub>2</sub> <sup>+</sup> | XB        | 2.87             | 0.0220           | 0.0693                   | 0.0004        |
|                                                                                                                                                          | H <sub>2</sub> IO <sub>2</sub> <sup>+</sup> (H)⋯(O) NO <sub>3</sub> <sup>-</sup> | HB        | 2.06             | 0.0196           | 0.0704                   | 0.0018        |
|                                                                                                                                                          | HIO <sub>2</sub> (I)⋯(O) HIO <sub>2</sub>                                        | XB        | 2.22             | 0.0794           | 0.1711                   | -0.0211       |
|                                                                                                                                                          | HIO <sub>2</sub> (O)⋯(I) H <sub>2</sub> IO <sub>2</sub> <sup>+</sup>             | XB        | 2.29             | 0.0683           | 0.1531                   | -0.0142       |
| <br>(HNO <sub>3</sub> ) <sub>1</sub> (HIO <sub>2</sub> ) <sub>5</sub> | HIO <sub>2</sub> (I)⋯(O) HIO <sub>2</sub>                                        | XB        | 2.31             | 0.0654           | 0.1533                   | -0.0125       |
|                                                                                                                                                          | H <sub>2</sub> IO <sub>2</sub> <sup>+</sup> (H)⋯(O) NO <sub>3</sub> <sup>-</sup> | HB        | 1.61             | 0.0584           | 0.1086                   | -0.0170       |
|                                                                                                                                                          | HIO <sub>2</sub> (H)⋯(O) HIO <sub>2</sub>                                        | HB        | 1.64             | 0.0533           | 0.1077                   | -0.0141       |
|                                                                                                                                                          | HIO <sub>2</sub> (O)⋯(I) HIO <sub>2</sub>                                        | XB        | 2.40             | 0.0532           | 0.1332                   | -0.0067       |
|                                                                                                                                                          | NO <sub>3</sub> <sup>-</sup> (O)⋯(H) HIO <sub>2</sub>                            | HB        | 1.92             | 0.0271           | 0.0849                   | -0.0003       |
|                                                                                                                                                          | H <sub>2</sub> IO <sub>2</sub> <sup>+</sup> (H)⋯(O) NO <sub>3</sub> <sup>-</sup> | HB        | 2.09             | 0.0180           | 0.0684                   | 0.0021        |
|                                                                                                                                                          | HIO <sub>2</sub> (H)⋯(O) NO <sub>3</sub> <sup>-</sup>                            | HB        | 2.11             | 0.0179           | 0.0635                   | 0.0016        |
|                                                                                                                                                          | HIO <sub>3</sub> (O)⋯(H) HNO <sub>3</sub>                                        | HB        | 1.64             | 0.0512           | 0.1088                   | -0.0129       |

|                                                                                                     |                                                                                  |    |      |        |        |         |
|-----------------------------------------------------------------------------------------------------|----------------------------------------------------------------------------------|----|------|--------|--------|---------|
|                    | HNO <sub>3</sub> (O)⋯(H) HIO <sub>3</sub>                                        | HB | 1.82 | 0.0301 | 0.1013 | -0.0006 |
| (HNO <sub>3</sub> ) <sub>1</sub> (HIO <sub>3</sub> ) <sub>1</sub>                                   | HIO <sub>2</sub> (O)⋯(I) HIO <sub>3</sub>                                        | XB | 2.26 | 0.0756 | 0.1457 | -0.0195 |
|                    | HIO <sub>3</sub> (O)⋯(H) HNO <sub>3</sub>                                        | HB | 1.54 | 0.0668 | 0.1069 | -0.0231 |
| (HNO <sub>3</sub> ) <sub>1</sub> (HIO <sub>3</sub> ) <sub>1</sub> (HIO <sub>2</sub> ) <sub>1</sub>  | HIO <sub>2</sub> (I)⋯(O) HNO <sub>3</sub>                                        | XB | 2.67 | 0.0271 | 0.0909 | 0.0011  |
|                    | HIO <sub>2</sub> (H)⋯(O) HIO <sub>3</sub>                                        | HB | 2.05 | 0.0207 | 0.0761 | 0.0019  |
| (HNO <sub>3</sub> ) <sub>1</sub> (HIO <sub>3</sub> ) <sub>1</sub> (HIO <sub>2</sub> ) <sub>2</sub>  | HIO <sub>3</sub> (I)⋯(O) HIO <sub>2</sub>                                        | XB | 2.19 | 0.0866 | 0.1653 | -0.0262 |
|                    | HIO <sub>3</sub> (O)⋯(I) H <sub>2</sub> IO <sub>2</sub> <sup>+</sup>             | XB | 2.33 | 0.0589 | 0.1576 | -0.0084 |
| (HNO <sub>3</sub> ) <sub>1</sub> (HIO <sub>3</sub> ) <sub>1</sub> (HIO <sub>2</sub> ) <sub>2</sub>  | NO <sub>3</sub> <sup>-</sup> (O)⋯(I) HIO <sub>2</sub>                            | XB | 2.42 | 0.0526 | 0.1265 | -0.0073 |
|                    | H <sub>2</sub> IO <sub>2</sub> <sup>+</sup> (H)⋯(O) NO <sub>3</sub> <sup>-</sup> | HB | 1.90 | 0.0272 | 0.0914 | 0.0004  |
| (HNO <sub>3</sub> ) <sub>1</sub> (HIO <sub>3</sub> ) <sub>1</sub> (HIO <sub>2</sub> ) <sub>3</sub>  | H <sub>2</sub> IO <sub>2</sub> <sup>+</sup> (H)⋯(O) NO <sub>3</sub> <sup>-</sup> | HB | 1.90 | 0.0269 | 0.0965 | 0.0011  |
|                  | HIO <sub>3</sub> (O)⋯(H) HIO <sub>2</sub>                                        | HB | 1.97 | 0.0243 | 0.0891 | 0.0017  |
| (HNO <sub>3</sub> ) <sub>1</sub> (HIO <sub>3</sub> ) <sub>1</sub> (HIO <sub>2</sub> ) <sub>4</sub>  | HIO <sub>2</sub> (O)⋯(I) HIO <sub>3</sub>                                        | XB | 2.16 | 0.0934 | 0.1714 | -0.0315 |
|                  | HIO <sub>2</sub> (O)⋯(I) HIO <sub>2</sub>                                        | XB | 2.31 | 0.0660 | 0.1523 | -0.0129 |
| (HNO <sub>3</sub> ) <sub>1</sub> (HIO <sub>3</sub> ) <sub>1</sub> (HIO <sub>2</sub> ) <sub>5</sub>  | NO <sub>3</sub> <sup>-</sup> (O)⋯(I) H <sub>2</sub> IO <sub>2</sub> <sup>+</sup> | XB | 2.43 | 0.0522 | 0.1275 | -0.0068 |
|                  | HIO <sub>2</sub> (H)⋯(O) HIO <sub>3</sub>                                        | HB | 1.76 | 0.0381 | 0.1083 | -0.0042 |
| (HNO <sub>3</sub> ) <sub>1</sub> (HIO <sub>3</sub> ) <sub>1</sub> (HIO <sub>2</sub> ) <sub>6</sub>  | HIO <sub>3</sub> (O)⋯(I) H <sub>2</sub> IO <sub>2</sub> <sup>+</sup>             | XB | 2.67 | 0.0310 | 0.0899 | -0.0003 |
|                  | NO <sub>3</sub> <sup>-</sup> (O)⋯(H) H <sub>2</sub> IO <sub>2</sub> <sup>+</sup> | HB | 1.98 | 0.0254 | 0.0857 | 0.0009  |
| (HNO <sub>3</sub> ) <sub>1</sub> (HIO <sub>3</sub> ) <sub>1</sub> (HIO <sub>2</sub> ) <sub>7</sub>  | HIO <sub>3</sub> (O)⋯(H) H <sub>2</sub> IO <sub>2</sub> <sup>+</sup>             | HB | 2.01 | 0.0231 | 0.0806 | 0.0014  |
|                  | HIO <sub>2</sub> (I)⋯(O) NO <sub>3</sub> <sup>-</sup>                            | XB | 2.96 | 0.0182 | 0.0531 | 0.0008  |
| (HNO <sub>3</sub> ) <sub>1</sub> (HIO <sub>3</sub> ) <sub>1</sub> (HIO <sub>2</sub> ) <sub>8</sub>  | HIO <sub>2</sub> (H)⋯(O) HIO <sub>3</sub>                                        | HB | 2.35 | 0.0122 | 0.0416 | 0.0010  |
|                  | HIO <sub>3</sub> (I)⋯(O) IO <sub>2</sub> <sup>-</sup>                            | XB | 2.23 | 0.0799 | 0.1553 | -0.0217 |
| (HNO <sub>3</sub> ) <sub>1</sub> (HIO <sub>3</sub> ) <sub>2</sub> (HIO <sub>2</sub> ) <sub>1</sub>  | H <sub>2</sub> IO <sub>2</sub> <sup>+</sup> (I)⋯(O) HIO <sub>2</sub>             | XB | 2.30 | 0.0685 | 0.1533 | -0.0142 |
|                  | IO <sub>2</sub> <sup>-</sup> (O)⋯(I) HIO <sub>2</sub>                            | XB | 2.50 | 0.0430 | 0.1203 | -0.0025 |
| (HNO <sub>3</sub> ) <sub>1</sub> (HIO <sub>3</sub> ) <sub>2</sub> (HIO <sub>2</sub> ) <sub>2</sub>  | HIO <sub>3</sub> (O)⋯(I) H <sub>2</sub> IO <sub>2</sub> <sup>+</sup>             | XB | 2.50 | 0.0420 | 0.1267 | -0.0017 |
|                  | H <sub>2</sub> IO <sub>2</sub> <sup>+</sup> (H)⋯(O) IO <sub>2</sub> <sup>-</sup> | HB | 1.76 | 0.0399 | 0.1039 | -0.0056 |
| (HNO <sub>3</sub> ) <sub>1</sub> (HIO <sub>3</sub> ) <sub>2</sub> (HIO <sub>2</sub> ) <sub>3</sub>  | HIO <sub>3</sub> (O)⋯(I) H <sub>2</sub> IO <sub>2</sub> <sup>+</sup>             | XB | 2.52 | 0.0395 | 0.1237 | -0.0008 |
|                  | NO <sub>3</sub> <sup>-</sup> (O)⋯(I) H <sub>2</sub> IO <sub>2</sub> <sup>+</sup> | XB | 2.62 | 0.0348 | 0.0964 | -0.0012 |
| (HNO <sub>3</sub> ) <sub>1</sub> (HIO <sub>3</sub> ) <sub>2</sub> (HIO <sub>2</sub> ) <sub>4</sub>  | NO <sub>3</sub> <sup>-</sup> (O)⋯(H) H <sub>2</sub> IO <sub>2</sub> <sup>+</sup> | HB | 1.88 | 0.0310 | 0.0977 | -0.0008 |
|                  | NO <sub>3</sub> <sup>-</sup> (O)⋯(H) H <sub>2</sub> IO <sub>2</sub> <sup>+</sup> | HB | 1.86 | 0.0308 | 0.1045 | -0.0001 |
| (HNO <sub>3</sub> ) <sub>1</sub> (HIO <sub>3</sub> ) <sub>2</sub> (HIO <sub>2</sub> ) <sub>5</sub>  | NO <sub>3</sub> <sup>-</sup> (O)⋯(H) HIO <sub>2</sub>                            | HB | 2.01 | 0.0202 | 0.0765 | 0.0021  |
|                  | HIO <sub>3</sub> (H)⋯(O) H <sub>2</sub> IO <sub>2</sub> <sup>+</sup>             | HB | 2.04 | 0.0202 | 0.0668 | 0.0011  |
| (HNO <sub>3</sub> ) <sub>1</sub> (HIO <sub>3</sub> ) <sub>2</sub> (HIO <sub>2</sub> ) <sub>6</sub>  | HIO <sub>3</sub> (I)⋯(O) HIO <sub>3</sub>                                        | XB | 2.24 | 0.0782 | 0.1505 | -0.0217 |
|                  | HIO <sub>3</sub> (O)⋯(H) HNO <sub>3</sub>                                        | HB | 1.58 | 0.0589 | 0.1112 | -0.0177 |
| (HNO <sub>3</sub> ) <sub>1</sub> (HIO <sub>3</sub> ) <sub>2</sub> (HIO <sub>2</sub> ) <sub>7</sub>  | HIO <sub>3</sub> (O)⋯(I) HIO <sub>3</sub>                                        | XB | 2.45 | 0.0514 | 0.1190 | -0.0070 |
|                  | HIO <sub>2</sub> (O)⋯(I) HIO <sub>3</sub>                                        | XB | 2.15 | 0.0947 | 0.1734 | -0.0325 |
| (HNO <sub>3</sub> ) <sub>1</sub> (HIO <sub>3</sub> ) <sub>2</sub> (HIO <sub>2</sub> ) <sub>8</sub>  | HIO <sub>3</sub> (I)⋯(O) HIO <sub>3</sub>                                        | XB | 2.30 | 0.0680 | 0.1463 | -0.0146 |
|                  | HNO <sub>3</sub> (H)⋯(O) HIO <sub>3</sub>                                        | HB | 1.60 | 0.0567 | 0.1131 | -0.0161 |
| (HNO <sub>3</sub> ) <sub>1</sub> (HIO <sub>3</sub> ) <sub>2</sub> (HIO <sub>2</sub> ) <sub>9</sub>  | HIO <sub>2</sub> (I)⋯(O) HIO <sub>3</sub>                                        | XB | 2.44 | 0.0472 | 0.1301 | -0.0040 |
|                  | HIO <sub>2</sub> (H)⋯(O) HNO <sub>3</sub>                                        | HB | 1.99 | 0.0188 | 0.0817 | 0.0030  |
| (HNO <sub>3</sub> ) <sub>1</sub> (HIO <sub>3</sub> ) <sub>2</sub> (HIO <sub>2</sub> ) <sub>10</sub> | HIO <sub>3</sub> (I)⋯(O) HIO <sub>2</sub>                                        | XB | 2.21 | 0.0844 | 0.1572 | -0.0251 |

|                                                                                     |                                                                                                    |                                                                                     |                                                                                                    |                                                                      |        |        |         |        |         |
|-------------------------------------------------------------------------------------|----------------------------------------------------------------------------------------------------|-------------------------------------------------------------------------------------|----------------------------------------------------------------------------------------------------|----------------------------------------------------------------------|--------|--------|---------|--------|---------|
| 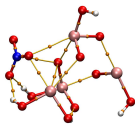   | (HNO <sub>3</sub> ) <sub>1</sub> (HIO <sub>3</sub> ) <sub>2</sub> (HIO <sub>2</sub> ) <sub>2</sub> | HIO <sub>3</sub> (O)⋯(I) HIO <sub>3</sub>                                           | XB                                                                                                 | 2.36                                                                 | 0.0560 | 0.1484 | -0.0068 |        |         |
|                                                                                     |                                                                                                    | HIO <sub>2</sub> (I)⋯(O) HIO <sub>3</sub>                                           | XB                                                                                                 | 2.45                                                                 | 0.0473 | 0.1265 | -0.0044 |        |         |
|                                                                                     |                                                                                                    | H <sub>2</sub> IO <sub>2</sub> <sup>+</sup> (I)⋯(O) NO <sub>3</sub> <sup>-</sup>    | XB                                                                                                 | 2.50                                                                 | 0.0465 | 0.1167 | -0.0046 |        |         |
|                                                                                     |                                                                                                    | HIO <sub>3</sub> (H)⋯(O) NO <sub>3</sub> <sup>-</sup>                               | HB                                                                                                 | 1.80                                                                 | 0.0335 | 0.0980 | -0.0028 |        |         |
|                                                                                     |                                                                                                    | H <sub>2</sub> IO <sub>2</sub> <sup>+</sup> (H)⋯(O) NO <sub>3</sub> <sup>-</sup>    | HB                                                                                                 | 1.91                                                                 | 0.0290 | 0.0970 | 0.0003  |        |         |
|                                                                                     |                                                                                                    | H <sub>2</sub> IO <sub>2</sub> <sup>+</sup> (I)⋯(O) HIO <sub>3</sub>                | XB                                                                                                 | 2.72                                                                 | 0.0278 | 0.0851 | 0.0006  |        |         |
|                                                                                     |                                                                                                    | H <sub>2</sub> IO <sub>2</sub> <sup>+</sup> (H)⋯(O) HIO <sub>3</sub>                | HB                                                                                                 | 1.93                                                                 | 0.0246 | 0.0884 | 0.0015  |        |         |
|    | (HNO <sub>3</sub> ) <sub>1</sub> (HIO <sub>3</sub> ) <sub>2</sub> (HIO <sub>2</sub> ) <sub>3</sub> | HIO <sub>2</sub> (O)⋯(I) HIO <sub>3</sub>                                           | XB                                                                                                 | 2.16                                                                 | 0.0920 | 0.1717 | -0.0303 |        |         |
|                                                                                     |                                                                                                    | IO <sub>3</sub> <sup>-</sup> (O)⋯(I) HIO <sub>2</sub>                               | XB                                                                                                 | 2.41                                                                 | 0.0497 | 0.1405 | -0.0045 |        |         |
|                                                                                     |                                                                                                    | HIO <sub>3</sub> (O)⋯(I) H <sub>2</sub> IO <sub>2</sub> <sup>+</sup>                | XB                                                                                                 | 2.49                                                                 | 0.0433 | 0.1197 | -0.0028 |        |         |
|                                                                                     |                                                                                                    | H <sub>2</sub> IO <sub>2</sub> <sup>+</sup> (I)⋯(O) NO <sub>3</sub> <sup>-</sup>    | XB                                                                                                 | 2.53                                                                 | 0.0424 | 0.1072 | -0.0037 |        |         |
|                                                                                     |                                                                                                    | IO <sub>3</sub> <sup>-</sup> (O)⋯(H) H <sub>2</sub> IO <sub>2</sub> <sup>+</sup>    | HB                                                                                                 | 1.73                                                                 | 0.0417 | 0.1065 | -0.0065 |        |         |
|                                                                                     |                                                                                                    | IO <sub>3</sub> <sup>-</sup> (O)⋯(H) H <sub>2</sub> IO <sub>2</sub> <sup>+</sup>    | HB                                                                                                 | 1.78                                                                 | 0.0371 | 0.1027 | -0.0038 |        |         |
|                                                                                     |                                                                                                    | IO <sub>3</sub> <sup>-</sup> (O)⋯(I) H <sub>2</sub> IO <sub>2</sub> <sup>+</sup>    | XB                                                                                                 | 2.64                                                                 | 0.0321 | 0.0964 | 0.0001  |        |         |
|                                                                                     |                                                                                                    | IO <sub>3</sub> <sup>-</sup> (I)⋯(O) HIO <sub>3</sub>                               | XB                                                                                                 | 2.73                                                                 | 0.0260 | 0.0833 | 0.0012  |        |         |
|                                                                                     |                                                                                                    | NO <sub>3</sub> <sup>-</sup> (O)⋯(H) H <sub>2</sub> IO <sub>2</sub> <sup>+</sup>    | HB                                                                                                 | 2.09                                                                 | 0.0177 | 0.0661 | 0.0020  |        |         |
|                                                                                     |                                                                                                    |    | (HNO <sub>3</sub> ) <sub>1</sub> (HIO <sub>3</sub> ) <sub>3</sub>                                  | HIO <sub>3</sub> (O)⋯(I) HIO <sub>3</sub>                            | XB     | 2.28   | 0.0691  | 0.1600 | -0.0140 |
| HIO <sub>3</sub> (I)⋯(O) HIO <sub>3</sub>                                           | XB                                                                                                 |                                                                                     |                                                                                                    | 2.30                                                                 | 0.0677 | 0.1441 | -0.0147 |        |         |
| HNO <sub>3</sub> (H)⋯(O) HIO <sub>3</sub>                                           | HB                                                                                                 |                                                                                     |                                                                                                    | 1.62                                                                 | 0.0520 | 0.1126 | -0.0133 |        |         |
| HIO <sub>3</sub> (O)⋯(I) HIO <sub>3</sub>                                           | XB                                                                                                 |                                                                                     |                                                                                                    | 2.47                                                                 | 0.0457 | 0.1238 | -0.0031 |        |         |
|  | (HNO <sub>3</sub> ) <sub>1</sub> (HIO <sub>3</sub> ) <sub>3</sub> (HIO <sub>2</sub> ) <sub>1</sub> |                                                                                     |                                                                                                    | HIO <sub>3</sub> (I)⋯(O) HIO <sub>3</sub>                            | XB     | 2.28   | 0.0707  | 0.1511 | -0.0163 |
|                                                                                     |                                                                                                    | HIO <sub>3</sub> (O)⋯(I) HIO <sub>3</sub>                                           | XB                                                                                                 | 2.31                                                                 | 0.0646 | 0.1527 | -0.0114 |        |         |
|                                                                                     |                                                                                                    | HIO <sub>3</sub> (O)⋯(H) H <sub>2</sub> IO <sub>2</sub> <sup>+</sup>                | HB                                                                                                 | 1.63                                                                 | 0.0520 | 0.1101 | -0.0132 |        |         |
|                                                                                     |                                                                                                    | HIO <sub>3</sub> (I)⋯(O) HIO <sub>3</sub>                                           | XB                                                                                                 | 2.46                                                                 | 0.0455 | 0.1215 | -0.0035 |        |         |
|                                                                                     |                                                                                                    | NO <sub>3</sub> <sup>-</sup> (O)⋯(H) H <sub>2</sub> IO <sub>2</sub> <sup>+</sup>    | HB                                                                                                 | 1.73                                                                 | 0.0444 | 0.1014 | -0.0082 |        |         |
|                                                                                     |                                                                                                    | HIO <sub>3</sub> (H)⋯(O) NO <sub>3</sub> <sup>-</sup>                               | HB                                                                                                 | 1.84                                                                 | 0.0330 | 0.0896 | -0.0029 |        |         |
|                                                                                     |                                                                                                    |  | (HNO <sub>3</sub> ) <sub>1</sub> (HIO <sub>3</sub> ) <sub>3</sub> (HIO <sub>2</sub> ) <sub>2</sub> | HIO <sub>3</sub> (O)⋯(I) HIO <sub>3</sub>                            | XB     | 2.21   | 0.0800  | 0.1687 | -0.0214 |
| HIO <sub>3</sub> (O)⋯(I) HIO <sub>2</sub>                                           | XB                                                                                                 |                                                                                     |                                                                                                    | 2.40                                                                 | 0.0525 | 0.1367 | -0.0064 |        |         |
| NO <sub>3</sub> <sup>-</sup> (O)⋯(I) HIO <sub>3</sub>                               | XB                                                                                                 |                                                                                     |                                                                                                    | 2.47                                                                 | 0.0505 | 0.1154 | -0.0062 |        |         |
| HIO <sub>3</sub> (I)⋯(O) HIO <sub>2</sub>                                           | XB                                                                                                 |                                                                                     |                                                                                                    | 2.45                                                                 | 0.0497 | 0.1232 | -0.0052 |        |         |
| HIO <sub>2</sub> (O)⋯(I) HIO <sub>3</sub>                                           | XB                                                                                                 |                                                                                     |                                                                                                    | 2.48                                                                 | 0.0475 | 0.1132 | -0.0049 |        |         |
| H <sub>2</sub> IO <sub>2</sub> <sup>+</sup> (I)⋯(O) HIO <sub>3</sub>                | XB                                                                                                 |                                                                                     |                                                                                                    | 2.46                                                                 | 0.0450 | 0.1320 | -0.0029 |        |         |
| HIO <sub>3</sub> (O)⋯(H) H <sub>2</sub> IO <sub>2</sub> <sup>+</sup>                | HB                                                                                                 |                                                                                     |                                                                                                    | 1.71                                                                 | 0.0433 | 0.1110 | -0.0075 |        |         |
| NO <sub>3</sub> <sup>-</sup> (O)⋯(H) H <sub>2</sub> IO <sub>2</sub> <sup>+</sup>    | HB                                                                                                 |                                                                                     |                                                                                                    | 1.77                                                                 | 0.0387 | 0.1033 | -0.0048 |        |         |
| HIO <sub>3</sub> (O)⋯(I) HIO <sub>3</sub>                                           | XB                                                                                                 |                                                                                     |                                                                                                    | 2.96                                                                 | 0.0170 | 0.0533 | 0.0013  |        |         |
| HIO <sub>2</sub> (H)⋯(O) HIO <sub>3</sub>                                           | HB                                                                                                 |                                                                                     |                                                                                                    | 2.19                                                                 | 0.0159 | 0.0565 | 0.0015  |        |         |
|  | (HNO <sub>3</sub> ) <sub>1</sub> (HIO <sub>3</sub> ) <sub>4</sub>                                  |                                                                                     |                                                                                                    | H <sub>2</sub> IO <sub>3</sub> <sup>+</sup> (I)⋯(O) HIO <sub>3</sub> | XB     | 2.21   | 0.0828  | 0.1632 | -0.0236 |
|                                                                                     |                                                                                                    |                                                                                     |                                                                                                    | HIO <sub>3</sub> (O)⋯(I) HIO <sub>3</sub>                            | XB     | 2.33   | 0.0609  | 0.1496 | -0.0094 |
|                                                                                     |                                                                                                    |                                                                                     |                                                                                                    | HIO <sub>3</sub> (I)⋯(O) H <sub>2</sub> IO <sub>3</sub> <sup>+</sup> | XB     | 2.35   | 0.0576  | 0.1467 | -0.0081 |
|                                                                                     |                                                                                                    |                                                                                     |                                                                                                    | H <sub>2</sub> IO <sub>3</sub> <sup>+</sup> (I)⋯(O) HIO <sub>3</sub> | XB     | 2.44   | 0.0492  | 0.1270 | -0.0047 |
|                                                                                     |                                                                                                    | NO <sub>3</sub> <sup>-</sup> (O)⋯(H) H <sub>2</sub> IO <sub>3</sub> <sup>+</sup>    | HB                                                                                                 | 1.69                                                                 | 0.0464 | 0.1033 | -0.0096 |        |         |
|                                                                                     |                                                                                                    | NO <sub>3</sub> <sup>-</sup> (O)⋯(H) HIO <sub>3</sub>                               | HB                                                                                                 | 1.72                                                                 | 0.0448 | 0.1060 | -0.0081 |        |         |
|                                                                                     |                                                                                                    | HIO <sub>3</sub> (O)⋯(H) H <sub>2</sub> IO <sub>3</sub> <sup>+</sup>                | HB                                                                                                 | 1.73                                                                 | 0.0417 | 0.1069 | -0.0067 |        |         |
|                                                                                     |                                                                                                    | HIO <sub>3</sub> (I)⋯(O) HIO <sub>3</sub>                                           | XB                                                                                                 | 2.74                                                                 | 0.0260 | 0.0804 | 0.0012  |        |         |

|                                                                                   |                                                                  |      |        |        |         |         |
|-----------------------------------------------------------------------------------|------------------------------------------------------------------|------|--------|--------|---------|---------|
| 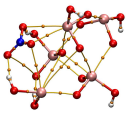 | $\text{HIO}_3(\text{I})\cdots(\text{O})\text{HIO}_3$             | XB   | 2.38   | 0.0548 | 0.1436  | -0.0064 |
|                                                                                   | $\text{HIO}_3(\text{O})\cdots(\text{I})\text{HIO}_3$             | XB   | 2.45   | 0.0506 | 0.1192  | -0.0066 |
|                                                                                   | $\text{HIO}_3(\text{H})\cdots(\text{O})\text{NO}_3^-$            | HB   | 1.67   | 0.0473 | 0.1102  | -0.0097 |
|                                                                                   | $\text{HIO}_3(\text{I})\cdots(\text{O})\text{HIO}_3$             | XB   | 2.48   | 0.0471 | 0.1148  | -0.0052 |
|                                                                                   | $\text{HIO}_3(\text{O})\cdots(\text{H})\text{H}_2\text{IO}_2^+$  | HB   | 1.67   | 0.0465 | 0.1111  | -0.0098 |
|                                                                                   | $\text{HIO}_3(\text{O})\cdots(\text{I})\text{H}_2\text{IO}_2^+$  | XB   | 2.50   | 0.0410 | 0.1219  | -0.0018 |
|                                                                                   | $\text{H}_2\text{IO}_2^+(\text{H})\cdots(\text{O})\text{NO}_3^-$ | HB   | 1.76   | 0.0398 | 0.1075  | -0.0050 |
|                                                                                   | $\text{HIO}_3(\text{O})\cdots(\text{I})\text{HIO}_3$             | XB   | 2.53   | 0.0389 | 0.1126  | -0.0012 |
|                                                                                   | $\text{HIO}_3(\text{I})\cdots(\text{O})\text{HIO}_3$             | XB   | 2.73   | 0.0279 | 0.0860  | 0.0010  |
|                                                                                   | $\text{HIO}_3(\text{I})\cdots(\text{O})\text{NO}_3^-$            | XB   | 2.78   | 0.0275 | 0.0740  | -0.0002 |
|                                                                                   | $\text{HIO}_3(\text{I})\cdots(\text{O})\text{HIO}_3$             | XB   | 2.73   | 0.0272 | 0.0843  | 0.0009  |
|                                                                                   | $\text{HIO}_3(\text{I})\cdots(\text{O})\text{HIO}_3$             | XB   | 2.35   | 0.0591 | 0.1471  | -0.0086 |
|                                                                                   | $\text{HIO}_3(\text{O})\cdots(\text{H})\text{HIO}_3$             | HB   | 1.59   | 0.0572 | 0.1103  | -0.0168 |
|                                                                                   | $\text{HNO}_3(\text{H})\cdots(\text{O})\text{HIO}_3$             | HB   | 1.62   | 0.0533 | 0.1091  | -0.0142 |
| $\text{HIO}_3(\text{O})\cdots(\text{I})\text{HIO}_3$                              | XB                                                               | 2.41 | 0.0530 | 0.1253 | -0.0073 |         |
| $\text{HIO}_3(\text{I})\cdots(\text{O})\text{HIO}_3$                              | XB                                                               | 2.42 | 0.0506 | 0.1344 | -0.0050 |         |
| $\text{HIO}_3(\text{O})\cdots(\text{I})\text{HIO}_3$                              | XB                                                               | 2.44 | 0.0477 | 0.1299 | -0.0036 |         |
| $\text{HIO}_3(\text{I})\cdots(\text{O})\text{HIO}_3$                              | XB                                                               | 2.57 | 0.0352 | 0.1038 | -0.0003 |         |
| $\text{HIO}_3(\text{I})\cdots(\text{O})\text{HIO}_3$                              | XB                                                               | 2.83 | 0.0241 | 0.0695 | 0.0001  |         |
| $\text{HIO}_3(\text{I})\cdots(\text{O})\text{HIO}_3$                              | XB                                                               | 2.80 | 0.0232 | 0.0748 | 0.0015  |         |
| $\text{HIO}_3(\text{O})\cdots(\text{I})\text{HIO}_3$                              | XB                                                               | 2.92 | 0.0197 | 0.0587 | 0.0009  |         |
| $\text{HIO}_3(\text{O})\cdots(\text{I})\text{HIO}_3$                              | XB                                                               | 2.94 | 0.0177 | 0.0572 | 0.0015  |         |
| $\text{HNO}_3(\text{O})\cdots(\text{H})\text{HIO}_3$                              | HB                                                               | 2.19 | 0.0142 | 0.0515 | 0.0017  |         |
| $\text{HNO}_3(\text{O})\cdots(\text{H})\text{HNO}_3$                              | HB                                                               | 1.73 | 0.0401 | 0.1056 | -0.0061 |         |
| $\text{HNO}_3(\text{H})\cdots(\text{O})\text{HNO}_3$                              | HB                                                               | 1.73 | 0.0401 | 0.1056 | -0.0061 |         |
| $\text{HIO}_2(\text{O})\cdots(\text{H})\text{HNO}_3$                              | HB                                                               | 1.55 | 0.0680 | 0.1082 | -0.0233 |         |
| $\text{HIO}_2(\text{O})\cdots(\text{H})\text{HNO}_3$                              | HB                                                               | 1.58 | 0.0617 | 0.1062 | -0.0196 |         |
| $\text{HIO}_2(\text{I})\cdots(\text{O})\text{HNO}_3$                              | XB                                                               | 2.67 | 0.0289 | 0.0890 | 0.0002  |         |
| $\text{HIO}_2(\text{H})\cdots(\text{O})\text{HNO}_3$                              | HB                                                               | 1.97 | 0.0221 | 0.0870 | 0.0023  |         |
| $\text{NO}_3^-(\text{O})\cdots(\text{I})\text{H}_2\text{IO}_2^+$                  | XB                                                               | 2.41 | 0.0551 | 0.1264 | -0.0085 |         |
| $\text{H}_2\text{IO}_2^+(\text{I})\cdots(\text{O})\text{NO}_3^-$                  | XB                                                               | 2.41 | 0.0551 | 0.1264 | -0.0085 |         |
| $\text{H}_2\text{IO}_2^+(\text{H})\cdots(\text{O})\text{NO}_3^-$                  | HB                                                               | 1.78 | 0.0381 | 0.1070 | -0.0040 |         |
| $\text{NO}_3^-(\text{O})\cdots(\text{H})\text{H}_2\text{IO}_2^+$                  | HB                                                               | 1.78 | 0.0381 | 0.1070 | -0.0040 |         |
| $\text{H}_2\text{IO}_2^+(\text{I})\cdots(\text{O})\text{NO}_3^-$                  | XB                                                               | 2.91 | 0.0201 | 0.0665 | 0.0006  |         |
| $\text{NO}_3^-(\text{O})\cdots(\text{I})\text{H}_2\text{IO}_2^+$                  | XB                                                               | 2.91 | 0.0201 | 0.0665 | 0.0006  |         |
| $\text{NO}_3^-(\text{O})\cdots(\text{H})\text{H}_2\text{IO}_2^+$                  | HB                                                               | 2.27 | 0.0113 | 0.0430 | 0.0016  |         |
| $\text{H}_2\text{IO}_2^+(\text{H})\cdots(\text{O})\text{NO}_3^-$                  | HB                                                               | 2.27 | 0.0113 | 0.0430 | 0.0016  |         |
| $\text{HIO}_2(\text{O})\cdots(\text{I})\text{H}_2\text{IO}_2^+$                   | XB                                                               | 2.28 | 0.0692 | 0.1597 | -0.0144 |         |
| $\text{H}_2\text{IO}_2^+(\text{I})\cdots(\text{O})\text{NO}_3^-$                  | XB                                                               | 2.33 | 0.0643 | 0.1394 | -0.0130 |         |
| $\text{NO}_3^-(\text{O})\cdots(\text{H})\text{H}_2\text{IO}_2^+$                  | HB                                                               | 1.64 | 0.0531 | 0.1090 | -0.0138 |         |
| $\text{NO}_3^-(\text{O})\cdots(\text{I})\text{HIO}_2$                             | XB                                                               | 2.44 | 0.0494 | 0.1266 | -0.0054 |         |
| $\text{NO}_3^-(\text{O})\cdots(\text{H})\text{H}_2\text{IO}_2^+$                  | HB                                                               | 1.88 | 0.0297 | 0.0914 | -0.0010 |         |
| $\text{NO}_3^-(\text{O})\cdots(\text{H})\text{H}_2\text{IO}_2^+$                  | HB                                                               | 1.94 | 0.0240 | 0.0896 | 0.0018  |         |

|                                                                                     |                                                    |    |      |        |        |         |
|-------------------------------------------------------------------------------------|----------------------------------------------------|----|------|--------|--------|---------|
|                                                                                     | $\text{H}_2\text{IO}_2^+$ (O)⋯(H)                  | HB | 1.96 | 0.0239 | 0.0817 | 0.0009  |
|                                                                                     | $\text{H}_2\text{IO}_2^+$                          |    |      |        |        |         |
|                                                                                     | $\text{H}_2\text{IO}_2^+$ (I)⋯(O) $\text{NO}_3^-$  | XB | 2.88 | 0.0211 | 0.0730 | 0.0006  |
|                                                                                     | $\text{HIO}_2$ (O)⋯(I) $\text{H}_2\text{IO}_2^+$   | XB | 2.30 | 0.0686 | 0.1513 | -0.0146 |
|                                                                                     | $\text{NO}_3^-$ (O)⋯(I) $\text{H}_2\text{IO}_2^+$  | XB | 2.57 | 0.0393 | 0.1011 | -0.0028 |
|                                                                                     | $\text{H}_2\text{IO}_2^+$ (I)⋯(O) $\text{HIO}_2$   | XB | 2.56 | 0.0389 | 0.1042 | -0.0020 |
|                                                                                     | $\text{NO}_3^-$ (O)⋯(H) $\text{HIO}_2$             | HB | 1.79 | 0.0378 | 0.0999 | -0.0046 |
|                                                                                     | $\text{NO}_3^-$ (O)⋯(H) $\text{H}_2\text{IO}_2^+$  | HB | 1.79 | 0.0369 | 0.1038 | -0.0037 |
|                                                                                     | $\text{HIO}_2$ (I)⋯(O) $\text{NO}_3^-$             | XB | 2.71 | 0.0293 | 0.0808 | -0.0005 |
|                                                                                     | $\text{H}_2\text{IO}_2^+$ (H)⋯(O) $\text{NO}_3^-$  | HB | 1.89 | 0.0281 | 0.0990 | 0.0007  |
|                                                                                     | $\text{HIO}_2$ (H)⋯(O) $\text{NO}_3^-$             | HB | 1.90 | 0.0280 | 0.0929 | 0.0002  |
|                                                                                     | $\text{H}_2\text{IO}_2^+$ (I)⋯(O) $\text{NO}_3^-$  | XB | 2.97 | 0.0176 | 0.0582 | 0.0007  |
| 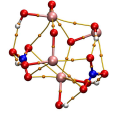   | $(\text{HNO}_3)_2(\text{HIO}_2)_4$                 |    |      |        |        |         |
|                                                                                     | $\text{HIO}_3$ (O)⋯(H) $\text{HNO}_3$              | HB | 1.61 | 0.0574 | 0.1109 | -0.0162 |
|                                                                                     | $\text{HIO}_3$ (O)⋯(H) $\text{HNO}_3$              | HB | 1.65 | 0.0493 | 0.1091 | -0.0117 |
|                                                                                     | $\text{HIO}_3$ (H)⋯(O) $\text{HNO}_3$              | HB | 1.79 | 0.0330 | 0.1042 | -0.0020 |
|                                                                                     | $\text{HIO}_3$ (I)⋯(O) $\text{HNO}_3$              | XB | 2.69 | 0.0287 | 0.0849 | 0.0003  |
|    | $(\text{HNO}_3)_2(\text{HIO}_3)_1$                 |    |      |        |        |         |
|                                                                                     | $\text{NO}_3^-$ (O)⋯(I) $\text{HIO}_3$             | XB | 2.34 | 0.0637 | 0.1305 | -0.0127 |
|                                                                                     | $\text{HIO}_3$ (O)⋯(H) $\text{HNO}_3$              | HB | 1.58 | 0.0615 | 0.1081 | -0.0194 |
|                                                                                     | $\text{H}_2\text{IO}_2^+$ (H)⋯(O) $\text{HIO}_3$   | HB | 1.62 | 0.0555 | 0.1064 | -0.0156 |
|                                                                                     | $\text{NO}_3^-$ (O)⋯(H) $\text{H}_2\text{IO}_2^+$  | HB | 1.74 | 0.0428 | 0.1029 | -0.0073 |
|                                                                                     | $\text{H}_2\text{IO}_2^+$ (I)⋯(O) $\text{HNO}_3$   | XB | 2.74 | 0.0231 | 0.0815 | 0.0017  |
|   | $(\text{HNO}_3)_2(\text{HIO}_3)_1(\text{HIO}_2)_1$ |    |      |        |        |         |
|                                                                                     | $\text{HIO}_3$ (I)⋯(O) $\text{HIO}_2$              | XB | 2.18 | 0.0888 | 0.1688 | -0.0279 |
|                                                                                     | $\text{H}_2\text{IO}_2^+$ (I)⋯(O) $\text{HIO}_3$   | XB | 2.36 | 0.0557 | 0.1524 | -0.0069 |
|                                                                                     | $\text{NO}_3^-$ (O)⋯(I) $\text{HIO}_2$             | XB | 2.41 | 0.0532 | 0.1275 | -0.0074 |
|                                                                                     | $\text{HNO}_3$ (H)⋯(O) $\text{HIO}_3$              | HB | 1.64 | 0.0511 | 0.1088 | -0.0127 |
|                                                                                     | $\text{H}_2\text{IO}_2^+$ (H)⋯(O) $\text{NO}_3^-$  | HB | 1.81 | 0.0340 | 0.1081 | -0.0016 |
|                                                                                     | $\text{HNO}_3$ (O)⋯(H) $\text{HIO}_3$              | HB | 1.88 | 0.0262 | 0.0925 | 0.0006  |
|                                                                                     | $\text{H}_2\text{IO}_2^+$ (H)⋯(O) $\text{NO}_3^-$  | HB | 1.99 | 0.0216 | 0.0790 | 0.0018  |
|                                                                                     | $\text{HIO}_3$ (O)⋯(H) $\text{HIO}_2$              | HB | 2.06 | 0.0201 | 0.0747 | 0.0020  |
|  | $(\text{HNO}_3)_2(\text{HIO}_3)_1(\text{HIO}_2)_2$ |    |      |        |        |         |
|                                                                                     | $\text{H}_2\text{IO}_2^+$ (I)⋯(O) $\text{IO}_3^-$  | XB | 2.38 | 0.0535 | 0.1493 | -0.0059 |
|                                                                                     | $\text{NO}_3^-$ (O)⋯(I) $\text{H}_2\text{IO}_2^+$  | XB | 2.52 | 0.0431 | 0.1090 | -0.0038 |
|                                                                                     | $\text{H}_2\text{IO}_2^+$ (I)⋯(O) $\text{NO}_3^-$  | XB | 2.53 | 0.0424 | 0.1080 | -0.0036 |
|                                                                                     | $\text{H}_2\text{IO}_2^+$ (H)⋯(O) $\text{NO}_3^-$  | HB | 1.77 | 0.0388 | 0.1078 | -0.0045 |
|                                                                                     | $\text{H}_2\text{IO}_2^+$ (H)⋯(O) $\text{IO}_3^-$  | HB | 1.80 | 0.0351 | 0.1006 | -0.0030 |
|                                                                                     | $\text{IO}_3^-$ (O)⋯(H) $\text{H}_2\text{IO}_2^+$  | HB | 1.82 | 0.0334 | 0.0998 | -0.0020 |
|                                                                                     | $\text{IO}_3^-$ (O)⋯(I) $\text{H}_2\text{IO}_2^+$  | XB | 2.65 | 0.0310 | 0.0920 | 0.0000  |
|                                                                                     | $\text{NO}_3^-$ (O)⋯(H) $\text{H}_2\text{IO}_2^+$  | HB | 1.93 | 0.0259 | 0.0886 | 0.0007  |
|                                                                                     | $\text{H}_2\text{IO}_2^+$ (I)⋯(O) $\text{NO}_3^-$  | XB | 2.79 | 0.0244 | 0.0736 | 0.0007  |
|                                                                                     | $\text{NO}_3^-$ (O)⋯(I) $\text{H}_2\text{IO}_2^+$  | XB | 2.96 | 0.0184 | 0.0603 | 0.0006  |
|                                                                                     | $\text{IO}_3^-$ (I)⋯(O) $\text{NO}_3^-$            | XB | 2.87 | 0.0174 | 0.0645 | 0.0020  |
|  | $(\text{HNO}_3)_2(\text{HIO}_3)_1(\text{HIO}_2)_3$ |    |      |        |        |         |
|                                                                                     | $\text{HIO}_3$ (O)⋯(I) $\text{HIO}_3$              | XB | 2.27 | 0.0742 | 0.1440 | -0.0192 |
|                                                                                     | $\text{HIO}_3$ (I)⋯(O) $\text{HIO}_3$              | XB | 2.27 | 0.0742 | 0.1440 | -0.0192 |
|                                                                                     | $\text{HNO}_3$ (H)⋯(O) $\text{HIO}_3$              | HB | 1.63 | 0.0516 | 0.1111 | -0.0130 |
|                                                                                     | $\text{HIO}_3$ (O)⋯(H) $\text{HNO}_3$              | HB | 1.63 | 0.0516 | 0.1111 | -0.0130 |

|                                                                                                    |                                                                                     |                                                                                  |    |      |        |        |         |
|----------------------------------------------------------------------------------------------------|-------------------------------------------------------------------------------------|----------------------------------------------------------------------------------|----|------|--------|--------|---------|
|                                                                                                    | 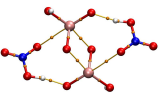   | HNO <sub>3</sub> (O)⋯(I) HIO <sub>3</sub>                                        | XB | 2.84 | 0.0207 | 0.0696 | 0.0017  |
|                                                                                                    |                                                                                     | HIO <sub>3</sub> (I)⋯(O) HNO <sub>3</sub>                                        | XB | 2.84 | 0.0207 | 0.0696 | 0.0017  |
| (HNO <sub>3</sub> ) <sub>2</sub> (HIO <sub>3</sub> ) <sub>2</sub>                                  |    | NO <sub>3</sub> <sup>-</sup> (O)⋯(I) HIO <sub>3</sub>                            | XB | 2.33 | 0.0655 | 0.1316 | -0.0137 |
|                                                                                                    |                                                                                     | HIO <sub>3</sub> (O)⋯(H) HNO <sub>3</sub>                                        | HB | 1.62 | 0.0552 | 0.1078 | -0.0152 |
|                                                                                                    |                                                                                     | HIO <sub>3</sub> (I)⋯(O) HIO <sub>3</sub>                                        | XB | 2.43 | 0.0484 | 0.1296 | -0.0040 |
|                                                                                                    |                                                                                     | H <sub>2</sub> IO <sub>2</sub> <sup>+</sup> (H)⋯(O) HIO <sub>3</sub>             | HB | 1.67 | 0.0476 | 0.1076 | -0.0105 |
|                                                                                                    |                                                                                     | H <sub>2</sub> IO <sub>2</sub> <sup>+</sup> (H)⋯(O) NO <sub>3</sub> <sup>-</sup> | HB | 1.79 | 0.0374 | 0.0997 | -0.0044 |
|                                                                                                    |                                                                                     | H <sub>2</sub> IO <sub>2</sub> <sup>+</sup> (I)⋯(O) HIO <sub>3</sub>             | XB | 2.64 | 0.0324 | 0.0922 | -0.0007 |
| (HNO <sub>3</sub> ) <sub>2</sub> (HIO <sub>3</sub> ) <sub>2</sub> (HIO <sub>2</sub> ) <sub>1</sub> |                                                                                     | HNO <sub>3</sub> (O)⋯(H) HIO <sub>3</sub>                                        | HB | 1.96 | 0.0235 | 0.0844 | 0.0014  |
|                                                                                                    |                                                                                     | HIO <sub>3</sub> (H)⋯(O) NO <sub>3</sub> <sup>-</sup>                            | HB | 1.49 | 0.0784 | 0.0920 | -0.0316 |
|                                                                                                    |                                                                                     | H <sub>2</sub> IO <sub>2</sub> <sup>+</sup> (I)⋯(O) NO <sub>3</sub> <sup>-</sup> | XB | 2.50 | 0.0437 | 0.1213 | -0.0029 |
|                                                                                                    |                                                                                     | H <sub>2</sub> IO <sub>2</sub> <sup>+</sup> (H)⋯(O) HIO <sub>3</sub>             | HB | 1.73 | 0.0404 | 0.1132 | -0.0053 |
|                                                                                                    |                                                                                     | NO <sub>3</sub> <sup>-</sup> (O)⋯(H) H <sub>2</sub> IO <sub>2</sub> <sup>+</sup> | HB | 1.76 | 0.0399 | 0.1037 | -0.0054 |
|                                                                                                    |                                                                                     | HIO <sub>3</sub> (O)⋯(H) H <sub>2</sub> IO <sub>2</sub> <sup>+</sup>             | HB | 1.78 | 0.0368 | 0.1174 | -0.0023 |
|                                                                                                    |                                                                                     | NO <sub>3</sub> <sup>-</sup> (O)⋯(H) HIO <sub>3</sub>                            | HB | 1.80 | 0.0340 | 0.1010 | -0.0024 |
|                                                                                                    |   | HIO <sub>3</sub> (O)⋯(I) H <sub>2</sub> IO <sub>2</sub> <sup>+</sup>             | XB | 2.62 | 0.0328 | 0.1017 | 0.0002  |
|                                                                                                    |                                                                                     | HIO <sub>3</sub> (I)⋯(O) NO <sub>3</sub> <sup>-</sup>                            | XB | 2.70 | 0.0271 | 0.0810 | 0.0005  |
|                                                                                                    |                                                                                     | H <sub>2</sub> IO <sub>2</sub> <sup>+</sup> (I)⋯(O) HIO <sub>3</sub>             | XB | 2.72 | 0.0255 | 0.0861 | 0.0015  |
|                                                                                                    |                                                                                     | NO <sub>3</sub> <sup>-</sup> (O)⋯(I) H <sub>2</sub> IO <sub>2</sub> <sup>+</sup> | XB | 2.91 | 0.0186 | 0.0561 | 0.0010  |
| (HNO <sub>3</sub> ) <sub>2</sub> (HIO <sub>3</sub> ) <sub>2</sub> (HIO <sub>2</sub> ) <sub>2</sub> |                                                                                     | H <sub>2</sub> IO <sub>2</sub> <sup>+</sup> (H)⋯(O) NO <sub>3</sub> <sup>-</sup> | HB | 2.06 | 0.0181 | 0.0723 | 0.0025  |
|                                                                                                    |                                                                                     | HIO <sub>3</sub> (I)⋯(O) HIO <sub>3</sub>                                        | XB | 2.31 | 0.0664 | 0.1429 | -0.0140 |
|                                                                                                    |                                                                                     | HIO <sub>3</sub> (O)⋯(I) HIO <sub>3</sub>                                        | XB | 2.30 | 0.0644 | 0.1559 | -0.0113 |
|                                                                                                    |                                                                                     | HNO <sub>3</sub> (H)⋯(O) HIO <sub>3</sub>                                        | HB | 1.62 | 0.0529 | 0.1103 | -0.0138 |
|                                                                                                    |                                                                                     | HIO <sub>3</sub> (O)⋯(H) HNO <sub>3</sub>                                        | HB | 1.63 | 0.0512 | 0.1120 | -0.0128 |
|                                                                                                    |                                                                                     | HIO <sub>3</sub> (O)⋯(I) HIO <sub>3</sub>                                        | XB | 2.46 | 0.0469 | 0.1269 | -0.0035 |
|                                                                                                    |  | HNO <sub>3</sub> (O)⋯(H) HIO <sub>3</sub>                                        | HB | 1.82 | 0.0306 | 0.1005 | -0.0010 |
|                                                                                                    |                                                                                     | HIO <sub>3</sub> (O)⋯(I) HIO <sub>3</sub>                                        | XB | 2.85 | 0.0236 | 0.0703 | 0.0002  |
| (HNO <sub>3</sub> ) <sub>2</sub> (HIO <sub>3</sub> ) <sub>3</sub>                                  |                                                                                     | HIO <sub>3</sub> (I)⋯(O) HNO <sub>3</sub>                                        | XB | 2.82 | 0.0218 | 0.0705 | 0.0013  |
|                                                                                                    |                                                                                     | HIO <sub>3</sub> (I)⋯(O) HIO <sub>3</sub>                                        | XB | 2.27 | 0.0724 | 0.1496 | -0.0176 |
|                                                                                                    |                                                                                     | HIO <sub>3</sub> (O)⋯(I) HIO <sub>3</sub>                                        | XB | 2.41 | 0.0518 | 0.1332 | -0.0053 |
|                                                                                                    |                                                                                     | HIO <sub>3</sub> (O)⋯(H) HNO <sub>3</sub>                                        | HB | 1.64 | 0.0500 | 0.1138 | -0.0117 |
|                                                                                                    |                                                                                     | NO <sub>3</sub> <sup>-</sup> (O)⋯(H) H <sub>2</sub> IO <sub>2</sub> <sup>+</sup> | HB | 1.69 | 0.0481 | 0.1068 | -0.0102 |
|                                                                                                    |                                                                                     | HIO <sub>3</sub> (H)⋯(O) NO <sub>3</sub> <sup>-</sup>                            | HB | 1.70 | 0.0453 | 0.1024 | -0.0088 |
|                                                                                                    |                                                                                     | HIO <sub>3</sub> (O)⋯(H) H <sub>2</sub> IO <sub>2</sub> <sup>+</sup>             | HB | 1.70 | 0.0446 | 0.1054 | -0.0087 |
|                                                                                                    |                                                                                     | HIO <sub>3</sub> (I)⋯(O) HIO <sub>3</sub>                                        | XB | 2.52 | 0.0401 | 0.1140 | -0.0015 |
|                                                                                                    |                                                                                     | H <sub>2</sub> IO <sub>2</sub> <sup>+</sup> (I)⋯(O) HIO <sub>3</sub>             | XB | 2.63 | 0.0309 | 0.0990 | 0.0007  |
|                                                                                                    |                                                                                     | HIO <sub>3</sub> (O)⋯(I) HIO <sub>3</sub>                                        | XB | 2.86 | 0.0230 | 0.0696 | 0.0002  |
|                                                                                                    |                                                                                     | HIO <sub>3</sub> (I)⋯(O) NO <sub>3</sub> <sup>-</sup>                            | XB | 3.09 | 0.0155 | 0.0435 | 0.0005  |
|                                                                                                    |  | HIO <sub>3</sub> (O)⋯(I) H <sub>2</sub> IO <sub>2</sub> <sup>+</sup>             | XB | 3.12 | 0.0154 | 0.0458 | 0.0011  |
| (HNO <sub>3</sub> ) <sub>2</sub> (HIO <sub>3</sub> ) <sub>3</sub> (HIO <sub>2</sub> ) <sub>1</sub> |                                                                                     | NO <sub>3</sub> <sup>-</sup> (O)⋯(O) HIO <sub>3</sub>                            | HB | 2.79 | 0.0153 | 0.0566 | 0.0008  |

|                                                                                     |                                                             |    |      |        |        |         |
|-------------------------------------------------------------------------------------|-------------------------------------------------------------|----|------|--------|--------|---------|
|                                                                                     | $\text{HIO}_3$ (O)⋯(I) $\text{HIO}_3$                       | XB | 2.24 | 0.0735 | 0.1693 | -0.0165 |
|                                                                                     | $\text{HNO}_3$ (H)⋯(O) $\text{HIO}_3$                       | HB | 1.58 | 0.0604 | 0.1086 | -0.0187 |
|                                                                                     | $\text{HIO}_3$ (O)⋯(I) $\text{HIO}_3$                       | XB | 2.35 | 0.0581 | 0.1481 | -0.0080 |
|                                                                                     | $\text{HIO}_3$ (O)⋯(H) $\text{HNO}_3$                       | HB | 1.61 | 0.0545 | 0.1108 | -0.0150 |
|                                                                                     | $\text{HIO}_3$ (O)⋯(I) $\text{HIO}_3$                       | XB | 2.42 | 0.0492 | 0.1387 | -0.0039 |
|                                                                                     | $\text{HIO}_3$ (I)⋯(O) $\text{HIO}_3$                       | XB | 2.53 | 0.0395 | 0.1165 | -0.0009 |
|                                                                                     | $\text{HIO}_3$ (I)⋯(O) $\text{HIO}_3$                       | XB | 2.77 | 0.0251 | 0.0812 | 0.0014  |
|                                                                                     | $\text{HIO}_3$ (H)⋯(O) $\text{HNO}_3$                       | HB | 1.92 | 0.0244 | 0.0868 | 0.0011  |
|                                                                                     | $\text{HIO}_3$ (H)⋯(O) $\text{HNO}_3$                       | HB | 2.03 | 0.0197 | 0.0696 | 0.0015  |
| 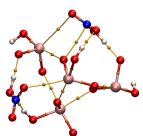   | $(\text{HNO}_3)_2(\text{HIO}_3)_4$                          |    |      |        |        |         |
|    | $(\text{HNO}_3)_3$                                          |    |      |        |        |         |
|    | $(\text{HNO}_3)_3(\text{HIO}_2)_1$                          |    |      |        |        |         |
|  | $(\text{HNO}_3)_3(\text{HIO}_2)_2$                          |    |      |        |        |         |
|  | $(\text{HNO}_3)_3(\text{HIO}_2)_3$                          |    |      |        |        |         |
|  | $(\text{HNO}_3)_3(\text{HIO}_3)_1$                          |    |      |        |        |         |
|                                                                                     | $\text{HNO}_3$ (H)⋯(O) $\text{HNO}_3$                       | HB | 1.75 | 0.0376 | 0.1039 | -0.0047 |
|                                                                                     | $\text{HNO}_3$ (O)⋯(H) $\text{HNO}_3$                       | HB | 1.76 | 0.0357 | 0.1061 | -0.0036 |
|                                                                                     | $\text{HNO}_3$ (H)⋯(O) $\text{HNO}_3$                       | HB | 1.80 | 0.0318 | 0.1003 | -0.0018 |
|                                                                                     | $\text{HNO}_3$ (H)⋯(O) $\text{HIO}_2$                       | HB | 1.54 | 0.0690 | 0.1081 | -0.0240 |
|                                                                                     | $\text{HIO}_2$ (O)⋯(H) $\text{HNO}_3$                       | HB | 1.57 | 0.0639 | 0.1059 | -0.0210 |
|                                                                                     | $\text{HNO}_3$ (H)⋯(O) $\text{HIO}_2$                       | HB | 1.73 | 0.0421 | 0.1060 | -0.0069 |
|                                                                                     | $\text{HNO}_3$ (O)⋯(I) $\text{HIO}_2$                       | XB | 2.61 | 0.0326 | 0.0982 | -0.0004 |
|                                                                                     | $\text{HIO}_2$ (H)⋯(O) $\text{HNO}_3$                       | HB | 1.84 | 0.0301 | 0.1055 | 0.0000  |
|                                                                                     | $\text{HNO}_3$ (O)⋯(I) $\text{HIO}_2$                       | XB | 2.86 | 0.0195 | 0.0652 | 0.0014  |
|                                                                                     | $\text{NO}_3^-$ (O)⋯(I) $\text{H}_2\text{IO}_2^+$           | XB | 2.35 | 0.0614 | 0.1352 | -0.0113 |
|                                                                                     | $\text{H}_2\text{IO}_2^+$ (I)⋯(O) $\text{NO}_3^-$           | XB | 2.42 | 0.0531 | 0.1243 | -0.0074 |
|                                                                                     | $\text{HNO}_3$ (H)⋯(O) $\text{H}_2\text{IO}_2^+$            | HB | 1.68 | 0.0486 | 0.1086 | -0.0105 |
|                                                                                     | $\text{H}_2\text{IO}_2^+$ (H)⋯(O) $\text{NO}_3^-$           | HB | 1.79 | 0.0363 | 0.1062 | -0.0031 |
|                                                                                     | $\text{NO}_3^-$ (O)⋯(H) $\text{H}_2\text{IO}_2^+$           | HB | 1.80 | 0.0352 | 0.1054 | -0.0025 |
|                                                                                     | $\text{HNO}_3$ (O)⋯(I) $\text{H}_2\text{IO}_2^+$            | XB | 2.82 | 0.0211 | 0.0686 | 0.0012  |
|                                                                                     | $\text{H}_2\text{IO}_2^+$ (H)⋯(O) $\text{NO}_3^-$           | HB | 2.02 | 0.0200 | 0.0760 | 0.0021  |
|                                                                                     | $\text{NO}_3^-$ (O)⋯(H) $\text{H}_2\text{IO}_2^+$           | HB | 2.20 | 0.0135 | 0.0512 | 0.0019  |
|                                                                                     | $\text{H}_2\text{IO}_2^+$ (I)⋯(O) $\text{NO}_3^-$           | XB | 2.32 | 0.0653 | 0.1397 | -0.0135 |
|                                                                                     | $\text{HIO}_2$ (O)⋯(H) $\text{HNO}_3$                       | HB | 1.60 | 0.0587 | 0.1077 | -0.0177 |
|                                                                                     | $\text{NO}_3^-$ (O)⋯(I) $\text{HIO}_2$                      | XB | 2.41 | 0.0533 | 0.1319 | -0.0072 |
|                                                                                     | $\text{NO}_3^-$ (O)⋯(H) $\text{H}_2\text{IO}_2^+$           | HB | 1.66 | 0.0502 | 0.1083 | -0.0120 |
|                                                                                     | $\text{HIO}_2$ (O)⋯(I) $\text{H}_2\text{IO}_2^+$            | XB | 2.43 | 0.0501 | 0.1311 | -0.0052 |
|                                                                                     | $\text{NO}_3^-$ (O)⋯(H) $\text{H}_2\text{IO}_2^+$           | HB | 1.82 | 0.0338 | 0.0968 | -0.0028 |
|                                                                                     | $\text{H}_2\text{IO}_2^+$ (O)⋯(H) $\text{H}_2\text{IO}_2^+$ | HB | 1.94 | 0.0250 | 0.0839 | 0.0006  |
|                                                                                     | $\text{H}_2\text{IO}_2^+$ (H)⋯(O) $\text{NO}_3^-$           | HB | 1.96 | 0.0236 | 0.0871 | 0.0018  |
|                                                                                     | $\text{H}_2\text{IO}_2^+$ (I)⋯(O) $\text{NO}_3^-$           | XB | 2.87 | 0.0215 | 0.0738 | 0.0006  |
|                                                                                     | $\text{H}_2\text{IO}_2^+$ (I)⋯(O) $\text{HNO}_3$            | XB | 2.93 | 0.0171 | 0.0565 | 0.0014  |
|                                                                                     | $\text{HNO}_3$ (H)⋯(O) $\text{HIO}_3$                       | HB | 1.61 | 0.0569 | 0.1114 | -0.0158 |
|                                                                                     | $\text{HIO}_3$ (O)⋯(H) $\text{HNO}_3$                       | HB | 1.67 | 0.0483 | 0.1086 | -0.0107 |
|                                                                                     | $\text{HNO}_3$ (H)⋯(O) $\text{HIO}_3$                       | HB | 1.70 | 0.0444 | 0.1054 | -0.0087 |
|                                                                                     | $\text{HNO}_3$ (O)⋯(I) $\text{HIO}_3$                       | XB | 2.66 | 0.0304 | 0.0890 | 0.0001  |
|                                                                                     | $\text{HNO}_3$ (O)⋯(H) $\text{HIO}_3$                       | HB | 1.82 | 0.0295 | 0.1004 | -0.0005 |
|                                                                                     | $\text{HIO}_3$ (I)⋯(O) $\text{HNO}_3$                       | XB | 2.86 | 0.0212 | 0.0667 | 0.0012  |

|                                                                                                                                                                                           |                                                                                  |    |      |        |        |         |
|-------------------------------------------------------------------------------------------------------------------------------------------------------------------------------------------|----------------------------------------------------------------------------------|----|------|--------|--------|---------|
| 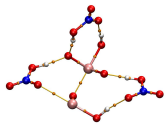<br>(HNO <sub>3</sub> ) <sub>3</sub> (HIO <sub>3</sub> ) <sub>1</sub> (HIO <sub>2</sub> ) <sub>1</sub>   | HIO <sub>2</sub> (O)⋯(I) HIO <sub>3</sub>                                        | XB | 2.22 | 0.0823 | 0.1548 | -0.0238 |
|                                                                                                                                                                                           | HNO <sub>3</sub> (H)⋯(O) HIO <sub>3</sub>                                        | HB | 1.61 | 0.0558 | 0.1090 | -0.0158 |
|                                                                                                                                                                                           | HNO <sub>3</sub> (H)⋯(O) HIO <sub>3</sub>                                        | HB | 1.61 | 0.0526 | 0.1155 | -0.0136 |
|                                                                                                                                                                                           | HIO <sub>3</sub> (O)⋯(H) HNO <sub>3</sub>                                        | HB | 1.67 | 0.0477 | 0.1071 | -0.0107 |
|                                                                                                                                                                                           | HIO <sub>2</sub> (H)⋯(O) HNO <sub>3</sub>                                        | HB | 1.79 | 0.0328 | 0.1028 | -0.0022 |
|                                                                                                                                                                                           | HIO <sub>3</sub> (H)⋯(O) HNO <sub>3</sub>                                        | HB | 1.88 | 0.0258 | 0.0922 | 0.0008  |
|                                                                                                                                                                                           | HIO <sub>2</sub> (I)⋯(O) HNO <sub>3</sub>                                        | XB | 2.70 | 0.0253 | 0.0865 | 0.0014  |
|                                                                                                                                                                                           | HIO <sub>2</sub> (O)⋯(I) HIO <sub>3</sub>                                        | XB | 2.27 | 0.0725 | 0.1494 | -0.0167 |
|                                                                                                                                                                                           | HIO <sub>2</sub> (I)⋯(O) NO <sub>3</sub> <sup>-</sup>                            | XB | 2.43 | 0.0523 | 0.1244 | -0.0072 |
|                                                                                                                                                                                           | HIO <sub>2</sub> (O)⋯(H) HNO <sub>3</sub>                                        | HB | 1.65 | 0.0512 | 0.1087 | -0.0127 |
| <br>(HNO <sub>3</sub> ) <sub>3</sub> (HIO <sub>3</sub> ) <sub>1</sub> (HIO <sub>2</sub> ) <sub>2</sub>   | HIO <sub>3</sub> (O)⋯(H) HNO <sub>3</sub>                                        | HB | 1.65 | 0.0503 | 0.1106 | -0.0118 |
|                                                                                                                                                                                           | HIO <sub>3</sub> (O)⋯(I) H <sub>2</sub> IO <sub>2</sub> <sup>+</sup>             | XB | 2.41 | 0.0493 | 0.1439 | -0.0041 |
|                                                                                                                                                                                           | NO <sub>3</sub> <sup>-</sup> (O)⋯(H) H <sub>2</sub> IO <sub>2</sub> <sup>+</sup> | HB | 1.80 | 0.0358 | 0.1066 | -0.0026 |
|                                                                                                                                                                                           | NO <sub>3</sub> <sup>-</sup> (O)⋯(H) H <sub>2</sub> IO <sub>2</sub> <sup>+</sup> | HB | 1.96 | 0.0223 | 0.0833 | 0.0019  |
|                                                                                                                                                                                           | HIO <sub>2</sub> (I)⋯(O) NO <sub>3</sub> <sup>-</sup>                            | XB | 2.93 | 0.0194 | 0.0647 | 0.0006  |
|                                                                                                                                                                                           | HIO <sub>3</sub> (I)⋯(O) HNO <sub>3</sub>                                        | XB | 2.97 | 0.0163 | 0.0528 | 0.0014  |
|                                                                                                                                                                                           | HIO <sub>2</sub> (H)⋯(O) HIO <sub>3</sub>                                        | HB | 2.23 | 0.0148 | 0.0533 | 0.0014  |
|                                                                                                                                                                                           | HIO <sub>3</sub> (O)⋯(I) HIO <sub>3</sub>                                        | XB | 2.32 | 0.0665 | 0.1371 | -0.0144 |
|                                                                                                                                                                                           | HIO <sub>3</sub> (I)⋯(O) HIO <sub>3</sub>                                        | XB | 2.32 | 0.0658 | 0.1387 | -0.0141 |
|                                                                                                                                                                                           | HIO <sub>3</sub> (O)⋯(H) HNO <sub>3</sub>                                        | HB | 1.64 | 0.0508 | 0.1101 | -0.0126 |
| <br>(HNO <sub>3</sub> ) <sub>3</sub> (HIO <sub>3</sub> ) <sub>2</sub>                                  | HNO <sub>3</sub> (H)⋯(O) HIO <sub>3</sub>                                        | HB | 1.64 | 0.0507 | 0.1104 | -0.0125 |
|                                                                                                                                                                                           | HIO <sub>3</sub> (O)⋯(H) HNO <sub>3</sub>                                        | HB | 1.71 | 0.0412 | 0.1072 | -0.0068 |
|                                                                                                                                                                                           | HIO <sub>3</sub> (H)⋯(O) HNO <sub>3</sub>                                        | HB | 1.82 | 0.0313 | 0.1025 | -0.0011 |
|                                                                                                                                                                                           | HNO <sub>3</sub> (O)⋯(I) HIO <sub>3</sub>                                        | XB | 2.81 | 0.0223 | 0.0733 | 0.0015  |
|                                                                                                                                                                                           | HIO <sub>3</sub> (I)⋯(O) HNO <sub>3</sub>                                        | XB | 2.97 | 0.0158 | 0.0527 | 0.0015  |
|                                                                                                                                                                                           | HIO <sub>2</sub> (O)⋯(I) HIO <sub>3</sub>                                        | XB | 2.19 | 0.0877 | 0.1603 | -0.0277 |
|                                                                                                                                                                                           | HIO <sub>3</sub> (I)⋯(O) HIO <sub>3</sub>                                        | XB | 2.34 | 0.0596 | 0.1503 | -0.0087 |
|                                                                                                                                                                                           | HNO <sub>3</sub> (H)⋯(O) HIO <sub>3</sub>                                        | HB | 1.65 | 0.0503 | 0.1094 | -0.0120 |
|                                                                                                                                                                                           | HNO <sub>3</sub> (H)⋯(O) HIO <sub>3</sub>                                        | HB | 1.66 | 0.0499 | 0.1094 | -0.0116 |
|                                                                                                                                                                                           | HIO <sub>3</sub> (O)⋯(H) HNO <sub>3</sub>                                        | HB | 1.68 | 0.0481 | 0.1072 | -0.0105 |
| <br>(HNO <sub>3</sub> ) <sub>3</sub> (HIO <sub>3</sub> ) <sub>2</sub> (HIO <sub>2</sub> ) <sub>1</sub> | HIO <sub>2</sub> (I)⋯(O) HIO <sub>3</sub>                                        | XB | 2.52 | 0.0406 | 0.1138 | -0.0024 |
|                                                                                                                                                                                           | HNO <sub>3</sub> (O)⋯(H) HIO <sub>3</sub>                                        | HB | 1.90 | 0.0249 | 0.0902 | 0.0011  |
|                                                                                                                                                                                           | HNO <sub>3</sub> (O)⋯(H) HIO <sub>3</sub>                                        | HB | 2.02 | 0.0184 | 0.0720 | 0.0024  |
|                                                                                                                                                                                           | HIO <sub>3</sub> (O)⋯(I) HIO <sub>3</sub>                                        | XB | 2.32 | 0.0653 | 0.1460 | -0.0129 |
|                                                                                                                                                                                           | HIO <sub>3</sub> (I)⋯(O) HIO <sub>3</sub>                                        | XB | 2.30 | 0.0648 | 0.1575 | -0.0114 |
|                                                                                                                                                                                           | HIO <sub>3</sub> (O)⋯(H) HNO <sub>3</sub>                                        | HB | 1.62 | 0.0546 | 0.1109 | -0.0145 |
|                                                                                                                                                                                           | HIO <sub>3</sub> (O)⋯(H) HNO <sub>3</sub>                                        | HB | 1.68 | 0.0478 | 0.1060 | -0.0105 |
|                                                                                                                                                                                           | HIO <sub>3</sub> (O)⋯(H) HNO <sub>3</sub>                                        | HB | 1.66 | 0.0471 | 0.1114 | -0.0104 |
|                                                                                                                                                                                           | HIO <sub>3</sub> (I)⋯(O) HIO <sub>3</sub>                                        | XB | 2.49 | 0.0437 | 0.1213 | -0.0025 |
|                                                                                                                                                                                           | HNO <sub>3</sub> (O)⋯(H) HIO <sub>3</sub>                                        | HB | 1.79 | 0.0341 | 0.1061 | -0.0021 |
| <br>(HNO <sub>3</sub> ) <sub>3</sub> (HIO <sub>3</sub> ) <sub>3</sub>                                  | HNO <sub>3</sub> (O)⋯(H) HIO <sub>3</sub>                                        | HB | 1.91 | 0.0244 | 0.0884 | 0.0012  |
|                                                                                                                                                                                           | HIO <sub>3</sub> (I)⋯(O) HNO <sub>3</sub>                                        | XB | 2.83 | 0.0224 | 0.0690 | 0.0010  |

Table S3. Comparison of binding free energies ( $\Delta G$ , kcal mol<sup>-1</sup>) for HNO<sub>3</sub>-HIO<sub>3</sub>-HIO<sub>2</sub> clusters and the corresponding H<sub>2</sub>SO<sub>4</sub>-HNO<sub>3</sub>-NH<sub>3</sub> clusters at 228 K.

| Clusters                                                                                           | $\Delta G_{228}$ | Clusters                                                                                                        | $\Delta G_{228}$ |
|----------------------------------------------------------------------------------------------------|------------------|-----------------------------------------------------------------------------------------------------------------|------------------|
| (HNO <sub>3</sub> ) <sub>1</sub> (HIO <sub>2</sub> ) <sub>1</sub>                                  | -14.4            | (HNO <sub>3</sub> ) <sub>1</sub> (NH <sub>3</sub> ) <sub>1</sub>                                                | -5.7             |
| (HNO <sub>3</sub> ) <sub>1</sub> (HIO <sub>3</sub> ) <sub>1</sub> (HIO <sub>2</sub> ) <sub>1</sub> | -27.4            | (HNO <sub>3</sub> ) <sub>1</sub> (H <sub>2</sub> SO <sub>4</sub> ) <sub>1</sub> (NH <sub>3</sub> ) <sub>1</sub> | -14.9            |
| (HNO <sub>3</sub> ) <sub>1</sub> (HIO <sub>3</sub> ) <sub>1</sub> (HIO <sub>2</sub> ) <sub>2</sub> | -51.7            | (HNO <sub>3</sub> ) <sub>1</sub> (H <sub>2</sub> SO <sub>4</sub> ) <sub>1</sub> (NH <sub>3</sub> ) <sub>2</sub> | -25.8            |
| (HNO <sub>3</sub> ) <sub>1</sub> (HIO <sub>3</sub> ) <sub>2</sub> (HIO <sub>2</sub> ) <sub>1</sub> | -45.3            | (HNO <sub>3</sub> ) <sub>1</sub> (H <sub>2</sub> SO <sub>4</sub> ) <sub>2</sub> (NH <sub>3</sub> ) <sub>1</sub> | -31.5            |
| (HNO <sub>3</sub> ) <sub>1</sub> (HIO <sub>3</sub> ) <sub>2</sub> (HIO <sub>2</sub> ) <sub>2</sub> | -65.9            | (HNO <sub>3</sub> ) <sub>1</sub> (H <sub>2</sub> SO <sub>4</sub> ) <sub>2</sub> (NH <sub>3</sub> ) <sub>2</sub> | -41.8            |
| (HNO <sub>3</sub> ) <sub>1</sub> (HIO <sub>3</sub> ) <sub>2</sub> (HIO <sub>2</sub> ) <sub>3</sub> | -96.6            | (HNO <sub>3</sub> ) <sub>1</sub> (H <sub>2</sub> SO <sub>4</sub> ) <sub>2</sub> (NH <sub>3</sub> ) <sub>3</sub> | -58.2            |
| (HNO <sub>3</sub> ) <sub>1</sub> (HIO <sub>3</sub> ) <sub>3</sub> (HIO <sub>2</sub> ) <sub>1</sub> | -61.3            | (HNO <sub>3</sub> ) <sub>1</sub> (H <sub>2</sub> SO <sub>4</sub> ) <sub>3</sub> (NH <sub>3</sub> ) <sub>1</sub> | -43.3            |
| (HNO <sub>3</sub> ) <sub>1</sub> (HIO <sub>3</sub> ) <sub>3</sub> (HIO <sub>2</sub> ) <sub>2</sub> | -88.5            | (HNO <sub>3</sub> ) <sub>1</sub> (H <sub>2</sub> SO <sub>4</sub> ) <sub>3</sub> (NH <sub>3</sub> ) <sub>2</sub> | -63.7            |
| (HNO <sub>3</sub> ) <sub>2</sub> (HIO <sub>2</sub> ) <sub>1</sub>                                  | -17.4            | (HNO <sub>3</sub> ) <sub>2</sub> (NH <sub>3</sub> ) <sub>1</sub>                                                | -7.9             |
| (HNO <sub>3</sub> ) <sub>2</sub> (HIO <sub>2</sub> ) <sub>2</sub>                                  | -44.4            | (HNO <sub>3</sub> ) <sub>2</sub> (NH <sub>3</sub> ) <sub>2</sub>                                                | -14.8            |
| (HNO <sub>3</sub> ) <sub>2</sub> (HIO <sub>3</sub> ) <sub>1</sub> (HIO <sub>2</sub> ) <sub>1</sub> | -33.9            | (HNO <sub>3</sub> ) <sub>2</sub> (H <sub>2</sub> SO <sub>4</sub> ) <sub>1</sub> (NH <sub>3</sub> ) <sub>1</sub> | -22.7            |
| (HNO <sub>3</sub> ) <sub>2</sub> (HIO <sub>3</sub> ) <sub>1</sub> (HIO <sub>2</sub> ) <sub>2</sub> | -57.9            | (HNO <sub>3</sub> ) <sub>2</sub> (H <sub>2</sub> SO <sub>4</sub> ) <sub>1</sub> (NH <sub>3</sub> ) <sub>2</sub> | -32.0            |
| (HNO <sub>3</sub> ) <sub>2</sub> (HIO <sub>3</sub> ) <sub>1</sub> (HIO <sub>2</sub> ) <sub>3</sub> | -85.1            | (HNO <sub>3</sub> ) <sub>2</sub> (H <sub>2</sub> SO <sub>4</sub> ) <sub>1</sub> (NH <sub>3</sub> ) <sub>3</sub> | -46.6            |
| (HNO <sub>3</sub> ) <sub>2</sub> (HIO <sub>3</sub> ) <sub>2</sub> (HIO <sub>2</sub> ) <sub>1</sub> | -52.5            | (HNO <sub>3</sub> ) <sub>2</sub> (H <sub>2</sub> SO <sub>4</sub> ) <sub>2</sub> (NH <sub>3</sub> ) <sub>1</sub> | -36.5            |
| (HNO <sub>3</sub> ) <sub>2</sub> (HIO <sub>3</sub> ) <sub>2</sub> (HIO <sub>2</sub> ) <sub>2</sub> | -69.7            | (HNO <sub>3</sub> ) <sub>2</sub> (H <sub>2</sub> SO <sub>4</sub> ) <sub>2</sub> (NH <sub>3</sub> ) <sub>2</sub> | -54.5            |
| (HNO <sub>3</sub> ) <sub>3</sub> (HIO <sub>2</sub> ) <sub>1</sub>                                  | -19.0            | (HNO <sub>3</sub> ) <sub>3</sub> (NH <sub>3</sub> ) <sub>1</sub>                                                | -11.9            |
| (HNO <sub>3</sub> ) <sub>3</sub> (HIO <sub>2</sub> ) <sub>2</sub>                                  | -43.3            | (HNO <sub>3</sub> ) <sub>3</sub> (NH <sub>3</sub> ) <sub>2</sub>                                                | -22.5            |
| (HNO <sub>3</sub> ) <sub>3</sub> (HIO <sub>2</sub> ) <sub>3</sub>                                  | -66.9            | (HNO <sub>3</sub> ) <sub>3</sub> (NH <sub>3</sub> ) <sub>3</sub>                                                | -30.1            |
| (HNO <sub>3</sub> ) <sub>3</sub> (HIO <sub>3</sub> ) <sub>1</sub> (HIO <sub>2</sub> ) <sub>1</sub> | -38.2            | (HNO <sub>3</sub> ) <sub>3</sub> (H <sub>2</sub> SO <sub>4</sub> ) <sub>1</sub> (NH <sub>3</sub> ) <sub>1</sub> | -28.1            |
| (HNO <sub>3</sub> ) <sub>3</sub> (HIO <sub>3</sub> ) <sub>1</sub> (HIO <sub>2</sub> ) <sub>2</sub> | -62.8            | (HNO <sub>3</sub> ) <sub>3</sub> (H <sub>2</sub> SO <sub>4</sub> ) <sub>1</sub> (NH <sub>3</sub> ) <sub>2</sub> | -39.7            |

Table S4. Comparison of evaporation rate sums ( $\Sigma\gamma$ ,  $s^{-1}$ ) for HNO<sub>3</sub>-HIO<sub>3</sub>-HIO<sub>2</sub> clusters and the corresponding H<sub>2</sub>SO<sub>4</sub>-HNO<sub>3</sub>-NH<sub>3</sub> clusters at 228 K.

| Clusters                                                                                           | $\Sigma\gamma$ ( $s^{-1}$ ) | Clusters                                                                                                        | $\Sigma\gamma$ ( $s^{-1}$ ) |
|----------------------------------------------------------------------------------------------------|-----------------------------|-----------------------------------------------------------------------------------------------------------------|-----------------------------|
| (HNO <sub>3</sub> ) <sub>1</sub> (HIO <sub>2</sub> ) <sub>1</sub>                                  | $7.97 \times 10^{-4}$       | (HNO <sub>3</sub> ) <sub>1</sub> (NH <sub>3</sub> ) <sub>1</sub>                                                | $4.28 \times 10^4$          |
| (HNO <sub>3</sub> ) <sub>1</sub> (HIO <sub>3</sub> ) <sub>1</sub> (HIO <sub>2</sub> ) <sub>1</sub> | $7.00 \times 10^3$          | (HNO <sub>3</sub> ) <sub>1</sub> (H <sub>2</sub> SO <sub>4</sub> ) <sub>1</sub> (NH <sub>3</sub> ) <sub>1</sub> | $1.30 \times 10^4$          |
| (HNO <sub>3</sub> ) <sub>1</sub> (HIO <sub>3</sub> ) <sub>1</sub> (HIO <sub>2</sub> ) <sub>2</sub> | $1.74 \times 10^1$          | (HNO <sub>3</sub> ) <sub>1</sub> (H <sub>2</sub> SO <sub>4</sub> ) <sub>1</sub> (NH <sub>3</sub> ) <sub>2</sub> | $6.25 \times 10^{-1}$       |
| (HNO <sub>3</sub> ) <sub>1</sub> (HIO <sub>3</sub> ) <sub>2</sub> (HIO <sub>2</sub> ) <sub>1</sub> | $1.62 \times 10^4$          | (HNO <sub>3</sub> ) <sub>1</sub> (H <sub>2</sub> SO <sub>4</sub> ) <sub>2</sub> (NH <sub>3</sub> ) <sub>1</sub> | $1.65 \times 10^5$          |
| (HNO <sub>3</sub> ) <sub>1</sub> (HIO <sub>3</sub> ) <sub>2</sub> (HIO <sub>2</sub> ) <sub>2</sub> | $1.59 \times 10^4$          | (HNO <sub>3</sub> ) <sub>1</sub> (H <sub>2</sub> SO <sub>4</sub> ) <sub>2</sub> (NH <sub>3</sub> ) <sub>2</sub> | $1.77 \times 10^4$          |
| (HNO <sub>3</sub> ) <sub>1</sub> (HIO <sub>3</sub> ) <sub>2</sub> (HIO <sub>2</sub> ) <sub>3</sub> | $4.83 \times 10^{-5}$       | (HNO <sub>3</sub> ) <sub>1</sub> (H <sub>2</sub> SO <sub>4</sub> ) <sub>2</sub> (NH <sub>3</sub> ) <sub>3</sub> | $5.08 \times 10^{-6}$       |
| (HNO <sub>3</sub> ) <sub>1</sub> (HIO <sub>3</sub> ) <sub>3</sub> (HIO <sub>2</sub> ) <sub>1</sub> | $2.39 \times 10^3$          | (HNO <sub>3</sub> ) <sub>1</sub> (H <sub>2</sub> SO <sub>4</sub> ) <sub>3</sub> (NH <sub>3</sub> ) <sub>1</sub> | $3.22 \times 10^5$          |
| (HNO <sub>3</sub> ) <sub>1</sub> (HIO <sub>3</sub> ) <sub>3</sub> (HIO <sub>2</sub> ) <sub>2</sub> | $3.87 \times 10^2$          | (HNO <sub>3</sub> ) <sub>1</sub> (H <sub>2</sub> SO <sub>4</sub> ) <sub>3</sub> (NH <sub>3</sub> ) <sub>2</sub> | $2.83 \times 10^0$          |
| (HNO <sub>3</sub> ) <sub>2</sub> (HIO <sub>2</sub> ) <sub>1</sub>                                  | $5.92 \times 10^7$          | (HNO <sub>3</sub> ) <sub>2</sub> (NH <sub>3</sub> ) <sub>1</sub>                                                | $8.33 \times 10^7$          |
| (HNO <sub>3</sub> ) <sub>2</sub> (HIO <sub>2</sub> ) <sub>2</sub>                                  | $2.30 \times 10^{-4}$       | (HNO <sub>3</sub> ) <sub>2</sub> (NH <sub>3</sub> ) <sub>2</sub>                                                | $2.77 \times 10^6$          |
| (HNO <sub>3</sub> ) <sub>2</sub> (HIO <sub>3</sub> ) <sub>1</sub> (HIO <sub>2</sub> ) <sub>1</sub> | $3.83 \times 10^4$          | (HNO <sub>3</sub> ) <sub>2</sub> (H <sub>2</sub> SO <sub>4</sub> ) <sub>1</sub> (NH <sub>3</sub> ) <sub>1</sub> | $3.47 \times 10^2$          |
| (HNO <sub>3</sub> ) <sub>2</sub> (HIO <sub>3</sub> ) <sub>1</sub> (HIO <sub>2</sub> ) <sub>2</sub> | $5.63 \times 10^4$          | (HNO <sub>3</sub> ) <sub>2</sub> (H <sub>2</sub> SO <sub>4</sub> ) <sub>1</sub> (NH <sub>3</sub> ) <sub>2</sub> | $1.58 \times 10^4$          |
| (HNO <sub>3</sub> ) <sub>2</sub> (HIO <sub>3</sub> ) <sub>1</sub> (HIO <sub>2</sub> ) <sub>3</sub> | $1.61 \times 10^{-4}$       | (HNO <sub>3</sub> ) <sub>2</sub> (H <sub>2</sub> SO <sub>4</sub> ) <sub>1</sub> (NH <sub>3</sub> ) <sub>3</sub> | $2.40 \times 10^{-4}$       |
| (HNO <sub>3</sub> ) <sub>2</sub> (HIO <sub>3</sub> ) <sub>2</sub> (HIO <sub>2</sub> ) <sub>1</sub> | $1.33 \times 10^4$          | (HNO <sub>3</sub> ) <sub>2</sub> (H <sub>2</sub> SO <sub>4</sub> ) <sub>2</sub> (NH <sub>3</sub> ) <sub>1</sub> | $1.91 \times 10^5$          |
| (HNO <sub>3</sub> ) <sub>2</sub> (HIO <sub>3</sub> ) <sub>2</sub> (HIO <sub>2</sub> ) <sub>2</sub> | $1.61 \times 10^7$          | (HNO <sub>3</sub> ) <sub>2</sub> (H <sub>2</sub> SO <sub>4</sub> ) <sub>2</sub> (NH <sub>3</sub> ) <sub>2</sub> | $9.05 \times 10^{-3}$       |
| (HNO <sub>3</sub> ) <sub>3</sub> (HIO <sub>2</sub> ) <sub>1</sub>                                  | $1.77 \times 10^9$          | (HNO <sub>3</sub> ) <sub>3</sub> (NH <sub>3</sub> ) <sub>1</sub>                                                | $1.78 \times 10^6$          |
| (HNO <sub>3</sub> ) <sub>3</sub> (HIO <sub>2</sub> ) <sub>2</sub>                                  | $5.68 \times 10^{11}$       | (HNO <sub>3</sub> ) <sub>3</sub> (NH <sub>3</sub> ) <sub>2</sub>                                                | $5.48 \times 10^2$          |
| (HNO <sub>3</sub> ) <sub>3</sub> (HIO <sub>2</sub> ) <sub>3</sub>                                  | $9.21 \times 10^4$          | (HNO <sub>3</sub> ) <sub>3</sub> (NH <sub>3</sub> ) <sub>3</sub>                                                | $1.01 \times 10^3$          |
| (HNO <sub>3</sub> ) <sub>3</sub> (HIO <sub>3</sub> ) <sub>1</sub> (HIO <sub>2</sub> ) <sub>1</sub> | $3.32 \times 10^6$          | (HNO <sub>3</sub> ) <sub>3</sub> (H <sub>2</sub> SO <sub>4</sub> ) <sub>1</sub> (NH <sub>3</sub> ) <sub>1</sub> | $8.40 \times 10^4$          |
| (HNO <sub>3</sub> ) <sub>3</sub> (HIO <sub>3</sub> ) <sub>1</sub> (HIO <sub>2</sub> ) <sub>2</sub> | $1.35 \times 10^6$          | (HNO <sub>3</sub> ) <sub>3</sub> (H <sub>2</sub> SO <sub>4</sub> ) <sub>1</sub> (NH <sub>3</sub> ) <sub>2</sub> | $4.70 \times 10^2$          |

Table S5. Cartesian coordinates of  $(\text{HNO}_3)_x(\text{HIO}_3)_y(\text{HIO}_2)_z$  clusters ( $2 \leq x + y + z \leq 6$ ,  $1 \leq x \leq 3$ ) in the present study calculated at the  $\omega\text{B97X-D/6-311++G(3df, 3pd)}$  (for H, N, and O atoms) and aug-cc-pVTZ-PP with ECP28MDF (for I atom) levels of theory.

| $(\text{HNO}_3)_1(\text{HIO}_2)_1$ | X         | Y         | Z         |
|------------------------------------|-----------|-----------|-----------|
| O                                  | 0.430565  | 1.463463  | 0.686532  |
| I                                  | 0.787082  | -0.291332 | -0.015048 |
| O                                  | 2.635613  | 0.243640  | -0.436589 |
| H                                  | 3.165780  | 0.301811  | 0.362746  |
| H                                  | -0.396934 | 1.724221  | 0.233685  |
| N                                  | -2.267582 | 0.014152  | -0.079652 |
| O                                  | -3.390296 | -0.394462 | -0.039701 |
| O                                  | -1.918406 | 1.072684  | -0.607341 |
| O                                  | -1.333863 | -0.720889 | 0.491930  |
| $(\text{HNO}_3)_1(\text{HIO}_2)_2$ | X         | Y         | Z         |
| I                                  | -1.822661 | -0.470866 | -0.258089 |
| O                                  | -1.150974 | -0.134475 | 1.505491  |
| O                                  | -3.634537 | 0.146428  | 0.246900  |
| H                                  | -4.077767 | -0.506937 | 0.794137  |
| I                                  | 1.810791  | -0.447402 | -0.036907 |
| O                                  | 0.207530  | -1.124829 | -0.748199 |
| O                                  | 2.461160  | -2.225289 | 0.521509  |
| H                                  | 2.063051  | -2.465776 | 1.362480  |
| H                                  | -0.700719 | 0.744251  | 1.450594  |
| N                                  | 0.644079  | 2.533070  | 0.010189  |
| O                                  | 0.113807  | 2.167480  | 1.073111  |
| O                                  | 1.123630  | 1.631805  | -0.792244 |
| O                                  | 0.733885  | 3.684526  | -0.312038 |
| $(\text{HNO}_3)_1(\text{HIO}_2)_3$ | X         | Y         | Z         |
| H                                  | 0.979335  | -0.772235 | 1.482792  |
| I                                  | -2.166914 | -0.943320 | -0.088293 |
| O                                  | -1.666417 | 0.552975  | 0.909124  |
| O                                  | -3.713408 | -0.107396 | -0.982256 |
| H                                  | -3.422911 | 0.322526  | -1.790709 |
| I                                  | -0.383850 | 2.276575  | 0.259485  |
| O                                  | 0.506729  | 1.092304  | -0.897093 |
| O                                  | 0.837868  | 3.795228  | -0.137656 |
| H                                  | 0.651497  | 4.150077  | -1.010233 |
| I                                  | 2.263669  | -0.206021 | -0.418091 |

|   |           |           |           |
|---|-----------|-----------|-----------|
| O | 1.669326  | -0.075246 | 1.398367  |
| O | 3.682716  | -1.468788 | 0.066219  |
| H | 3.261362  | -2.325619 | 0.214198  |
| N | 0.116749  | -2.986408 | 0.348034  |
| O | -0.239552 | -1.920911 | 1.003445  |
| O | 1.278028  | -3.345111 | 0.423196  |
| O | -0.739101 | -3.549716 | -0.314172 |

| (HNO <sub>3</sub> ) <sub>1</sub> (HIO <sub>2</sub> ) <sub>4</sub> | X         | Y         | Z         |
|-------------------------------------------------------------------|-----------|-----------|-----------|
| H                                                                 | -1.428569 | 1.949293  | 2.077297  |
| I                                                                 | 2.535812  | -1.041280 | 0.965910  |
| O                                                                 | 2.329711  | -0.740676 | -0.871255 |
| O                                                                 | 1.178177  | 0.024423  | 1.705353  |
| H                                                                 | 1.281125  | 1.623587  | 1.313082  |
| I                                                                 | -1.317100 | -0.396259 | 1.619295  |
| O                                                                 | -1.327206 | 1.214153  | 2.702694  |
| O                                                                 | -3.250943 | -0.527111 | 1.568017  |
| H                                                                 | -3.544668 | 0.156027  | 0.942981  |
| I                                                                 | 0.731885  | 2.296150  | -0.917228 |
| O                                                                 | 1.298771  | 2.528302  | 0.891545  |
| O                                                                 | 2.479147  | 1.860236  | -1.620363 |
| H                                                                 | 2.593762  | 0.894869  | -1.453281 |
| I                                                                 | -0.986412 | -2.057853 | -1.658891 |
| O                                                                 | -1.225480 | -2.369031 | 0.150348  |
| O                                                                 | 0.845910  | -2.521732 | -1.944976 |
| H                                                                 | 1.437742  | -1.787701 | -1.564300 |
| N                                                                 | -2.285048 | 2.088740  | -0.741843 |
| O                                                                 | -1.948831 | 2.104368  | -1.922720 |
| O                                                                 | -3.335496 | 1.597613  | -0.353668 |
| O                                                                 | -1.474492 | 2.592276  | 0.119465  |

| (HNO <sub>3</sub> ) <sub>1</sub> (HIO <sub>2</sub> ) <sub>5</sub> | X         | Y         | Z         |
|-------------------------------------------------------------------|-----------|-----------|-----------|
| N                                                                 | -2.022976 | 2.781292  | -0.247648 |
| O                                                                 | -1.431846 | 2.890349  | 0.853086  |
| H                                                                 | -1.752665 | 2.279455  | 2.824230  |
| O                                                                 | -2.864969 | 1.850325  | -0.399981 |
| O                                                                 | -1.763076 | 3.521198  | -1.174910 |
| I                                                                 | -0.152234 | 0.847334  | -2.184586 |
| O                                                                 | -0.084514 | -1.012172 | -1.832901 |
| O                                                                 | -1.938167 | 0.761098  | -3.013700 |
| H                                                                 | -2.548500 | 1.145522  | -2.365925 |
| I                                                                 | -1.291492 | 0.000073  | 2.229495  |
| O                                                                 | -1.760356 | 1.494444  | 3.392412  |
| O                                                                 | -3.015201 | -0.027025 | 1.402563  |

|   |           |           |           |
|---|-----------|-----------|-----------|
| H | -3.010978 | 0.729463  | 0.743353  |
| I | 2.135328  | 1.750099  | 0.508245  |
| O | 1.938164  | 1.061441  | -1.224303 |
| O | 1.304877  | 3.488680  | 0.201168  |
| H | 0.349255  | 3.431634  | 0.390700  |
| I | 2.846202  | -1.884137 | 0.032727  |
| O | 3.229757  | -0.340358 | 0.971684  |
| O | 1.574371  | -2.773225 | 1.165081  |
| H | 0.664479  | -2.416988 | 0.972531  |
| I | -1.756347 | -2.050317 | -0.806754 |
| O | -0.815110 | -1.732798 | 0.808504  |
| O | -3.151342 | -3.094319 | 0.136966  |
| H | -3.738714 | -2.481084 | 0.589614  |

| $(\text{HNO}_3)_1(\text{HIO}_3)_1$ | X         | Y         | Z         |
|------------------------------------|-----------|-----------|-----------|
| I                                  | -1.389839 | -0.077570 | -0.087919 |
| O                                  | -0.526817 | 1.449337  | -0.852732 |
| H                                  | 0.413899  | 1.421772  | -0.582378 |
| O                                  | -1.370848 | 0.245701  | 1.648874  |
| O                                  | -0.161574 | -1.342818 | -0.403486 |
| N                                  | 2.871843  | 0.093884  | 0.082144  |
| O                                  | 2.444631  | -1.160264 | -0.120647 |
| H                                  | 1.447746  | -1.136542 | -0.184306 |
| O                                  | 2.031180  | 0.977799  | 0.131304  |
| O                                  | 4.045545  | 0.226343  | 0.203112  |

| $(\text{HNO}_3)_1(\text{HIO}_3)_1(\text{HIO}_2)_1$ | X         | Y         | Z         |
|----------------------------------------------------|-----------|-----------|-----------|
| I                                                  | 1.731370  | 0.420553  | 0.247837  |
| O                                                  | 0.749387  | 1.467663  | -0.843102 |
| O                                                  | 1.825937  | -1.149740 | -0.605364 |
| O                                                  | 3.447336  | 1.103332  | -0.364708 |
| H                                                  | 3.497848  | 1.078698  | -1.326513 |
| I                                                  | -1.213164 | -1.353959 | -0.087321 |
| O                                                  | -0.235167 | -0.300111 | 1.100664  |
| O                                                  | -0.223297 | -2.997348 | 0.129239  |
| H                                                  | 0.657755  | -2.786156 | -0.228186 |
| H                                                  | -0.578716 | 2.076627  | -0.351294 |
| N                                                  | -2.489044 | 2.043526  | -0.060133 |
| O                                                  | -1.321466 | 2.664729  | 0.029616  |
| O                                                  | -2.511398 | 0.929455  | -0.577465 |
| O                                                  | -3.433644 | 2.631606  | 0.358565  |

| $(\text{HNO}_3)_1(\text{HIO}_3)_1(\text{HIO}_2)_2$ | X        | Y         | Z        |
|----------------------------------------------------|----------|-----------|----------|
| H                                                  | 1.380709 | -0.233226 | 1.598421 |

|   |           |           |           |
|---|-----------|-----------|-----------|
| I | -2.018095 | -1.078948 | 0.207136  |
| O | -0.505562 | -1.795566 | -0.514970 |
| O | -2.636185 | -0.028251 | -1.096824 |
| O | -3.115327 | -2.607188 | -0.312504 |
| H | -3.244831 | -2.617409 | -1.267005 |
| I | 1.803975  | -1.631181 | -0.243761 |
| O | 1.403294  | -1.208677 | 1.576937  |
| O | 3.714846  | -1.471431 | 0.002857  |
| H | 3.910375  | -0.516160 | -0.021329 |
| I | -0.560814 | 2.192815  | 0.029651  |
| O | -0.962384 | 0.647671  | 1.046488  |
| O | -2.419313 | 2.656499  | -0.308095 |
| H | -2.784921 | 1.915306  | -0.819967 |
| N | 2.542920  | 1.930862  | -0.092725 |
| O | 2.271203  | 2.967013  | -0.670897 |
| O | 3.615356  | 1.351149  | -0.199217 |
| O | 1.635290  | 1.407919  | 0.667299  |

| $(\text{HNO}_3)_1(\text{HIO}_3)_1(\text{HIO}_2)_3$ | X         | Y         | Z         |
|----------------------------------------------------|-----------|-----------|-----------|
| H                                                  | -2.015927 | 2.988790  | 0.355648  |
| I                                                  | 2.497560  | -0.557915 | 0.346596  |
| O                                                  | 1.918401  | 0.443172  | -1.045472 |
| O                                                  | 1.441430  | -0.033984 | 1.718108  |
| O                                                  | 3.929390  | 0.696695  | 0.784851  |
| H                                                  | 3.626055  | 1.608701  | 0.699230  |
| I                                                  | -0.372842 | -1.760528 | -1.396613 |
| O                                                  | 1.069834  | -2.075206 | -0.210377 |
| O                                                  | 0.795398  | -1.642728 | -2.971046 |
| H                                                  | 1.241463  | -0.788377 | -2.928024 |
| I                                                  | 0.095444  | 2.295796  | -0.417513 |
| O                                                  | -1.208488 | 3.530436  | 0.291941  |
| O                                                  | 1.376917  | 2.724850  | 0.988218  |
| H                                                  | 1.348483  | 1.972302  | 1.603911  |
| I                                                  | -1.858766 | -0.716583 | 1.767556  |
| O                                                  | -1.759129 | -2.000459 | 0.430802  |
| O                                                  | -0.538067 | -1.353057 | 3.010493  |
| H                                                  | 0.311843  | -0.994049 | 2.666332  |
| N                                                  | -2.598352 | 1.019111  | -1.369591 |
| O                                                  | -3.143981 | 0.120561  | -1.965789 |
| O                                                  | -2.865013 | 1.280438  | -0.171217 |
| O                                                  | -1.701379 | 1.716542  | -1.949424 |

| $(\text{HNO}_3)_1(\text{HIO}_3)_1(\text{HIO}_2)_4$ | X        | Y         | Z         |
|----------------------------------------------------|----------|-----------|-----------|
| H                                                  | 3.214318 | -1.689238 | -1.648287 |

|   |           |           |           |
|---|-----------|-----------|-----------|
| O | 2.656371  | -1.519278 | -2.429296 |
| I | 1.646588  | 2.072546  | -0.676137 |
| O | 3.555766  | 1.818720  | -0.946042 |
| H | 3.799160  | 1.017450  | -0.454565 |
| O | -1.570845 | -0.929888 | -1.272883 |
| I | -2.565426 | -1.476969 | 0.129810  |
| O | -2.196218 | -3.349031 | -0.210858 |
| H | -1.312196 | -3.448123 | -0.608279 |
| O | -1.529913 | -1.340120 | 1.591167  |
| O | -0.625684 | 1.455282  | 2.711475  |
| I | 0.467386  | -0.101267 | 2.486407  |
| O | 2.054954  | 0.805246  | 3.129098  |
| H | 2.733591  | 0.597447  | 2.458267  |
| O | -3.121997 | 0.672540  | 0.306675  |
| I | -2.357068 | 2.077423  | -0.686208 |
| O | -0.696529 | 2.350903  | 0.135810  |
| H | -0.697882 | 1.885023  | 1.828803  |
| O | 1.038014  | 1.021080  | -2.093586 |
| I | 0.859639  | -1.250657 | -1.780719 |
| O | 0.561835  | -3.191028 | -1.382548 |
| H | 1.158606  | -3.424997 | -0.660634 |
| N | 3.019239  | -1.531304 | 0.988270  |
| O | 3.409225  | -0.341448 | 0.978940  |
| O | 2.259936  | -1.923994 | 1.896570  |
| O | 3.362643  | -2.308417 | 0.096694  |

| $(\text{HNO}_3)_1(\text{HIO}_3)_2$ | X         | Y         | Z         |
|------------------------------------|-----------|-----------|-----------|
| I                                  | -1.848277 | 0.145043  | -0.287611 |
| O                                  | -1.405319 | 1.743304  | 0.386349  |
| O                                  | -1.218908 | -1.050698 | 0.926901  |
| O                                  | -3.648899 | 0.112313  | 0.419932  |
| H                                  | -3.643741 | 0.161093  | 1.382596  |
| I                                  | 1.118082  | -1.198515 | 0.209347  |
| O                                  | 2.873538  | -0.853101 | -0.516814 |
| O                                  | 0.250741  | -0.131698 | -1.030830 |
| O                                  | 0.967160  | -2.829847 | -0.426404 |
| N                                  | 1.880498  | 2.468278  | 0.166501  |
| O                                  | 0.741699  | 3.047546  | -0.193491 |
| O                                  | 2.878536  | 2.939639  | -0.282018 |
| O                                  | 1.815488  | 1.511403  | 0.928954  |
| H                                  | -0.022947 | 2.466296  | 0.117557  |
| H                                  | 3.171207  | 0.017809  | -0.218325 |

| $(\text{HNO}_3)_1(\text{HIO}_3)_2(\text{HIO}_2)_1$ | X | Y | Z |
|----------------------------------------------------|---|---|---|
|----------------------------------------------------|---|---|---|

|   |           |           |           |
|---|-----------|-----------|-----------|
| N | 3.817881  | -0.104040 | 1.674226  |
| O | 3.312860  | -1.328095 | 1.466786  |
| H | 2.787637  | -1.306828 | 0.611120  |
| O | 3.597481  | 0.745322  | 0.832657  |
| O | 4.441420  | 0.032286  | 2.679851  |
| I | 0.152873  | -1.618999 | -0.853661 |
| O | 1.935322  | -1.580396 | -0.709472 |
| O | -0.342428 | -0.907840 | 0.767115  |
| O | -0.051464 | -3.448687 | -0.201829 |
| H | 0.458269  | -3.600956 | 0.600673  |
| I | -2.395075 | 0.123123  | 0.847142  |
| O | -1.583529 | 1.670158  | 0.364049  |
| O | -2.710233 | -0.753753 | -0.672240 |
| O | -4.160333 | 0.906205  | 1.028217  |
| H | -4.497017 | 1.175961  | 0.165982  |
| I | 0.649497  | 1.879277  | -0.605290 |
| O | 0.147292  | 0.386234  | -1.630543 |
| O | 2.403923  | 2.103249  | -1.396084 |
| H | 3.016811  | 1.542388  | -0.899577 |

| $(\text{HNO}_3)_1(\text{HIO}_3)_2(\text{HIO}_2)_2$ | X         | Y         | Z         |
|----------------------------------------------------|-----------|-----------|-----------|
| H                                                  | -3.857594 | -1.370692 | 0.214044  |
| I                                                  | 0.151898  | 2.186925  | -0.357146 |
| O                                                  | -0.270178 | 1.586682  | 1.272782  |
| O                                                  | 1.951041  | 1.987632  | -0.341058 |
| O                                                  | 0.160270  | 4.067697  | 0.078009  |
| H                                                  | 0.572519  | 4.213678  | 0.937640  |
| I                                                  | 0.530101  | -1.674390 | -1.362841 |
| O                                                  | 0.522105  | -2.241409 | 0.337005  |
| O                                                  | -0.085273 | 0.040090  | -1.310080 |
| O                                                  | -1.198267 | -2.351144 | -1.879575 |
| H                                                  | -1.918284 | -1.692621 | -1.780991 |
| I                                                  | -2.123399 | -0.400923 | 1.471298  |
| O                                                  | -3.776685 | -1.346290 | 1.186646  |
| O                                                  | -1.258378 | -1.795169 | 2.497205  |
| H                                                  | -0.669704 | -2.231519 | 1.854321  |
| I                                                  | 2.902696  | -0.040956 | 0.648027  |
| O                                                  | 2.544428  | -0.841467 | -1.004845 |
| O                                                  | 3.674770  | -1.634785 | 1.472382  |
| H                                                  | 2.948585  | -2.232495 | 1.683738  |
| N                                                  | -2.989765 | 0.643532  | -1.399883 |
| O                                                  | -2.763754 | 1.273059  | -2.402973 |
| O                                                  | -2.912717 | 1.214396  | -0.260470 |
| O                                                  | -3.286843 | -0.576276 | -1.429334 |

| $(\text{HNO}_3)_1(\text{HIO}_3)_2(\text{HIO}_2)_3$ | X         | Y         | Z         |
|----------------------------------------------------|-----------|-----------|-----------|
| H                                                  | 0.680378  | 3.623919  | -0.744833 |
| O                                                  | 1.124909  | 3.278699  | -1.535188 |
| I                                                  | 0.533226  | 1.451904  | -1.677598 |
| O                                                  | -1.024432 | 1.911652  | -2.727729 |
| H                                                  | -1.725925 | 2.145785  | -2.102346 |
| O                                                  | 2.324576  | -0.632865 | 1.881932  |
| I                                                  | 0.637215  | 0.130000  | 2.215061  |
| O                                                  | 1.322389  | 1.728554  | 3.094337  |
| H                                                  | 1.186951  | 2.465834  | 2.486295  |
| O                                                  | 2.155205  | -1.668323 | -0.765107 |
| O                                                  | 2.585117  | 1.080387  | -0.310710 |
| I                                                  | 3.339113  | -0.539162 | -0.024916 |
| O                                                  | 4.491077  | -0.499303 | -1.612375 |
| H                                                  | 3.978271  | -0.539104 | -2.425738 |
| O                                                  | -0.348632 | -1.789425 | 1.135495  |
| I                                                  | -0.469564 | -2.392168 | -0.575250 |
| O                                                  | -2.142445 | -3.041542 | -0.552964 |
| H                                                  | -3.565546 | -2.273292 | 0.051873  |
| O                                                  | -0.719121 | -0.867463 | -1.556489 |
| O                                                  | -4.287892 | -1.624095 | 0.248868  |
| I                                                  | -3.455180 | 0.100891  | 0.234598  |
| O                                                  | -3.236696 | 0.194987  | -1.661766 |
| H                                                  | -2.364445 | -0.235121 | -1.832866 |
| N                                                  | -1.512062 | 2.477503  | 0.995971  |
| O                                                  | -1.820647 | 1.895367  | 2.038708  |
| O                                                  | -2.235675 | 2.299577  | -0.033694 |
| O                                                  | -0.512761 | 3.189021  | 0.917352  |

| $(\text{HNO}_3)_1(\text{HIO}_3)_3$ | X         | Y         | Z         |
|------------------------------------|-----------|-----------|-----------|
| N                                  | -3.524129 | 0.526733  | 1.376055  |
| O                                  | -3.623357 | 1.593044  | 0.574295  |
| H                                  | -2.693721 | 1.846501  | 0.306399  |
| O                                  | -2.403381 | 0.080449  | 1.567200  |
| O                                  | -4.543966 | 0.118536  | 1.830197  |
| I                                  | -1.157957 | -1.650311 | -0.365330 |
| O                                  | -0.752041 | -0.094444 | -1.236211 |
| O                                  | -0.748591 | -2.881885 | -1.559272 |
| O                                  | -3.054229 | -1.573477 | -0.745283 |
| H                                  | -3.195155 | -1.900043 | -1.642735 |
| I                                  | 0.245267  | 1.858864  | -0.628072 |
| O                                  | -1.328220 | 2.573705  | -0.188775 |
| O                                  | 0.727628  | 1.047314  | 0.939326  |

|   |          |           |           |
|---|----------|-----------|-----------|
| O | 1.253805 | 3.477848  | -0.285398 |
| H | 0.848588 | 3.964118  | 0.442356  |
| I | 2.424451 | -0.488997 | 0.686918  |
| O | 1.154775 | -1.756581 | 0.485768  |
| O | 2.593590 | 0.281104  | -0.917003 |
| O | 3.929852 | -1.694422 | 0.517756  |
| H | 3.938957 | -2.103703 | -0.355590 |

| $(\text{HNO}_3)_1(\text{HIO}_3)_3(\text{HIO}_2)_1$ | X         | Y         | Z         |
|----------------------------------------------------|-----------|-----------|-----------|
| N                                                  | -1.423636 | -2.698310 | -0.694533 |
| O                                                  | -2.307883 | -2.479478 | 0.192182  |
| H                                                  | -3.463335 | -1.350934 | -0.420432 |
| O                                                  | -1.527458 | -2.162108 | -1.798536 |
| O                                                  | -0.457094 | -3.406055 | -0.406340 |
| I                                                  | 0.128259  | -0.463731 | 2.063180  |
| O                                                  | -1.236722 | 0.610766  | 2.466912  |
| O                                                  | -0.081852 | -0.593434 | 0.257305  |
| O                                                  | -0.678259 | -2.132042 | 2.451476  |
| H                                                  | -1.303112 | -2.389014 | 1.726962  |
| I                                                  | 1.683429  | -1.469941 | -0.884957 |
| O                                                  | 2.155038  | 0.272005  | -1.211152 |
| O                                                  | 2.307344  | -1.757657 | 0.764366  |
| O                                                  | 3.229312  | -2.210844 | -1.777956 |
| H                                                  | 3.989353  | -2.173174 | -1.185363 |
| I                                                  | 1.431282  | 2.285476  | -0.342879 |
| O                                                  | -0.179373 | 2.136734  | -1.099706 |
| O                                                  | 1.322942  | 1.555752  | 1.309121  |
| O                                                  | 1.216336  | 4.098829  | 0.312989  |
| H                                                  | 0.492815  | 4.151181  | 0.948076  |
| I                                                  | -2.561593 | 0.754263  | -0.991891 |
| O                                                  | -3.935507 | -0.540428 | -0.754766 |
| O                                                  | -2.784900 | 1.700997  | 0.639112  |
| H                                                  | -2.198666 | 1.284253  | 1.329439  |

| $(\text{HNO}_3)_1(\text{HIO}_3)_3(\text{HIO}_2)_2$ | X         | Y         | Z         |
|----------------------------------------------------|-----------|-----------|-----------|
| H                                                  | -0.304658 | 2.536235  | -1.583672 |
| O                                                  | -0.605154 | 3.150571  | -0.892490 |
| I                                                  | 0.111726  | 2.442144  | 0.765931  |
| O                                                  | 1.795911  | 3.321583  | 0.554531  |
| H                                                  | 2.404723  | 2.662232  | 0.150868  |
| O                                                  | -0.721319 | -2.458554 | -0.897560 |
| I                                                  | -1.354768 | -2.366866 | 0.887264  |
| O                                                  | 0.148052  | -3.135860 | 1.792578  |
| H                                                  | 0.701670  | -2.392694 | 2.144869  |

|   |           |           |           |
|---|-----------|-----------|-----------|
| O | -1.388844 | 0.072022  | -1.763442 |
| O | 0.925230  | -0.503413 | -0.118346 |
| I | 0.228683  | -0.751422 | -1.772157 |
| O | 0.933853  | 0.969570  | -2.420401 |
| H | 1.827794  | 1.129888  | -2.060841 |
| O | -3.453228 | -1.146287 | -0.019128 |
| I | -3.321450 | 0.579697  | -0.498902 |
| O | -5.050634 | 1.132099  | 0.169311  |
| H | -5.106478 | 0.985627  | 1.121067  |
| O | -2.344257 | 1.320945  | 0.799521  |
| I | 3.334093  | -0.360117 | -0.098542 |
| O | 5.265206  | -0.428666 | -0.071673 |
| H | 5.611076  | -0.273724 | -0.958775 |
| O | 3.095277  | -1.282949 | -1.614504 |
| O | 3.163801  | 1.329753  | -0.700269 |
| N | 1.078709  | 0.020368  | 2.613568  |
| O | -0.125118 | 0.105722  | 2.826288  |
| O | 1.675130  | -1.074613 | 2.642897  |
| O | 1.736832  | 1.054045  | 2.320320  |

| (HNO <sub>3</sub> ) <sub>1</sub> (HIO <sub>3</sub> ) <sub>4</sub> | X         | Y         | Z         |
|-------------------------------------------------------------------|-----------|-----------|-----------|
| N                                                                 | 0.441001  | -2.985928 | -0.868172 |
| O                                                                 | 1.444110  | -3.190919 | -0.110081 |
| H                                                                 | 1.192887  | -2.566310 | 1.438299  |
| O                                                                 | -0.661742 | -3.403633 | -0.531871 |
| O                                                                 | 0.603411  | -2.327669 | -1.899484 |
| I                                                                 | -0.834512 | 2.589558  | -0.188792 |
| O                                                                 | -0.521761 | 1.862150  | 1.436380  |
| O                                                                 | 0.411502  | 1.896652  | -1.262853 |
| O                                                                 | 0.086005  | 4.254996  | 0.158548  |
| H                                                                 | 1.037544  | 4.115264  | 0.237427  |
| I                                                                 | 0.404381  | -0.329622 | 1.981247  |
| O                                                                 | -0.152236 | -0.672097 | 0.291413  |
| O                                                                 | 1.160804  | -2.024830 | 2.277697  |
| O                                                                 | -1.255166 | -0.750578 | 2.796319  |
| H                                                                 | -1.917628 | -1.085831 | 2.143348  |
| I                                                                 | -2.226107 | -0.938503 | -0.785576 |
| O                                                                 | -2.936438 | -1.388901 | 0.784247  |
| O                                                                 | -2.326038 | 0.885268  | -0.751632 |
| O                                                                 | -3.847515 | -1.187946 | -1.790233 |
| H                                                                 | -4.604398 | -1.109004 | -1.195938 |
| I                                                                 | 2.417845  | 0.052254  | -0.948102 |
| O                                                                 | 3.720788  | 1.173973  | -1.311192 |
| O                                                                 | 2.218917  | 0.291843  | 0.879390  |

|   |          |           |           |
|---|----------|-----------|-----------|
| O | 3.435565 | -1.540089 | -0.840848 |
| H | 2.797811 | -2.283836 | -0.667456 |

| (HNO <sub>3</sub> ) <sub>1</sub> (HIO <sub>3</sub> ) <sub>4</sub> (HIO <sub>2</sub> ) <sub>1</sub> | X         | Y         | Z         |
|----------------------------------------------------------------------------------------------------|-----------|-----------|-----------|
| N                                                                                                  | 2.252174  | 2.434297  | 1.046334  |
| O                                                                                                  | 3.213185  | 1.938829  | 1.639223  |
| H                                                                                                  | 4.432410  | 1.222741  | 0.583474  |
| O                                                                                                  | 2.272360  | 2.576644  | -0.192086 |
| O                                                                                                  | 1.230371  | 2.777181  | 1.681824  |
| I                                                                                                  | -3.614825 | 0.153836  | 0.045401  |
| O                                                                                                  | -2.854951 | -1.072182 | -1.010317 |
| O                                                                                                  | -2.673836 | 0.071391  | 1.563979  |
| O                                                                                                  | -5.113992 | -0.941535 | 0.611702  |
| H                                                                                                  | -4.818236 | -1.837257 | 0.811371  |
| I                                                                                                  | -0.109891 | -0.695147 | 2.078654  |
| O                                                                                                  | 1.540252  | -1.275708 | 2.406783  |
| O                                                                                                  | 0.116511  | 0.072417  | 0.413731  |
| O                                                                                                  | -0.066256 | 0.923816  | 3.049731  |
| H                                                                                                  | 0.553132  | 1.596907  | 2.657835  |
| I                                                                                                  | -0.390687 | 2.187621  | -0.879372 |
| O                                                                                                  | 0.198647  | 1.088040  | -2.149514 |
| O                                                                                                  | -2.173170 | 1.821216  | -0.839436 |
| O                                                                                                  | -0.524425 | 3.759147  | -1.983773 |
| H                                                                                                  | -0.542753 | 3.477797  | -2.907582 |
| I                                                                                                  | -0.226526 | -1.793823 | -1.184623 |
| O                                                                                                  | 1.540130  | -1.974624 | -1.464881 |
| O                                                                                                  | -0.425340 | -2.511583 | 0.469429  |
| O                                                                                                  | -0.757542 | -3.388132 | -2.116294 |
| H                                                                                                  | -0.328975 | -4.153125 | -1.712402 |
| I                                                                                                  | 3.415903  | -0.539392 | -0.635007 |
| O                                                                                                  | 4.851163  | 0.574875  | -0.028832 |
| O                                                                                                  | 3.527701  | -1.851118 | 0.738867  |
| H                                                                                                  | 2.812129  | -1.650557 | 1.394138  |

| (HNO <sub>3</sub> ) <sub>1</sub> (HIO <sub>3</sub> ) <sub>5</sub> | X         | Y         | Z         |
|-------------------------------------------------------------------|-----------|-----------|-----------|
| N                                                                 | -2.909959 | -2.951893 | 0.784056  |
| O                                                                 | -3.160359 | -1.975891 | 1.692021  |
| H                                                                 | -2.275966 | -1.644369 | 2.032925  |
| O                                                                 | -1.760130 | -3.291116 | 0.645616  |
| O                                                                 | -3.875801 | -3.367216 | 0.222218  |
| I                                                                 | 0.443484  | 2.181988  | -0.938658 |
| O                                                                 | 0.424420  | 2.924872  | 0.686556  |
| O                                                                 | -1.334928 | 2.078343  | -1.322031 |
| O                                                                 | 0.725426  | 3.832706  | -1.901540 |

|   |           |           |           |
|---|-----------|-----------|-----------|
| H | 0.337239  | 4.561359  | -1.402219 |
| I | 3.753885  | -0.693269 | 0.075910  |
| O | 3.129817  | -0.953455 | 1.731572  |
| O | 3.015100  | 0.828203  | -0.483568 |
| O | 5.487825  | 0.036795  | 0.558214  |
| H | 5.379649  | 0.825123  | 1.102927  |
| I | -0.322799 | 0.619117  | 2.148715  |
| O | 0.182690  | 0.210720  | 0.430322  |
| O | -0.954602 | -0.963566 | 2.678143  |
| O | 1.385304  | 0.547583  | 2.928603  |
| H | 2.029548  | -0.056778 | 2.452111  |
| I | -3.126058 | 0.801062  | -0.509190 |
| O | -2.481198 | 1.081907  | 1.157515  |
| O | -2.383766 | -0.724591 | -1.051138 |
| O | -4.795742 | 0.050859  | 0.083486  |
| H | -4.625137 | -0.716814 | 0.651589  |
| I | 0.216960  | -1.734775 | -1.253949 |
| O | 1.932019  | -2.070154 | -0.790109 |
| O | 0.401177  | -0.362760 | -2.369943 |
| O | 0.052668  | -3.103966 | -2.598028 |
| H | 0.435051  | -2.767966 | -3.418856 |

| (HNO <sub>3</sub> ) <sub>2</sub> | X         | Y         | Z         |
|----------------------------------|-----------|-----------|-----------|
| N                                | 2.008830  | -0.073401 | -0.000004 |
| O                                | 1.480241  | 1.165502  | 0.000064  |
| H                                | 0.501255  | 1.048347  | 0.000020  |
| O                                | 1.228135  | -1.013575 | -0.000071 |
| O                                | 3.190652  | -0.130721 | 0.000008  |
| N                                | -2.008830 | 0.073401  | -0.000004 |
| O                                | -1.480240 | -1.165501 | 0.000064  |
| H                                | -0.501254 | -1.048347 | 0.000019  |
| O                                | -1.228135 | 1.013575  | -0.000072 |
| O                                | -3.190653 | 0.130720  | 0.000009  |

| (HNO <sub>3</sub> ) <sub>2</sub> (HIO <sub>2</sub> ) <sub>1</sub> | X         | Y         | Z         |
|-------------------------------------------------------------------|-----------|-----------|-----------|
| O                                                                 | 0.041622  | 0.467921  | 0.854239  |
| I                                                                 | 0.240003  | -1.148935 | -0.050464 |
| O                                                                 | -1.347658 | -2.033782 | 0.595426  |
| H                                                                 | -2.100416 | -1.571060 | 0.194164  |
| N                                                                 | 3.004440  | 1.081376  | -0.175573 |
| O                                                                 | 2.296099  | 1.685373  | 0.775380  |
| H                                                                 | 1.399335  | 1.205468  | 0.834075  |
| O                                                                 | 2.511749  | 0.089083  | -0.714092 |
| O                                                                 | 4.064080  | 1.548482  | -0.428560 |

|   |           |          |           |
|---|-----------|----------|-----------|
| N | -3.026033 | 1.208334 | -0.235726 |
| O | -2.097910 | 1.866991 | 0.465544  |
| H | -1.289181 | 1.265188 | 0.551281  |
| O | -2.735403 | 0.093408 | -0.645910 |
| O | -4.054921 | 1.778275 | -0.405253 |

| (HNO <sub>3</sub> ) <sub>2</sub> (HIO <sub>2</sub> ) <sub>2</sub> | X         | Y         | Z         |
|-------------------------------------------------------------------|-----------|-----------|-----------|
| N                                                                 | 0.045943  | 2.389347  | -0.489043 |
| O                                                                 | 0.374242  | 1.754316  | 0.599910  |
| H                                                                 | -0.984017 | 1.039673  | 1.495783  |
| O                                                                 | -1.105063 | 2.761982  | -0.609871 |
| O                                                                 | 0.919583  | 2.547814  | -1.326721 |
| N                                                                 | -0.045936 | -2.389280 | -0.489353 |
| O                                                                 | 1.105072  | -2.761902 | -0.610213 |
| H                                                                 | 3.161981  | -1.792894 | -0.611758 |
| O                                                                 | -0.374247 | -1.754386 | 0.599676  |
| O                                                                 | -0.919563 | -2.547639 | -1.327064 |
| I                                                                 | -2.239966 | -0.342710 | 0.039701  |
| O                                                                 | -1.719755 | 0.423607  | 1.709379  |
| O                                                                 | -3.608878 | 0.987511  | -0.317806 |
| H                                                                 | -3.162008 | 1.792961  | -0.611538 |
| I                                                                 | 2.239964  | 0.342703  | 0.039753  |
| O                                                                 | 3.608863  | -0.987482 | -0.317937 |
| O                                                                 | 1.719759  | -0.423818 | 1.709339  |
| H                                                                 | 0.984017  | -1.039852 | 1.495669  |

| (HNO <sub>3</sub> ) <sub>2</sub> (HIO <sub>2</sub> ) <sub>3</sub> | X         | Y         | Z         |
|-------------------------------------------------------------------|-----------|-----------|-----------|
| N                                                                 | -3.016938 | 1.853557  | 0.536427  |
| O                                                                 | -2.217854 | 1.211602  | -0.255632 |
| H                                                                 | -0.245762 | 0.768234  | -1.385693 |
| O                                                                 | -2.782210 | 3.030063  | 0.746063  |
| O                                                                 | -3.949830 | 1.236747  | 1.026597  |
| N                                                                 | 0.606287  | -2.942433 | 0.811650  |
| O                                                                 | 0.817593  | -2.076780 | -0.145381 |
| H                                                                 | -0.476743 | -1.432639 | -0.922669 |
| O                                                                 | -0.546054 | -3.323771 | 0.976768  |
| O                                                                 | 1.546145  | -3.314195 | 1.469844  |
| I                                                                 | -2.759343 | -1.055242 | -0.253869 |
| O                                                                 | -1.204433 | -0.943445 | -1.393063 |
| O                                                                 | -2.926628 | -2.970103 | -0.522901 |
| H                                                                 | -2.207392 | -3.385969 | -0.020107 |
| I                                                                 | 0.814742  | 2.248687  | 0.206736  |
| O                                                                 | 0.563490  | 1.308338  | -1.448495 |
| O                                                                 | -0.263889 | 3.770153  | -0.331097 |

|   |           |           |           |
|---|-----------|-----------|-----------|
| H | -1.187919 | 3.594463  | -0.070008 |
| I | 2.911887  | -0.829641 | -0.175246 |
| O | 1.995977  | 0.414181  | 0.864344  |
| O | 4.546899  | 0.233397  | -0.437589 |
| H | 5.092496  | 0.186911  | 0.352380  |

| $(\text{HNO}_3)_2(\text{HIO}_2)_4$ | X         | Y         | Z         |
|------------------------------------|-----------|-----------|-----------|
| N                                  | 1.231410  | -0.776436 | 2.328894  |
| O                                  | 0.359631  | 0.039415  | 2.624449  |
| H                                  | 2.579107  | 1.313993  | 1.982440  |
| O                                  | 2.435961  | -0.443650 | 2.297660  |
| O                                  | 0.915510  | -1.944117 | 2.013093  |
| N                                  | -0.607041 | -1.438517 | -2.239246 |
| O                                  | -0.076174 | -2.516958 | -1.977285 |
| H                                  | -0.666663 | -3.612246 | -0.161314 |
| O                                  | 0.119388  | -0.426541 | -2.462579 |
| O                                  | -1.834763 | -1.294759 | -2.265125 |
| I                                  | -2.797961 | 1.497451  | -0.520316 |
| O                                  | -2.130182 | 0.763793  | 1.030665  |
| O                                  | -1.198704 | 1.794522  | -1.576161 |
| H                                  | -0.915931 | 0.959600  | -2.022374 |
| I                                  | -1.454496 | -1.708362 | 1.054863  |
| O                                  | -1.068921 | -3.575418 | 0.718621  |
| O                                  | -3.148320 | -1.851470 | 0.121902  |
| H                                  | -2.926584 | -1.839367 | -0.825640 |
| I                                  | 1.207787  | 2.133539  | 0.207108  |
| O                                  | 2.598604  | 2.179124  | 1.517547  |
| O                                  | -0.099722 | 3.059405  | 1.342936  |
| H                                  | -0.577537 | 2.379181  | 1.836596  |
| I                                  | 2.432865  | -0.893951 | -1.131261 |
| O                                  | 2.632875  | 0.962265  | -1.169216 |
| O                                  | 3.874761  | -1.365828 | 0.063980  |
| H                                  | 3.523124  | -1.254658 | 0.967986  |

| $(\text{HNO}_3)_2(\text{HIO}_3)_1$ | X         | Y         | Z         |
|------------------------------------|-----------|-----------|-----------|
| I                                  | -0.311449 | -0.929552 | -0.164173 |
| O                                  | 0.432211  | 0.339391  | -1.175086 |
| O                                  | -0.649593 | -0.148939 | 1.410087  |
| O                                  | 1.231765  | -1.938995 | 0.293530  |
| H                                  | 1.958832  | -1.313965 | 0.500749  |
| N                                  | 3.527701  | 0.987124  | 0.104615  |
| O                                  | 2.796112  | 1.476918  | -0.907226 |
| H                                  | 1.920552  | 0.999774  | -0.909933 |
| O                                  | 3.041683  | 0.085849  | 0.770769  |

|   |           |          |           |
|---|-----------|----------|-----------|
| O | 4.591181  | 1.488718 | 0.262194  |
| N | -3.309047 | 1.005473 | 0.006416  |
| O | -2.775074 | 1.350056 | 1.179814  |
| H | -1.951915 | 0.784724 | 1.303754  |
| O | -2.734860 | 0.135129 | -0.647399 |
| O | -4.302329 | 1.567816 | -0.308012 |

| $(\text{HNO}_3)_2(\text{HIO}_3)_1(\text{HIO}_2)_1$ | X         | Y         | Z         |
|----------------------------------------------------|-----------|-----------|-----------|
| N                                                  | -0.741666 | -2.616878 | -0.682143 |
| O                                                  | -0.675619 | -1.829570 | 0.345404  |
| H                                                  | 1.577280  | -2.763854 | 0.061456  |
| O                                                  | 0.247616  | -3.309280 | -0.910582 |
| O                                                  | -1.748634 | -2.624658 | -1.354810 |
| N                                                  | 1.146825  | 3.141673  | -0.607421 |
| O                                                  | -0.167543 | 3.002610  | -0.790544 |
| H                                                  | -0.378747 | 2.026822  | -0.962258 |
| O                                                  | 1.846405  | 2.147184  | -0.748080 |
| O                                                  | 1.524890  | 4.234533  | -0.339012 |
| I                                                  | -2.091241 | 0.026468  | 0.197753  |
| O                                                  | -1.169886 | 0.484461  | 1.667056  |
| O                                                  | -1.035307 | 0.604378  | -1.136517 |
| O                                                  | -3.291374 | 1.549331  | 0.275397  |
| H                                                  | -2.837598 | 2.321137  | 0.634801  |
| I                                                  | 2.162184  | -0.446339 | 0.075558  |
| O                                                  | 2.376912  | -2.304057 | 0.425517  |
| O                                                  | 1.420653  | 0.145914  | 1.710037  |
| H                                                  | 0.418071  | 0.188683  | 1.656550  |

| $(\text{HNO}_3)_2(\text{HIO}_3)_1(\text{HIO}_2)_2$ | X         | Y         | Z         |
|----------------------------------------------------|-----------|-----------|-----------|
| H                                                  | 2.232570  | -0.438083 | -1.290641 |
| I                                                  | -1.491796 | -0.023449 | -1.361548 |
| O                                                  | -0.689693 | -1.238963 | -0.275958 |
| O                                                  | -2.270365 | 1.062941  | -0.152208 |
| O                                                  | -3.066197 | -1.100614 | -1.633049 |
| H                                                  | -3.507514 | -1.279742 | -0.784626 |
| I                                                  | 1.443297  | -2.176213 | 0.071149  |
| O                                                  | 1.897091  | -1.315297 | -1.571252 |
| O                                                  | 3.222229  | -2.867618 | 0.373206  |
| H                                                  | 3.740323  | -2.123629 | 0.725308  |
| I                                                  | 0.727443  | 2.357679  | 0.156107  |
| O                                                  | 0.230153  | 1.312967  | -1.339074 |
| O                                                  | -0.819963 | 3.536107  | 0.050278  |
| H                                                  | -1.600548 | 2.976974  | 0.180927  |
| N                                                  | -3.980375 | -0.923299 | 2.072551  |

|   |           |           |           |
|---|-----------|-----------|-----------|
| O | -3.272627 | 0.218970  | 2.123836  |
| H | -2.952868 | 0.422685  | 1.199848  |
| O | -4.105896 | -1.460474 | 0.988469  |
| O | -4.419219 | -1.300364 | 3.111373  |
| N | 3.260265  | 0.766037  | 1.071013  |
| O | 3.160132  | 1.700807  | 1.842267  |
| O | 3.953071  | -0.220251 | 1.271903  |
| O | 2.574380  | 0.817753  | -0.029583 |

| $(\text{HNO}_3)_2(\text{HIO}_3)_1(\text{HIO}_2)_3$ | X         | Y         | Z         |
|----------------------------------------------------|-----------|-----------|-----------|
| H                                                  | 2.041693  | 3.085921  | 1.628396  |
| O                                                  | 2.050842  | 3.497019  | 0.754893  |
| I                                                  | 0.983258  | 2.373557  | -0.396735 |
| O                                                  | -0.652247 | 3.261070  | 0.119017  |
| H                                                  | -0.989617 | 2.803740  | 0.909334  |
| O                                                  | 2.547522  | -2.841217 | -0.274939 |
| I                                                  | 1.505960  | -1.911041 | 1.031890  |
| O                                                  | 2.830349  | -2.078744 | 2.452002  |
| H                                                  | 3.430028  | -1.326930 | 2.422084  |
| O                                                  | -0.214774 | -1.774812 | -0.601075 |
| I                                                  | -0.659727 | -0.867525 | -2.116284 |
| O                                                  | -2.363952 | -1.385391 | -2.291354 |
| H                                                  | -3.578651 | -1.424603 | -0.969107 |
| O                                                  | -0.865843 | 0.846179  | -1.528269 |
| O                                                  | -4.098899 | -1.203673 | -0.161638 |
| I                                                  | -2.924920 | -0.161254 | 0.942638  |
| O                                                  | -3.109677 | 1.462539  | -0.043991 |
| H                                                  | -2.380999 | 1.437072  | -0.705316 |
| N                                                  | 3.092559  | 0.255790  | -1.239297 |
| O                                                  | 3.918070  | -0.640066 | -1.065708 |
| H                                                  | 3.095626  | -2.168138 | -0.737211 |
| O                                                  | 2.047835  | 0.053967  | -1.889581 |
| O                                                  | 3.279529  | 1.385449  | -0.735273 |
| N                                                  | -0.240079 | 0.680311  | 2.489406  |
| O                                                  | -0.348864 | -0.551603 | 2.608169  |
| O                                                  | 0.810139  | 1.264346  | 2.684770  |
| O                                                  | -1.270998 | 1.336457  | 2.128111  |

| $(\text{HNO}_3)_2(\text{HIO}_3)_2$ | X         | Y        | Z         |
|------------------------------------|-----------|----------|-----------|
| N                                  | -3.740984 | 0.567886 | 0.166542  |
| O                                  | -3.352500 | 1.673584 | -0.478151 |
| H                                  | -2.400323 | 1.848868 | -0.226889 |
| O                                  | -2.920492 | 0.029034 | 0.894571  |
| O                                  | -4.859897 | 0.218129 | -0.027062 |

|   |           |           |           |
|---|-----------|-----------|-----------|
| N | 3.740986  | -0.567884 | -0.166526 |
| O | 3.352495  | -1.673581 | 0.478163  |
| H | 2.400321  | -1.848866 | 0.226891  |
| O | 2.920503  | -0.029037 | -0.894570 |
| O | 4.859896  | -0.218125 | 0.027094  |
| I | -0.609236 | -1.486097 | 0.227845  |
| O | -0.581143 | -0.230848 | -1.120740 |
| O | 0.892617  | -2.409666 | -0.039698 |
| O | -1.767669 | -2.654074 | -0.774407 |
| H | -1.404539 | -2.826590 | -1.651184 |
| I | 0.609236  | 1.486096  | -0.227852 |
| O | -0.892616 | 2.409666  | 0.039691  |
| O | 0.581140  | 0.230848  | 1.120734  |
| O | 1.767665  | 2.654072  | 0.774408  |
| H | 1.404530  | 2.826589  | 1.651184  |

| $(\text{HNO}_3)_2(\text{HIO}_3)_2(\text{HIO}_2)_1$ | X         | Y         | Z         |
|----------------------------------------------------|-----------|-----------|-----------|
| N                                                  | -3.089710 | 1.029282  | -0.971113 |
| O                                                  | -2.354734 | 1.160056  | 0.092025  |
| H                                                  | -3.688871 | -0.967483 | 0.427968  |
| O                                                  | -3.931820 | 0.139478  | -0.953926 |
| O                                                  | -2.901419 | 1.777351  | -1.906318 |
| N                                                  | 2.834733  | 0.967806  | 1.837969  |
| O                                                  | 2.296890  | -0.095736 | 2.426975  |
| H                                                  | 1.868636  | -0.637501 | 1.698592  |
| O                                                  | 2.862907  | 0.970316  | 0.606856  |
| O                                                  | 3.251562  | 1.819419  | 2.548793  |
| I                                                  | 1.633506  | -1.146911 | -1.178677 |
| O                                                  | 0.435513  | -2.096084 | -2.066245 |
| O                                                  | 1.135644  | -1.498604 | 0.539195  |
| O                                                  | 3.107035  | -2.403223 | -1.219413 |
| H                                                  | 2.779907  | -3.307047 | -1.135636 |
| I                                                  | -0.313038 | 2.206359  | -0.309503 |
| O                                                  | 0.116013  | 0.753008  | -1.297977 |
| O                                                  | -0.040944 | 1.680266  | 1.379608  |
| O                                                  | 1.363820  | 3.133528  | -0.511331 |
| H                                                  | 2.088906  | 2.615367  | -0.122548 |
| I                                                  | -1.472869 | -1.746862 | 0.868790  |
| O                                                  | -3.374294 | -1.675960 | 1.038189  |
| O                                                  | -1.019548 | -0.605748 | 2.315506  |
| H                                                  | -0.759440 | 0.285455  | 1.955807  |

| $(\text{HNO}_3)_2(\text{HIO}_3)_2(\text{HIO}_2)_2$ | X        | Y        | Z         |
|----------------------------------------------------|----------|----------|-----------|
| N                                                  | 0.153740 | 0.393962 | -2.531328 |

|   |           |           |           |
|---|-----------|-----------|-----------|
| O | 1.319600  | 0.315347  | -2.930221 |
| H | -0.113728 | -2.596098 | -1.609131 |
| O | -0.413005 | 1.470871  | -2.379950 |
| O | -0.471211 | -0.680626 | -2.276179 |
| N | 1.529025  | 0.135340  | 2.595250  |
| O | 2.657945  | -0.302898 | 2.366826  |
| H | 1.319933  | 2.681210  | 0.037532  |
| O | 1.327543  | 1.337988  | 2.786019  |
| O | 0.548801  | -0.659103 | 2.640617  |
| I | -3.636917 | -0.537242 | -0.254806 |
| O | -3.318207 | 1.162232  | 0.213092  |
| O | -2.483051 | -1.506017 | 0.697345  |
| O | -2.976459 | -0.634060 | -2.000019 |
| H | -1.946362 | -0.564936 | -2.080640 |
| I | 3.188224  | 0.315896  | -0.978651 |
| O | 1.724036  | 0.963031  | -0.188761 |
| O | 3.042944  | -1.457173 | -0.909938 |
| O | 4.387390  | 0.648876  | 0.461574  |
| H | 3.889328  | 0.457025  | 1.294366  |
| I | -0.982821 | 2.347655  | 0.338108  |
| O | 0.620660  | 3.363445  | 0.098108  |
| O | -1.067349 | 2.468175  | 2.240863  |
| H | -0.318974 | 1.918938  | 2.587931  |
| I | 0.136479  | -2.228875 | 0.743817  |
| O | -0.319262 | -3.195323 | -0.875312 |
| O | 1.864268  | -3.007225 | 0.928134  |
| H | 2.470194  | -2.465547 | 0.376162  |

| $(\text{HNO}_3)_2(\text{HIO}_3)_3$ | X         | Y         | Z         |
|------------------------------------|-----------|-----------|-----------|
| N                                  | -1.432455 | -3.111090 | -1.678444 |
| O                                  | -1.439656 | -3.683006 | -0.470804 |
| H                                  | -0.723710 | -3.240480 | 0.068441  |
| O                                  | -0.640951 | -2.193855 | -1.852339 |
| O                                  | -2.195597 | -3.554000 | -2.472791 |
| N                                  | -4.359548 | 1.774398  | 1.662438  |
| O                                  | -3.558675 | 2.759243  | 1.232676  |
| H                                  | -2.947421 | 2.379759  | 0.537380  |
| O                                  | -4.224698 | 0.671229  | 1.159956  |
| O                                  | -5.135392 | 2.074638  | 2.511104  |
| I                                  | -1.249664 | 0.433630  | -1.033175 |
| O                                  | -0.679096 | -0.145201 | 0.594013  |
| O                                  | -1.877303 | 2.053447  | -0.640291 |
| O                                  | -2.913362 | -0.497256 | -1.003957 |
| H                                  | -3.461823 | -0.127880 | -0.283413 |

|   |          |           |           |
|---|----------|-----------|-----------|
| I | 2.540999 | 1.290831  | -0.576266 |
| O | 0.939909 | 1.485672  | -1.388388 |
| O | 2.216031 | 1.427609  | 1.175219  |
| O | 3.121139 | 3.116622  | -0.836823 |
| H | 2.558187 | 3.724835  | -0.343144 |
| I | 1.192258 | -1.222226 | 1.400501  |
| O | 0.430540 | -2.812097 | 1.136561  |
| O | 1.986153 | -0.923720 | -0.218030 |
| O | 2.781746 | -1.930663 | 2.242632  |
| H | 3.002015 | -2.787145 | 1.856708  |

| $(\text{HNO}_3)_2(\text{HIO}_3)_3(\text{HIO}_2)_1$ | X         | Y         | Z         |
|----------------------------------------------------|-----------|-----------|-----------|
| N                                                  | 2.654750  | -2.228315 | -0.383436 |
| O                                                  | 3.515124  | -1.756003 | 0.378770  |
| H                                                  | 4.218653  | -0.321425 | -0.166399 |
| O                                                  | 2.529149  | -1.810010 | -1.537524 |
| O                                                  | 1.876535  | -3.113690 | 0.047533  |
| N                                                  | -4.358646 | -0.048937 | 0.443344  |
| O                                                  | -3.887199 | -1.167341 | 1.021776  |
| H                                                  | -3.113539 | -1.470353 | 0.470150  |
| O                                                  | -3.882363 | 0.251740  | -0.636979 |
| O                                                  | -5.203208 | 0.528913  | 1.047630  |
| I                                                  | -1.401697 | 1.985521  | -0.557188 |
| O                                                  | 0.305392  | 2.477127  | -0.762891 |
| O                                                  | -1.458646 | 1.102844  | 1.013735  |
| O                                                  | -2.050671 | 3.649136  | 0.172774  |
| H                                                  | -1.624838 | 3.841557  | 1.017095  |
| I                                                  | -0.553939 | -1.709343 | -1.353282 |
| O                                                  | -0.991840 | -0.018681 | -1.837734 |
| O                                                  | -1.664629 | -2.095859 | 0.015742  |
| O                                                  | -1.646973 | -2.508832 | -2.729659 |
| H                                                  | -2.514639 | -2.089305 | -2.767176 |
| I                                                  | -0.069491 | -0.769021 | 1.977707  |
| O                                                  | 1.011038  | 0.386996  | 2.788003  |
| O                                                  | 0.600239  | -0.646810 | 0.284119  |
| O                                                  | 0.774040  | -2.410671 | 2.382957  |
| H                                                  | 1.338078  | -2.715289 | 1.614803  |
| I                                                  | 2.728757  | 1.496042  | -0.503244 |
| O                                                  | 4.420343  | 0.631934  | -0.374457 |
| O                                                  | 2.543565  | 2.021007  | 1.314170  |
| H                                                  | 2.012038  | 1.351679  | 1.816843  |

| $(\text{HNO}_3)_2(\text{HIO}_3)_4$ | X         | Y         | Z        |
|------------------------------------|-----------|-----------|----------|
| N                                  | -3.272930 | -1.352569 | 1.897361 |

|   |           |           |           |
|---|-----------|-----------|-----------|
| O | -3.678291 | -1.159113 | 0.617741  |
| H | -3.501053 | -0.190132 | 0.388298  |
| O | -2.807997 | -0.392010 | 2.471827  |
| O | -3.419568 | -2.455538 | 2.313854  |
| N | 1.049753  | 3.611651  | 0.013109  |
| O | 1.550360  | 3.011749  | -1.074464 |
| H | 2.271784  | 2.387769  | -0.760936 |
| O | 1.659219  | 3.475342  | 1.052632  |
| O | 0.039698  | 4.227104  | -0.159917 |
| I | 3.224509  | -0.453743 | -0.185271 |
| O | 3.414451  | 1.301036  | -0.451003 |
| O | 1.776805  | -0.875736 | -1.160927 |
| O | 4.542121  | -1.024926 | -1.479605 |
| H | 4.401106  | -0.592832 | -2.330163 |
| I | -1.944678 | 1.536800  | -1.315337 |
| O | -3.271774 | 1.279945  | -0.140901 |
| O | -1.616079 | -0.115511 | -1.907511 |
| O | -3.023394 | 2.139812  | -2.800286 |
| H | -3.740094 | 1.517753  | -2.973236 |
| I | -0.286830 | -2.319327 | -0.872178 |
| O | -0.527786 | -1.554968 | 0.784875  |
| O | 0.658874  | -3.759509 | -0.513177 |
| O | -2.019022 | -3.145295 | -0.862168 |
| H | -2.679489 | -2.530543 | -0.500249 |
| I | 0.076198  | 0.287028  | 1.916839  |
| O | -0.312536 | 1.245042  | 0.441364  |
| O | 1.825692  | -0.109421 | 1.670719  |
| O | 0.375789  | 1.832477  | 3.005992  |
| H | 0.809972  | 2.540358  | 2.495853  |

| (HNO <sub>3</sub> ) <sub>3</sub> | X         | Y         | Z         |
|----------------------------------|-----------|-----------|-----------|
| N                                | -2.489276 | -0.713745 | 0.162763  |
| O                                | -2.398031 | 0.205547  | -0.823552 |
| H                                | -1.472085 | 0.538452  | -0.810951 |
| O                                | -1.464310 | -0.983554 | 0.766807  |
| O                                | -3.570133 | -1.161214 | 0.344516  |
| N                                | 0.463351  | 2.118792  | -0.105470 |
| O                                | 1.545555  | 2.046011  | 0.687115  |
| H                                | 1.800271  | 1.095137  | 0.694689  |
| O                                | 0.183815  | 1.104882  | -0.731087 |
| O                                | -0.102866 | 3.158567  | -0.125761 |
| N                                | 2.008011  | -1.421074 | -0.029051 |
| O                                | 0.830266  | -1.944684 | -0.419609 |
| H                                | 0.136136  | -1.496610 | 0.111776  |

|   |          |           |           |
|---|----------|-----------|-----------|
| O | 1.974090 | -0.638960 | 0.907788  |
| O | 2.959248 | -1.789693 | -0.630369 |

| (HNO <sub>3</sub> ) <sub>3</sub> (HIO <sub>2</sub> ) <sub>1</sub> | X         | Y         | Z         |
|-------------------------------------------------------------------|-----------|-----------|-----------|
| I                                                                 | -0.121056 | -0.419199 | 0.141625  |
| O                                                                 | 1.466136  | 0.276226  | 0.823495  |
| O                                                                 | -1.262009 | 0.994258  | 0.883032  |
| H                                                                 | -0.951623 | 1.817551  | 0.463107  |
| N                                                                 | -3.883616 | -0.703047 | -0.227538 |
| O                                                                 | -3.888910 | 0.384064  | 0.574045  |
| H                                                                 | -2.940403 | 0.631445  | 0.698096  |
| O                                                                 | -2.794441 | -1.125900 | -0.577937 |
| O                                                                 | -4.947995 | -1.139153 | -0.509877 |
| N                                                                 | 2.708106  | -2.454000 | -0.242749 |
| O                                                                 | 3.224558  | -1.569594 | 0.604288  |
| H                                                                 | 2.535660  | -0.827403 | 0.724204  |
| O                                                                 | 1.552464  | -2.267224 | -0.635553 |
| O                                                                 | 3.399023  | -3.362641 | -0.556717 |
| N                                                                 | 1.253358  | 3.375986  | -0.390138 |
| O                                                                 | 2.215895  | 2.656150  | 0.188467  |
| H                                                                 | 1.846817  | 1.731479  | 0.383708  |
| O                                                                 | 0.172449  | 2.829095  | -0.579220 |
| O                                                                 | 1.535404  | 4.491208  | -0.683055 |

| (HNO <sub>3</sub> ) <sub>3</sub> (HIO <sub>2</sub> ) <sub>2</sub> | X         | Y         | Z         |
|-------------------------------------------------------------------|-----------|-----------|-----------|
| N                                                                 | -0.583904 | -2.175846 | -0.202999 |
| O                                                                 | -0.942653 | -1.748911 | -1.316678 |
| H                                                                 | 0.253204  | -0.897108 | -2.339812 |
| O                                                                 | 0.522854  | -2.652319 | -0.011985 |
| O                                                                 | -1.400537 | -2.097134 | 0.762132  |
| N                                                                 | 4.326665  | 0.244516  | 1.736782  |
| O                                                                 | 4.746063  | -0.839355 | 1.056418  |
| H                                                                 | 4.074273  | -0.995626 | 0.339918  |
| O                                                                 | 3.315687  | 0.799242  | 1.333970  |
| O                                                                 | 4.989019  | 0.558860  | 2.667961  |
| N                                                                 | -0.740333 | 2.115456  | -0.299089 |
| O                                                                 | -1.834957 | 2.588115  | -0.532888 |
| H                                                                 | -3.857566 | 1.854156  | -0.073679 |
| O                                                                 | -0.422315 | 1.664015  | 0.812177  |
| O                                                                 | 0.124615  | 2.064059  | -1.238908 |
| I                                                                 | 1.692607  | 0.339634  | -0.931857 |
| O                                                                 | 0.973110  | -0.276568 | -2.586322 |
| O                                                                 | 2.906645  | -1.235459 | -0.838073 |
| H                                                                 | 2.331182  | -1.984685 | -0.612550 |

|   |           |           |          |
|---|-----------|-----------|----------|
| I | -3.054848 | -0.364387 | 0.416828 |
| O | -4.343470 | 1.076214  | 0.235755 |
| O | -2.380155 | 0.247390  | 2.091853 |
| H | -1.650576 | 0.861068  | 1.856476 |

| (HNO <sub>3</sub> ) <sub>3</sub> (HIO <sub>2</sub> ) <sub>3</sub> | X         | Y         | Z         |
|-------------------------------------------------------------------|-----------|-----------|-----------|
| N                                                                 | 0.092000  | -2.692309 | 1.287032  |
| O                                                                 | 0.168920  | -2.416272 | 0.006736  |
| H                                                                 | -1.152444 | -1.681039 | -0.685388 |
| O                                                                 | -1.029172 | -2.798443 | 1.765390  |
| O                                                                 | 1.115753  | -2.823053 | 1.909426  |
| N                                                                 | 2.992474  | 1.771915  | 2.506795  |
| O                                                                 | 3.078389  | 0.440844  | 2.343842  |
| H                                                                 | 2.609822  | 0.221224  | 1.482033  |
| O                                                                 | 2.381543  | 2.400385  | 1.659636  |
| O                                                                 | 3.526991  | 2.210074  | 3.473553  |
| N                                                                 | -2.988404 | 2.255918  | 0.205509  |
| O                                                                 | -2.432429 | 1.331400  | -0.513206 |
| H                                                                 | -0.721573 | 0.270518  | -1.785155 |
| O                                                                 | -2.555877 | 3.390135  | 0.101034  |
| O                                                                 | -3.902113 | 1.930435  | 0.945546  |
| I                                                                 | 0.759786  | 1.861038  | -0.723292 |
| O                                                                 | 0.111164  | 0.677694  | -2.088543 |
| O                                                                 | -0.168547 | 3.426552  | -1.349185 |
| H                                                                 | -1.051231 | 3.460414  | -0.924993 |
| I                                                                 | 2.294720  | -1.687334 | -0.852071 |
| O                                                                 | 1.920838  | -0.114189 | 0.080473  |
| O                                                                 | 3.899829  | -1.012150 | -1.757844 |
| H                                                                 | 4.652916  | -1.043010 | -1.161016 |
| I                                                                 | -3.198495 | -0.747801 | 0.190565  |
| O                                                                 | -1.862730 | -1.163575 | -1.146621 |
| O                                                                 | -3.571561 | -2.626422 | 0.501814  |
| H                                                                 | -2.826516 | -2.976940 | 1.017025  |

| (HNO <sub>3</sub> ) <sub>3</sub> (HIO <sub>3</sub> ) <sub>1</sub> | X         | Y         | Z         |
|-------------------------------------------------------------------|-----------|-----------|-----------|
| I                                                                 | 0.319295  | -0.038131 | -0.879329 |
| O                                                                 | 0.057382  | -1.799977 | -1.020847 |
| O                                                                 | -0.333469 | 0.306001  | 0.768247  |
| O                                                                 | -1.148490 | 0.574312  | -1.906580 |
| H                                                                 | -1.969167 | 0.232505  | -1.496060 |
| N                                                                 | 0.744014  | 3.398110  | 0.544910  |
| O                                                                 | 0.089682  | 2.814971  | 1.565071  |
| H                                                                 | -0.062728 | 1.871322  | 1.289438  |
| O                                                                 | 1.002326  | 2.696762  | -0.423170 |

|   |           |           |           |
|---|-----------|-----------|-----------|
| O | 1.010452  | 4.543805  | 0.685402  |
| N | 2.734185  | -2.068560 | 0.746246  |
| O | 1.855886  | -3.021763 | 0.428954  |
| H | 1.148617  | -2.591476 | -0.141642 |
| O | 2.525947  | -0.932976 | 0.315702  |
| O | 3.651391  | -2.396352 | 1.417451  |
| N | -3.543551 | -0.929740 | 0.663596  |
| O | -2.599812 | -0.846671 | 1.620497  |
| H | -1.795481 | -0.436171 | 1.211335  |
| O | -3.261619 | -0.508748 | -0.444785 |
| O | -4.572981 | -1.411102 | 1.001319  |

| $(\text{HNO}_3)_3(\text{HIO}_3)_1(\text{HIO}_2)_1$ | X         | Y         | Z         |
|----------------------------------------------------|-----------|-----------|-----------|
| N                                                  | 4.126821  | -1.406677 | 0.468529  |
| O                                                  | 3.887445  | -0.437612 | -0.429248 |
| H                                                  | 2.908901  | -0.245471 | -0.402887 |
| O                                                  | 3.164803  | -1.891424 | 1.042318  |
| O                                                  | 5.267242  | -1.698152 | 0.621856  |
| N                                                  | 0.711768  | 3.544201  | 1.736156  |
| O                                                  | -0.348173 | 2.723336  | 1.869679  |
| H                                                  | -0.532192 | 2.326575  | 0.976689  |
| O                                                  | 1.211456  | 3.640821  | 0.631473  |
| O                                                  | 1.055531  | 4.099215  | 2.728350  |
| N                                                  | -3.940224 | -0.148087 | 0.454791  |
| O                                                  | -3.612535 | 0.838847  | -0.381100 |
| H                                                  | -2.625760 | 1.007826  | -0.296822 |
| O                                                  | -3.043666 | -0.622376 | 1.144072  |
| O                                                  | -5.081956 | -0.469459 | 0.465436  |
| I                                                  | 0.098112  | 0.748939  | -1.496358 |
| O                                                  | -1.099775 | 1.513687  | -0.368379 |
| O                                                  | 1.338099  | 0.123857  | -0.362751 |
| O                                                  | 0.982703  | 2.401171  | -1.916404 |
| H                                                  | 1.124786  | 2.922200  | -1.106179 |
| I                                                  | -0.796436 | -1.992418 | 0.529966  |
| O                                                  | -0.981371 | -1.156704 | -1.133948 |
| O                                                  | 0.793567  | -3.010236 | 0.212838  |
| H                                                  | 1.579931  | -2.472588 | 0.438071  |

| $(\text{HNO}_3)_3(\text{HIO}_3)_1(\text{HIO}_2)_2$ | X        | Y        | Z        |
|----------------------------------------------------|----------|----------|----------|
| N                                                  | 3.264047 | 1.519962 | 1.585686 |
| O                                                  | 2.187255 | 1.295448 | 2.368973 |
| H                                                  | 1.723211 | 0.505875 | 1.976400 |
| O                                                  | 3.465740 | 0.724350 | 0.687990 |
| O                                                  | 3.912330 | 2.474241 | 1.864502 |

|   |           |           |           |
|---|-----------|-----------|-----------|
| N | -2.824600 | -1.712660 | -1.622039 |
| O | -1.665272 | -1.257286 | -2.170067 |
| H | -0.928221 | -1.769915 | -1.735262 |
| O | -2.728577 | -2.617280 | -0.828016 |
| O | -3.807984 | -1.152140 | -1.992910 |
| N | -2.348768 | 1.496315  | 1.660523  |
| O | -1.077408 | 1.231610  | 1.717801  |
| H | 0.135574  | 2.266969  | 0.877395  |
| O | -2.696030 | 2.551683  | 1.156949  |
| O | -3.115884 | 0.660124  | 2.101154  |
| I | 1.812500  | -1.270311 | -0.773555 |
| O | 1.220859  | 0.232802  | -1.583012 |
| O | 0.419287  | -2.383555 | -1.002750 |
| O | 2.804741  | -1.866240 | -2.327354 |
| H | 2.271916  | -1.832051 | -3.129571 |
| I | -0.423635 | 1.977118  | -1.384548 |
| O | 0.612016  | 2.603562  | 0.086735  |
| O | -1.673472 | 3.446652  | -1.367426 |
| H | -2.251318 | 3.319218  | -0.596176 |
| I | -0.873912 | -1.186748 | 1.734033  |
| O | 0.889632  | -0.699711 | 1.223529  |
| O | -0.538542 | -3.096269 | 1.683912  |
| H | -0.547982 | -3.362458 | 0.753630  |

| $(\text{HNO}_3)_3(\text{HIO}_3)_2$ | X         | Y         | Z         |
|------------------------------------|-----------|-----------|-----------|
| N                                  | 4.249982  | 0.784096  | -0.725577 |
| O                                  | 4.026855  | -0.236877 | -1.567254 |
| H                                  | 3.215318  | -0.720661 | -1.244914 |
| O                                  | 3.494549  | 0.904449  | 0.227103  |
| O                                  | 5.167460  | 1.485603  | -0.996150 |
| N                                  | -0.491014 | 3.421160  | 0.006324  |
| O                                  | 0.427630  | 2.803010  | 0.778504  |
| H                                  | 0.371584  | 1.844613  | 0.552128  |
| O                                  | -1.127432 | 2.723572  | -0.762752 |
| O                                  | -0.579673 | 4.594336  | 0.155667  |
| N                                  | -1.369981 | -0.186641 | 3.082152  |
| O                                  | -2.101914 | 0.750891  | 2.466093  |
| H                                  | -2.326724 | 0.403352  | 1.556998  |
| O                                  | -1.133097 | -1.209179 | 2.452422  |
| O                                  | -1.025004 | 0.065216  | 4.188710  |
| I                                  | 0.758156  | -1.470384 | 0.394391  |
| O                                  | 0.088126  | 0.224197  | 0.075968  |
| O                                  | 1.923555  | -1.679805 | -0.935961 |
| O                                  | 1.975131  | -0.862398 | 1.730772  |

|   |           |           |           |
|---|-----------|-----------|-----------|
| H | 2.614526  | -0.246395 | 1.321233  |
| I | -1.720714 | -0.129703 | -1.335143 |
| O | -2.838529 | 0.062231  | 0.037803  |
| O | -1.008197 | -1.796970 | -1.078458 |
| O | -3.034181 | -0.731023 | -2.604483 |
| H | -3.624233 | -1.384641 | -2.209745 |

| (HNO <sub>3</sub> ) <sub>3</sub> (HIO <sub>3</sub> ) <sub>2</sub> (HIO <sub>2</sub> ) <sub>1</sub> | X         | Y         | Z         |
|----------------------------------------------------------------------------------------------------|-----------|-----------|-----------|
| N                                                                                                  | -3.599671 | -2.299757 | 0.562939  |
| O                                                                                                  | -2.296448 | -2.668676 | 0.578982  |
| H                                                                                                  | -1.916321 | -2.435657 | -0.315905 |
| O                                                                                                  | -4.061861 | -1.943269 | -0.498585 |
| O                                                                                                  | -4.156721 | -2.374461 | 1.611502  |
| N                                                                                                  | 3.385192  | -2.816821 | -0.934938 |
| O                                                                                                  | 2.890672  | -2.651255 | 0.306376  |
| H                                                                                                  | 2.898213  | -1.673598 | 0.504834  |
| O                                                                                                  | 3.770284  | -1.824553 | -1.522669 |
| O                                                                                                  | 3.400031  | -3.936195 | -1.333934 |
| N                                                                                                  | -1.082409 | 3.580558  | -0.281302 |
| O                                                                                                  | -2.084684 | 3.022707  | 0.417145  |
| H                                                                                                  | -2.041689 | 2.049119  | 0.216486  |
| O                                                                                                  | -0.525241 | 2.875012  | -1.110007 |
| O                                                                                                  | -0.840677 | 4.714842  | -0.031644 |
| I                                                                                                  | -1.266755 | -0.010907 | -1.701878 |
| O                                                                                                  | -1.067692 | -1.776835 | -1.579892 |
| O                                                                                                  | -1.818787 | 0.400283  | -0.007713 |
| O                                                                                                  | -3.043312 | 0.027994  | -2.427219 |
| H                                                                                                  | -3.606993 | -0.585036 | -1.926834 |
| I                                                                                                  | 2.085499  | 1.117378  | 0.030709  |
| O                                                                                                  | 2.698661  | -0.160295 | 1.138428  |
| O                                                                                                  | 0.964385  | 0.151729  | -1.030222 |
| O                                                                                                  | 3.544156  | 1.003610  | -1.215747 |
| H                                                                                                  | 3.742753  | 0.070790  | -1.408879 |
| I                                                                                                  | -0.429792 | -0.196259 | 2.006050  |
| O                                                                                                  | 0.432435  | 1.374168  | 1.448310  |
| O                                                                                                  | 0.674607  | -0.503662 | 3.569729  |
| H                                                                                                  | 1.549317  | -0.763897 | 3.251997  |

| (HNO <sub>3</sub> ) <sub>3</sub> (HIO <sub>3</sub> ) <sub>3</sub> | X         | Y        | Z         |
|-------------------------------------------------------------------|-----------|----------|-----------|
| N                                                                 | -1.735728 | 3.881068 | -1.450434 |
| O                                                                 | -2.236201 | 2.858292 | -2.157862 |
| H                                                                 | -2.127326 | 2.040748 | -1.589572 |
| O                                                                 | -1.286472 | 3.631374 | -0.340237 |
| O                                                                 | -1.775659 | 4.945574 | -1.973755 |

|   |           |           |           |
|---|-----------|-----------|-----------|
| N | 3.122607  | 1.777699  | 2.179018  |
| O | 2.313059  | 0.696712  | 2.259975  |
| H | 2.555941  | 0.084400  | 1.510057  |
| O | 3.955332  | 1.784502  | 1.295231  |
| O | 2.930073  | 2.615808  | 2.998101  |
| N | -4.256091 | -0.901639 | 0.191089  |
| O | -3.833526 | -1.774559 | -0.728209 |
| H | -3.002946 | -2.186570 | -0.366961 |
| O | -3.687140 | -0.930976 | 1.272740  |
| O | -5.150977 | -0.190191 | -0.131296 |
| I | 2.177265  | -0.135266 | -1.316767 |
| O | 2.638029  | -0.974916 | 0.209815  |
| O | 1.053624  | 1.151594  | -0.745227 |
| O | 3.730040  | 0.974916  | -1.437609 |
| H | 3.940027  | 1.344303  | -0.561305 |
| I | -0.900287 | 1.064791  | 0.790594  |
| O | -0.392110 | -0.615762 | 1.268092  |
| O | -1.908290 | 0.738492  | -0.645522 |
| O | -2.276782 | 1.258583  | 2.082899  |
| H | -2.959559 | 0.568461  | 1.936372  |
| I | 0.083804  | -2.596724 | 0.197143  |
| O | 0.426049  | -1.649441 | -1.322599 |
| O | -1.626873 | -3.033518 | -0.008264 |
| O | 0.791504  | -4.261869 | -0.485590 |
| H | 0.247512  | -4.586666 | -1.213197 |

---

## Supplementary Reference

- Elm, J. and Kristensen, K.: Basis set convergence of the binding energies of strongly hydrogen-bonded atmospheric clusters, *Phys. Chem. Chem. Phys.*, 19, 1122–1133, <https://doi.org/10.1039/C6CP06851K>, 2017.
- Francl, M. M., Pietro, W. J., Hehre, W. J., Binkley, J. S., Gordon, M. S., DeFrees, D. J., and Pople, J. A.: Self-consistent molecular orbital methods. XXIII. A polarization-type basis set for second-row elements, *J. Chem. Phys.*, 77, 3654–3665, <https://doi.org/10.1063/1.444267>, 1982.
- Lu, T. and Chen, F.: Multiwfn: A multifunctional wavefunction analyzer, *J. Comput. Chem.*, 33, 580–592, <https://doi.org/10.1002/jcc.22885>, 2012.
- Peterson, K. A., Figgen, D., Goll, E., Stoll, H., and Dolg, M.: Systematically convergent basis sets with relativistic pseudopotentials. II. Small-core pseudopotentials and correlation consistent basis sets for the post-d group 16–18 elements, *J. Chem. Phys.*, 119, 11113–11123, <https://doi.org/10.1063/1.1622924>, 2003.
- Rappe, A. K., Casewit, C. J., Colwell, K. S., Goddard, W. A., and Skiff, W. M.: UFF, a full periodic table force field for molecular mechanics and molecular dynamics simulations, *J. Am. Chem. Soc.*, 114, 10024–10035, <https://doi.org/10.1021/ja00051a040>, 1992.
- Stewart, J. J. P.: Optimization of parameters for semiempirical methods VI: more modifications to the NDDO approximations and re-optimization of parameters, *J. Mol. Model.*, 19, 1–32, <https://doi.org/10.1007/s00894-012-1667-x>, 2013.
- Stewart, J. J. P.: MOPAC2016; Colorado Springs; CO (USA), <http://openmopac.net/MOPAC2016.html> (last access: 22 Feb 2024), 2016.
- Zhang, J. and Dolg, M.: ABCluster: the artificial bee colony algorithm for cluster global optimization, *Phys. Chem. Chem. Phys.*, 17, 24173–24181, <https://doi.org/10.1039/C5CP04060D>, 2015.
